# Supplementary material for: Structural and compositional data for childrenite from the Homolka granite, Czech Republic
Source: Copernicus journal article supplement (doi:10.5194/ejm-36-1-2024), 2024-01-04
Supplement: Supplementary file 1 [file ejm-36-1-2024-supplement.zip]

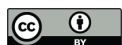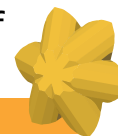

*Supplement of*

## **Structural and compositional data for childrenite from the Homolka granite, Czech Republic**

**Jonas Toupal et al.**

*Correspondence to:* Jonas Toupal ([toupal@sas.upenn.edu](mailto:toupal@sas.upenn.edu))

- [ejm-36-1-2024-supplement-title-page.pdf](#)
- [Childrenite\\_Homolka.cif](#)
- [Table S1.xlsx](#)

The copyright of individual parts of the supplement might differ from the article licence.
