# Supplementary material for: Structural and compositional data for childrenite from the Homolka granite, Czech Republic
Source: Copernicus journal article supplement (doi:10.5194/ejm-36-1-2024), 2024-01-04
Supplement: Supplementary file 1 [file Table S1.xlsx]

## Sheet: Sheet1
Table S1. Electron microprobe analyses of the two studied childrenite grains
wt.%	Homolka1	Homolka2	Homolka3	Homolka4	Homolka5	Homolka6	Homolka7	Homolka8	Homolka9	Homolka10	Homolka2an1	Homolka2an2	Homolka2an3	Homolka2an4	Homolka2an5	Homolka2an6	Homolka2an7	Homolka2an8	Homolka2an9	Homolka2an10
	Grain A										Grain B
SiO2	0.57	0.748	0.019	0.314	0.277	0	0.147	0.243	0.074	0.074	0	0.037	0.402	0.388	0	0.074	0.037	0.44	0.128	0.018
Al2O3	21.692	21.436	21.836	21.752	21.951	22.134	21.335	22.354	21.877	21.635	22.39	22.209	22.078	21.938	22.375	22.185	21.914	22.114	21.849	21.87
FeO	25.4405	18.1412	24.7815	21.4559	19.5731	20.42	21.7518	26.6444	24.4466	21.9478	20.7859	20.66	15.2665	23.3937	21.3129	25.9394	24.8785	19.5161	18.3302	20.678
MnO	5.596	12.304	6.815	9.213	11.071	9.6	9.283	5.014	6.405	9.84	9.544	9.348	14.57	7.373	8.897	4.062	5.477	11.053	12.727	10.138
CaO	0.771	0.916	0.583	1.055	0.878	1.178	1.618	0.354	1.195	0.311	0.863	0.745	0.611	0.582	0.856	1.213	1.015	0.289	0.316	0.464
P2O5	33.825	33.202	33.465	32.825	33.216	33.495	33.604	32.887	33.312	32.001	32.527	32.592	33.025	32.156	31.972	32.55	32.896	33.286	33.161	33.029
Anhydrous total	87.8945	86.7472	87.4995	86.6149	86.9661	86.827	87.7388	87.4964	87.3096	85.8088	86.1099	85.591	85.9525	85.8307	85.4129	86.0234	86.2175	86.6981	86.5112	86.197
H2O calc	15.7384	15.6003	15.8529	15.787	15.7492	15.6772	15.9783	15.9671	15.8882	15.8215	15.762	15.5507	15.4379	15.6997	15.7351	15.7247	15.6662	15.5332	15.6111	15.5836
Total	103.633	102.348	103.352	102.402	102.715	102.504	103.717	103.463	103.198	101.63	101.872	101.142	101.39	101.53	101.148	101.748	101.884	102.231	102.122	101.781
Atoms per Formula Unit (based on 3 cations and 7 oxygens)
Si	0.0209535	0.0278099	0.000701944	0.0116855	0.0102655	0	0.00540946	0.0089629	0.00273382	0.00278605	0	0.00139109	0.0150487	0.0145691	0	0.00276786	0.00138332	0.0163627	0.00477635	0.00067392
Al	0.93975	0.93923	0.950719	0.953996	0.958704	0.967191	0.925251	0.97169	0.95248	0.959941	0.985645	0.984037	0.974009	0.970798	0.992428	0.977918	0.965543	0.96917	0.960833	0.964972
Fe	0.782073	0.564032	0.765627	0.667733	0.606594	0.633165	0.66938	0.82184	0.755258	0.691016	0.6493	0.649563	0.477916	0.734581	0.670792	0.811358	0.777829	0.606924	0.571995	0.647415
Mn	0.174228	0.387438	0.213242	0.290386	0.347491	0.301474	0.289323	0.156633	0.200408	0.313769	0.301942	0.297665	0.461944	0.234479	0.2836	0.12868	0.173428	0.348129	0.402225	0.321473
Ca	0.0303654	0.0364868	0.023076	0.0420641	0.0348608	0.0467961	0.0637907	0.013989	0.0472985	0.0125447	0.0345374	0.030009	0.0245051	0.0234135	0.0345161	0.0486089	0.0406563	0.0115144	0.0126333	0.0186121
P	1.05263	1.045	1.04663	1.03413	1.04208	1.05137	1.04685	1.02688	1.04182	1.01994	1.02857	1.03733	1.04658	1.02216	1.01866	1.03067	1.04116	1.0479	1.04754	1.04685
Sum Cations	3	3	3	3	3	3	3	3	3	3	3	3	3	3	3	3	3	3	3	3
OH	2.13955	2.12986	2.09203	2.07977	2.10549	2.12131	2.07661	2.07027	2.08341	2.02534	2.07137	2.09882	2.14384	2.06642	2.04842	2.07546	2.09179	2.14559	2.11299	2.10688
H2O	0.860453	0.87014	0.907973	0.920228	0.894514	0.878687	0.92339	0.929729	0.916586	0.974657	0.928632	0.901178	0.856164	0.933584	0.951581	0.924543	0.908208	0.854406	0.887005	0.893118
H	3.86045	3.87014	3.90797	3.92023	3.89451	3.87869	3.92339	3.92973	3.91659	3.97466	3.92863	3.90118	3.85616	3.93358	3.95158	3.92454	3.90821	3.85441	3.88701	3.89312
