# Supplementary material for: Structural and compositional data for childrenite from the Homolka granite, Czech Republic
Source: Copernicus journal article supplement (doi:10.5194/ejm-36-1-2024), 2024-01-04
Supplement: Supplementary file 2 [file ejm-36-1-2024-supplement.zip]

Archive with 3 entries (3 files):
- Childrenite_Homolka.cif
- Table S1.xlsx
- ejm-36-1-2024-supplement-title-page.pdf
