# Supplementary material for: Structural and compositional data for childrenite from the Homolka granite, Czech Republic
Source: Copernicus journal article supplement (doi:10.5194/ejm-36-1-2024), 2024-01-04
Supplement: Supplementary file 2 [file ejm-36-1-2024-supplement.zip › Childrenite_Homolka.cif]

 
data_shelx
 
_audit_creation_method            'SHELXL-2018/1'
_shelx_SHELXL_version_number      '2018/1'
_chemical_name_mineral            'childrenite'
_chemical_compound_source         'Homolka granite, Czed Republic'
_chemical_formula_analytical
;      
Al0.96 Ca0.03 Fe0.68 H3.90 Mn0.28 O7 P1.04 
Si0.04
;
_chemical_formula_sum
 'Al Ca0.11 H4 Fe0.89 O7 P' 
_chemical_formula_weight          228.13

loop_
 _atom_type_symbol
 _atom_type_description
 _atom_type_scat_dispersion_real
 _atom_type_scat_dispersion_imag
 _atom_type_scat_source
 'O'  'O'   0.0106   0.0060
 'International Tables Vol C Tables 4.2.6.8 and 6.1.1.4'
 'Al'  'Al'   0.0645   0.0514
 'International Tables Vol C Tables 4.2.6.8 and 6.1.1.4'
 'P'  'P'   0.1023   0.0942
 'International Tables Vol C Tables 4.2.6.8 and 6.1.1.4'
 'Fe'  'Fe'   0.3463   0.8444
 'International Tables Vol C Tables 4.2.6.8 and 6.1.1.4'
 'H'  'H'   0.0000   0.0000
 'International Tables Vol C Tables 4.2.6.8 and 6.1.1.4'
 'Ca'  'Ca'   0.2262   0.3064
 'International Tables Vol C Tables 4.2.6.8 and 6.1.1.4'
 
_space_group_crystal_system       orthorhombic
_space_group_IT_number            64
_space_group_name_H-M_alt         'C m c a'
_space_group_name_Hall            '-C 2bc 2'
 
_shelx_space_group_comment
;
The symmetry employed for this shelxl refinement is uniquely defined
by the following loop, which should always be used as a source of
symmetry information in preference to the above space-group names.
They are only intended as comments.
;
 
loop_
 _space_group_symop_operation_xyz
 'x, y, z'
 'x, -y, -z'
 '-x+1/2, y, -z+1/2'
 '-x+1/2, -y, z+1/2'
 'x+1/2, y+1/2, z'
 'x+1/2, -y+1/2, -z'
 '-x+1, y+1/2, -z+1/2'
 '-x+1, -y+1/2, z+1/2'
 '-x, -y, -z'
 '-x, y, z'
 'x-1/2, -y, z-1/2'
 'x-1/2, y, -z-1/2'
 '-x+1/2, -y+1/2, -z'
 '-x+1/2, y+1/2, z'
 'x, -y+1/2, z-1/2'
 'x, y+1/2, -z-1/2'
 
_cell_length_a                    6.9226(9)
_cell_length_b                    10.4081(13)
_cell_length_c                    13.3957(17)
_cell_angle_alpha                 90
_cell_angle_beta                  90
_cell_angle_gamma                 90
_cell_volume                      965.2(2)
_cell_formula_units_Z             8
_cell_measurement_temperature     273(2)
_cell_measurement_reflns_used     3298
_cell_measurement_theta_min       3.041
_cell_measurement_theta_max       28.205
 
_exptl_crystal_description        'anhedral'
_exptl_crystal_colour             'colorless'
_exptl_crystal_density_meas       'not measured'
_exptl_crystal_density_method     ?
_exptl_crystal_density_diffrn     3.140          
_exptl_crystal_F_000              906.8
_exptl_transmission_factor_min    ?
_exptl_transmission_factor_max    ?
_exptl_crystal_size_max           0.090
_exptl_crystal_size_mid           0.060
_exptl_crystal_size_min           0.050
_exptl_absorpt_coefficient_mu     3.416
_shelx_estimated_absorpt_T_min    0.729
_shelx_estimated_absorpt_T_max    0.835
_exptl_absorpt_correction_type    multi-scan
_exptl_absorpt_correction_T_min   0.764
_exptl_absorpt_correction_T_max   0.829
_exptl_absorpt_process_details
;
 SADABS 2016/2: Krause, L., Herbst-Irmer, R., Sheldrick G.M. & Stalke D.,
 J. Appl. Cryst. 48 (2015) 3-10
;
_exptl_absorpt_special_details    ?
_diffrn_ambient_temperature       273(2)
_diffrn_radiation_wavelength      0.71073
_diffrn_radiation_type            MoK\a
_diffrn_source                    'micro-focus'
_diffrn_measurement_device_type   'Bruker D8 Venture'
_diffrn_reflns_number             5429
_diffrn_reflns_av_unetI/netI      0.0208
_diffrn_reflns_av_R_equivalents   0.0343
_diffrn_reflns_limit_h_min        -6
_diffrn_reflns_limit_h_max        9
_diffrn_reflns_limit_k_min        -13
_diffrn_reflns_limit_k_max        13
_diffrn_reflns_limit_l_min        -17
_diffrn_reflns_limit_l_max        17
_diffrn_reflns_theta_min          3.041
_diffrn_reflns_theta_max          28.284
_diffrn_reflns_theta_full         25.242
_diffrn_measured_fraction_theta_max   0.985
_diffrn_measured_fraction_theta_full  0.992
_diffrn_reflns_Laue_measured_fraction_max    0.985
_diffrn_reflns_Laue_measured_fraction_full   0.992
_diffrn_reflns_point_group_measured_fraction_max   0.985
_diffrn_reflns_point_group_measured_fraction_full  0.992
_reflns_number_total              640
_reflns_number_gt                 602
_reflns_threshold_expression      'I > 2\s(I)'
_reflns_Friedel_coverage          0.000
_reflns_Friedel_fraction_max      .
_reflns_Friedel_fraction_full     .
 
_reflns_special_details
;
 Reflections were merged by SHELXL according to the crystal
 class for the calculation of statistics and refinement.
 
 _reflns_Friedel_fraction is defined as the number of unique
 Friedel pairs measured divided by the number that would be
 possible theoretically, ignoring centric projections and
 systematic absences.
;
 
_computing_data_collection      'Apex4 (Bruker AXS Inc., 2022)'
_computing_cell_refinement      'Apex4 (Bruker AXS Inc., 2022)'
_computing_data_reduction       'Apex4 (Bruker AXS Inc., 2022)'
_computing_structure_refinement 'SHELXL-2018/1 (Sheldrick, 2018)'
_computing_molecular_graphics     ?
_computing_publication_material   ?
_refine_special_details           ?
_refine_ls_structure_factor_coef  Fsqd
_refine_ls_matrix_type            full
_refine_ls_weighting_scheme       calc
_refine_ls_weighting_details
'w=1/[\s^2^(Fo^2^)+(0.0277P)^2^+5.2739P] where P=(Fo^2^+2Fc^2^)/3'
_atom_sites_solution_primary      ?
_atom_sites_solution_secondary    ?
_atom_sites_solution_hydrogens    difmap
_refine_ls_hydrogen_treatment     refall
_refine_ls_extinction_method      none
_refine_ls_extinction_coef        .
_refine_ls_number_reflns          640
_refine_ls_number_parameters      66
_refine_ls_number_restraints      3
_refine_ls_R_factor_all           0.0310
_refine_ls_R_factor_gt            0.0295
_refine_ls_wR_factor_ref          0.0717
_refine_ls_wR_factor_gt           0.0710
_refine_ls_goodness_of_fit_ref    1.174
_refine_ls_restrained_S_all       1.174
_refine_ls_shift/su_max           0.000
_refine_ls_shift/su_mean          0.000
 
loop_
 _atom_site_label
 _atom_site_type_symbol
 _atom_site_fract_x
 _atom_site_fract_y
 _atom_site_fract_z
 _atom_site_U_iso_or_equiv
 _atom_site_adp_type
 _atom_site_occupancy
 _atom_site_site_symmetry_order  
 _atom_site_calc_flag
 _atom_site_refinement_flags_posn
 _atom_site_refinement_flags_adp
 _atom_site_refinement_flags_occupancy
 _atom_site_disorder_assembly
 _atom_site_disorder_group
Fe Fe 0.250000 0.13273(5) 0.250000 0.01059(19) Uani 0.892(14) 2 d S T P . .
Ca Ca 0.250000 0.13273(5) 0.250000 0.01059(19) Uani 0.108(14) 2 d S T P . .
Al Al 0.250000 0.250000 0.000000 0.0090(3) Uani 1 2 d S . P . .
P1 P 0.000000 0.37743(8) 0.33232(6) 0.0071(2) Uani 1 2 d S T P . .
O1 O 0.000000 0.2642(2) 0.25768(19) 0.0124(6) Uani 1 2 d S T P . .
O2 O 0.000000 0.0070(2) 0.22147(19) 0.0104(5) Uani 1 2 d S T P . .
O3 O 0.000000 0.2535(2) 0.04867(18) 0.0097(5) Uani 1 2 d DS T P . .
O4 O 0.1825(3) 0.11098(17) 0.40678(13) 0.0114(4) Uani 1 1 d D . . . .
O5 O 0.3195(3) 0.13162(16) 0.60107(13) 0.0104(4) Uani 1 1 d . . . . .
H1 H 0.231(6) 0.031(3) 0.419(3) 0.030(10) Uiso 1 1 d D . . . .
H2 H 0.048(5) 0.105(7) 0.411(6) 0.04(3) Uiso 0.5 1 d D . P . .
H3 H 0.000000 0.286(6) 0.112(3) 0.05(2) Uiso 1 2 d DS . P . .
 
loop_
 _atom_site_aniso_label
 _atom_site_aniso_U_11
 _atom_site_aniso_U_22
 _atom_site_aniso_U_33
 _atom_site_aniso_U_23
 _atom_site_aniso_U_13
 _atom_site_aniso_U_12
Fe 0.0101(4) 0.0109(3) 0.0108(3) 0.000 0.0010(2) 0.000
Ca 0.0101(4) 0.0109(3) 0.0108(3) 0.000 0.0010(2) 0.000
Al 0.0073(6) 0.0099(5) 0.0097(5) -0.0028(4) -0.0007(4) -0.0008(4)
P1 0.0090(5) 0.0057(4) 0.0067(4) 0.0003(3) 0.000 0.000
O1 0.0182(15) 0.0094(12) 0.0095(11) -0.0024(9) 0.000 0.000
O2 0.0129(15) 0.0067(11) 0.0118(12) -0.0027(9) 0.000 0.000
O3 0.0096(13) 0.0119(12) 0.0077(11) -0.0010(9) 0.000 0.000
O4 0.0125(11) 0.0094(8) 0.0123(8) -0.0016(6) -0.0020(7) 0.0023(7)
O5 0.0100(11) 0.0098(8) 0.0112(8) 0.0024(6) -0.0017(7) -0.0002(7)
 
_geom_special_details
;
 All esds (except the esd in the dihedral angle between two l.s. planes)
 are estimated using the full covariance matrix.  The cell esds are taken
 into account individually in the estimation of esds in distances, angles
 and torsion angles; correlations between esds in cell parameters are only
 used when they are defined by crystal symmetry.  An approximate (isotropic)
 treatment of cell esds is used for estimating esds involving l.s. planes.
;
 
loop_
 _geom_bond_atom_site_label_1
 _geom_bond_atom_site_label_2
 _geom_bond_distance
 _geom_bond_site_symmetry_2
 _geom_bond_publ_flag
Fe O4 2.1634(19) . ?
Fe O4 2.1635(19) 3 ?
Fe O2 2.2032(16) . ?
Fe O2 2.2032(16) 3 ?
Fe O1 2.2086(16) 3 ?
Fe O1 2.2086(16) . ?
Al O3 1.8497(9) 13 ?
Al O3 1.8497(9) . ?
Al O5 1.8927(17) 15 ?
Al O5 1.8927(17) 3 ?
Al O4 1.9676(18) 15 ?
Al O4 1.9676(18) 3 ?
P1 O2 1.529(3) 7_455 ?
P1 O5 1.539(2) 13_556 ?
P1 O5 1.539(2) 6_456 ?
P1 O1 1.545(3) . ?
O3 H3 0.91(3) . ?
O4 H1 0.91(3) . ?
O4 H2 0.94(3) . ?
 
loop_
 _geom_angle_atom_site_label_1
 _geom_angle_atom_site_label_2
 _geom_angle_atom_site_label_3
 _geom_angle
 _geom_angle_site_symmetry_1
 _geom_angle_site_symmetry_3
 _geom_angle_publ_flag
O4 Fe O4 167.98(10) . 3 ?
O4 Fe O2 86.36(8) . . ?
O4 Fe O2 86.51(8) 3 . ?
O4 Fe O2 86.51(8) . 3 ?
O4 Fe O2 86.36(8) 3 3 ?
O2 Fe O2 107.11(11) . 3 ?
O4 Fe O1 106.22(8) . 3 ?
O4 Fe O1 81.39(8) 3 3 ?
O2 Fe O1 167.28(9) . 3 ?
O2 Fe O1 76.15(8) 3 3 ?
O4 Fe O1 81.39(8) . . ?
O4 Fe O1 106.22(8) 3 . ?
O2 Fe O1 76.15(8) . . ?
O2 Fe O1 167.28(9) 3 . ?
O1 Fe O1 103.44(11) 3 . ?
O3 Al O3 180.0 13 . ?
O3 Al O5 91.56(10) 13 15 ?
O3 Al O5 88.44(10) . 15 ?
O3 Al O5 88.44(10) 13 3 ?
O3 Al O5 91.56(10) . 3 ?
O5 Al O5 180.00(11) 15 3 ?
O3 Al O4 90.74(10) 13 15 ?
O3 Al O4 89.26(10) . 15 ?
O5 Al O4 92.04(8) 15 15 ?
O5 Al O4 87.96(8) 3 15 ?
O3 Al O4 89.26(10) 13 3 ?
O3 Al O4 90.74(10) . 3 ?
O5 Al O4 87.96(8) 15 3 ?
O5 Al O4 92.04(8) 3 3 ?
O4 Al O4 180.00(11) 15 3 ?
O3 Al Ca 71.07(7) 13 13 ?
O3 Al Ca 108.93(7) . 13 ?
O5 Al Ca 116.69(5) 15 13 ?
O5 Al Ca 63.31(5) 3 13 ?
O4 Al Ca 32.00(6) 15 13 ?
O4 Al Ca 148.00(6) 3 13 ?
O2 P1 O5 109.10(9) 7_455 13_556 ?
O2 P1 O5 109.10(9) 7_455 6_456 ?
O5 P1 O5 108.66(15) 13_556 6_456 ?
O2 P1 O1 111.57(15) 7_455 . ?
O5 P1 O1 109.18(9) 13_556 . ?
O5 P1 O1 109.18(9) 6_456 . ?
O2 P1 Ca 31.477(18) 7_455 14 ?
O5 P1 Ca 79.64(7) 13_556 14 ?
O5 P1 Ca 131.12(7) 6_456 14 ?
O1 P1 Ca 113.02(9) . 14 ?
O2 P1 Ca 31.477(18) 7_455 5_455 ?
O5 P1 Ca 131.12(7) 13_556 5_455 ?
O5 P1 Ca 79.64(7) 6_456 5_455 ?
O1 P1 Ca 113.02(9) . 5_455 ?
Ca P1 Ca 62.057(19) 14 5_455 ?
P1 O1 Fe 120.17(8) . 10 ?
P1 O1 Fe 120.17(8) . . ?
Fe O1 Fe 103.18(11) 10 . ?
P1 O2 Fe 127.28(6) 7_445 . ?
P1 O2 Fe 127.28(6) 7_445 10 ?
Fe O2 Fe 103.54(10) . 10 ?
Al O3 Al 138.66(14) 6_455 . ?
Al O3 H3 109.6(5) 6_455 . ?
Al O3 H3 109.6(5) . . ?
Al O4 Fe 119.20(9) 3 . ?
Al O4 H1 118(3) 3 . ?
Fe O4 H1 101(2) . . ?
Al O4 H2 104(5) 3 . ?
Fe O4 H2 106(5) . . ?
H1 O4 H2 107(5) . . ?
P1 O5 Al 131.38(12) 13_556 3 ?
 
loop_
 _geom_hbond_atom_site_label_D 
 _geom_hbond_atom_site_label_H 
 _geom_hbond_atom_site_label_A 
 _geom_hbond_distance_DH 
 _geom_hbond_distance_HA 
 _geom_hbond_distance_DA 
 _geom_hbond_angle_DHA 
 _geom_hbond_site_symmetry_A 
 _geom_hbond_publ_flag
O3 H3 O1  0.91(3) 1.96(4) 2.802(3) 152(6) . yes
 
_refine_diff_density_max    0.498
_refine_diff_density_min   -0.923
_refine_diff_density_rms    0.122

_shelx_res_file
;
TITL mo_homolka_0m_a.res in Cmca
    shelx.res
    created by SHELXL-2018/1 at 16:06:41 on 02-Aug-2023
CELL 0.71073 6.9226 10.4081 13.3957 90.000 90.000 90.000
ZERR 8.00 0.0009 0.0013 0.0017 0.000 0.000 0.000
LATT 7
SYMM x, -y, -z
SYMM -x+1/2, y, -z+1/2
SYMM -x+1/2, -y, z+1/2
SFAC O AL P FE H CA
UNIT 56 8 8 8 2 1
LIST 4
TEMP 0.000
SIZE 0.050 0.060 0.090
ACTA
L.S. 10
FMAP 2
PLAN
HTAB
HTAB O3 O1
EXYZ FE CA
EADP FE CA
DFIX 0.95 0.03 H1 O4
DFIX 0.95 0.03 H2 O4
DFIX 0.95 0.03 H3 O3
BOND $H
rem  WGHT    0.028600    5.201100
WGHT    0.027700    5.273900
FVAR       0.29248   0.89227
FE    4    0.250000    0.132734    0.250000    20.50000    0.01015    0.01087 =
         0.01075    0.00000    0.00100    0.00000
CA    6    0.250000    0.132734    0.250000   -20.50000    0.01015    0.01087 =
         0.01075    0.00000    0.00100    0.00000
AL    2    0.250000    0.250000    0.000000    10.50000    0.00726    0.00991 =
         0.00968   -0.00277   -0.00072   -0.00078
P1    3    0.000000    0.377425    0.332317    10.50000    0.00900    0.00573 =
         0.00668    0.00035    0.00000    0.00000
O1    1    0.000000    0.264200    0.257678    10.50000    0.01818    0.00942 =
         0.00949   -0.00238    0.00000    0.00000
O2    1    0.000000    0.006989    0.221470    10.50000    0.01288    0.00668 =
         0.01176   -0.00268    0.00000    0.00000
O3    1    0.000000    0.253475    0.048668    10.50000    0.00959    0.01187 =
         0.00767   -0.00103    0.00000    0.00000
O4    1    0.182480    0.110979    0.406780    11.00000    0.01245    0.00939 =
         0.01232   -0.00163   -0.00197    0.00230
O5    1    0.319454    0.131619    0.601075    11.00000    0.01005    0.00984 =
         0.01118    0.00241   -0.00172   -0.00020
H1    5    0.230784    0.031054    0.418550    11.00000    0.02985
H2    5    0.047630    0.104746    0.410987    10.50000    0.04217
H3    5    0.000000    0.285772    0.112171    10.50000    0.05021
HKLF 4 1 1 0 0 0 1 0 0 0 1


REM  mo_homolka_0m_a.res in Cmca
REM R1 =  0.0295 for     602 Fo > 4sig(Fo)  and  0.0310 for all     640 data
REM     66 parameters refined using      3 restraints

END

WGHT      0.0274      5.3101

REM Instructions for potential hydrogen bonds
HTAB O3 O1

REM Highest difference peak  0.498,  deepest hole -0.923,  1-sigma level  0.122
Q1    1   0.0000  0.3038  0.3022  10.50000  0.05    0.50
Q2    1   0.2500  0.2136  0.2500  10.50000  0.05    0.47
Q3    1   0.0000  0.1281  0.1575  10.50000  0.05    0.47
Q4    1   0.2500  0.0602  0.2500  10.50000  0.05    0.45
Q5    1   0.4096  0.1350  0.6213  11.00000  0.05    0.40
Q6    1   0.0000  0.4117  0.1413  10.50000  0.05    0.40
Q7    1  -0.2500 -0.0741  0.2500  10.50000  0.05    0.40
Q8    1   0.2466  0.1686  0.4212  11.00000  0.05    0.36
Q9    1   0.1141  0.2438  0.0109  11.00000  0.05    0.35
Q10   1   0.1778  0.0811  0.2607  11.00000  0.05    0.33
Q11   1   0.0000 -0.0468  0.4086  10.50000  0.05    0.33
Q12   1   0.2387  0.1109  0.6298  11.00000  0.05    0.32
Q13   1   0.0000  0.3871  0.2068  10.50000  0.05    0.32
Q14   1   0.0000  0.2240  0.2914  10.50000  0.05    0.32
Q15   1   0.0931  0.2565  0.2420  11.00000  0.05    0.31
Q16   1   0.0000 -0.0449  0.1837  10.50000  0.05    0.30
Q17   1   0.3492  0.2304  0.6288  11.00000  0.05    0.30
Q18   1   0.3484  0.1404  0.5326  11.00000  0.05    0.29
Q19   1   0.0000 -0.0845  0.3112  10.50000  0.05    0.29
Q20   1   0.0000  0.3147  0.1853  10.50000  0.05    0.29
;
_shelx_res_checksum   43222

_shelx_hkl_file
;
  -2   0   0 1586.34  146.09
   2   0   0 1831.72   78.59
   2   0   0 1954.40  155.18
  -2   0   0 1866.81   78.29
   4   0   0 9472.75  493.35
  -4   0   0 9433.06  466.65
   4   0   0 9541.75  343.37
  -4   0   0 9999.00  345.67
   8   0   0 1254.87   45.20
  -1   1   0   -0.60    1.20
   1  -1   0   -0.20    0.70
   1  -1   0    1.30    1.30
  -1   1   0    0.70    0.70
   3  -1   0  -55.39  133.09
   3  -1   0    3.40   15.80
  -3   1   0   30.70   16.90
  -3   1   0   95.89  139.39
   7   1   0    1.60    2.00
   9  -1   0    0.00    2.70
   9   1   0    1.30    2.10
   0   2   0 2122.19  238.58
   0   2   0 2083.69  109.29
   0  -2   0 2461.15  246.08
   0  -2   0 1981.40  108.79
  -2   2   0   74.09    4.90
   2  -2   0   82.29    4.00
   2  -2   0   75.89    4.80
  -2   2   0   85.79    4.00
   4   2   0  793.22   27.50
   6   2   0  115.39    6.30
   8   2   0  201.58   10.10
  -1   3   0    0.30    2.20
  -1  -3   0    0.90    1.10
  -1  -3   0    0.20    1.20
   1   3   0    0.60    1.00
   1   3   0    2.20    1.60
   1   3   0    0.40    0.90
   1  -3   0    1.40    1.30
  -1   3   0    3.00    1.40
   1  -3   0    2.00    2.00
  -1  -3   0    1.40    0.90
   3  -3   0   -4.90   29.70
   3  -3   0   92.39  224.98
  -3   3   0  -70.89  204.48
  -3  -3   0   -8.90   15.00
   3   3   0   47.70  119.09
   3   3   0   23.10   15.20
  -3  -3   0  -77.99  127.69
  -3   3   0   48.80   30.30
   0  -4   0 3362.96  111.39
   0   4   0 3447.95  112.49
   0  -4   0 3307.07  111.89
  -2   4   0 3531.65  116.59
   2  -4   0 3618.54  117.69
  -2   4   0 3420.36  117.99
  -2  -4   0 3514.65  115.79
   4  -4   0   51.59    3.90
   4  -4   0   42.50    4.80
  -4   4   0   43.30    3.70
   6  -4   0   38.40    5.40
   6  -4   0   33.40    3.70
  -1   5   0    2.80    3.00
  -1  -5   0   -0.50    1.20
  -1  -5   0    1.10    1.20
  -1   5   0    0.80    1.50
   1   5   0    0.10    2.20
   1  -5   0   -1.10    1.70
   1  -5   0    0.40    1.50
   1  -5   0   -0.90    1.20
   1   5   0   -1.30    1.20
  -1  -5   0   -2.00    1.30
   1   5   0    0.20    1.30
   3  -5   0   -0.10    1.60
   3  -5   0    1.70    2.30
  -3   5   0    3.40    3.00
  -3   5   0   -0.50    2.60
   5  -5   0   -0.80    2.30
   5  -5   0   -0.60    1.90
   7  -5   0    3.00    3.10
   0  -6   0  480.45   19.00
   0  -6   0  490.85   18.50
   0  -6   0  508.05   18.50
   0   6   0  487.25   20.30
   0   6   0  481.05   18.40
   2   6   0    0.70    1.50
   2  -6   0   -1.00    2.30
   2  -6   0    2.60    2.30
  -2  -6   0    2.20    1.40
  -2  -6   0    3.10    1.60
   2   6   0    4.90    1.80
   2  -6   0    3.60    2.10
  -2   6   0    0.30    3.20
   2   6   0    2.70    2.50
  -4   6   0  153.68   10.30
   4  -6   0  144.09    9.00
  -4   6   0  143.39    7.90
   4  -6   0  147.69    8.00
   1   7   0    1.60    1.80
  -1  -7   0    0.00    1.70
  -1  -7   0    1.60    1.60
   1   7   0   -0.40    2.90
   1  -7   0   -2.80    1.70
   1  -7   0    0.60    1.80
  -1   7   0   -0.30    2.90
  -1  -7   0    0.70    1.60
   1  -7   0    0.30    2.10
   3   7   0    1.10    2.80
  -3   7   0   -0.80    3.60
   3   7   0    1.30    1.60
   3  -7   0    2.00    2.20
   3  -7   0    0.20    2.60
   3  -7   0    1.60    2.00
  -3   7   0   -1.10    1.50
  -3  -7   0    1.70    1.60
   5  -7   0   -0.30    2.20
   5  -7   0   -0.80    2.70
   7  -7   0    0.10    2.30
   0  -8   0 9455.55  316.77
   0   8   0 9447.85  319.07
   0  -8   0 9932.51  317.77
   2  -8   0  389.06   17.70
  -2  -8   0  412.76   15.70
  -2   8   0  405.76   19.70
   2  -8   0  385.06   17.00
  -2   8   0  374.76   16.60
  -2  -8   0  420.76   16.10
   2  -8   0  407.36   16.90
   2   8   0  392.46   18.40
   2   8   0  387.06   16.10
   4  -8   0 3163.28  106.19
   4  -8   0 3069.49  107.59
  -4   8   0 3117.79  109.49
   6  -8   0   31.80    5.20
   1  -9   0   -0.90    2.30
  -1   9   0    4.10    4.30
   1   9   0   -4.70    3.20
   1   9   0    2.40    2.40
   1  -9   0    0.60    2.50
   1  -9   0   -1.30    1.90
  -1  -9   0    1.90    2.20
  -1  -9   0   -2.10    1.90
  -1  -9   0    0.90    2.40
  -1   9   0    0.00    2.20
   3   9   0    6.30    4.20
   3  -9   0    3.60    2.90
   3  -9   0   -1.30    2.50
   3   9   0    3.00    2.30
  -3   9   0    3.30    2.60
  -3  -9   0    3.70    2.30
  -3   9   0   -0.30    4.10
   5  -9   0    0.30    2.40
  -5   9   0   -5.00    4.40
   7  -9   0   -1.70    2.80
   0 -10   0  378.96   17.00
   0  10   0  370.96   19.90
   0 -10   0  369.66   16.10
   0 -10   0  376.66   16.60
   0  10   0  355.76   16.50
   2  10   0  336.37   15.30
  -2 -10   0  341.97   15.00
   2 -10   0  350.36   16.10
  -2  10   0  328.77   19.40
  -2  10   0  306.27   18.00
   2  10   0  333.97   18.30
  -4  10   0  376.86   21.50
   4  10   0  375.96   19.10
   4 -10   0  375.36   17.70
   6 -10   0  264.17   14.70
  -6  10   0  305.77   18.70
  -1 -11   0    3.10    2.80
  -1  11   0    8.70    5.10
   1  11   0    1.40    3.10
   1 -11   0    6.80    3.30
  -1 -11   0    5.70    2.70
  -1 -11   0    4.40    3.20
  -3 -11   0    1.50    2.90
   3 -11   0    0.40    3.10
   3  11   0    1.60    2.90
  -3  11   0    3.20    5.90
   3  11   0    0.10    5.40
  -5  11   0   -4.00    6.00
   5 -11   0    3.60    3.60
   0 -12   0  358.06   18.00
   0  12   0  400.76   18.70
   0  12   0  395.46   22.70
   0 -12   0  414.96   18.60
   2 -12   0   74.09    7.60
   2  12   0   90.19    7.60
  -2  12   0   56.09   10.80
   2  12   0   89.39   12.10
  -2 -12   0   82.49    7.10
   4  12   0   57.09    9.40
   4 -12   0   70.09    7.90
  -4  12   0   72.69   12.80
   1  13   0    0.50    5.90
   1 -13   0   -0.90    3.20
  -1 -13   0   -2.30    3.10
  -1  13   0   -9.10    5.60
  -1 -13   0    0.50    3.10
   1  13   0    2.10    4.20
   3 -13   0    7.80    3.60
  -3 -13   0    0.00    3.20
   3  13   0    3.60    6.90
  -3  13   0    8.40    7.90
  -2   0  -1   53.99   88.79
   2   0   1  -29.40   86.19
   2   0  -1  124.79   75.39
   4   0  -1 -181.68  114.59
  -4   0   1   18.40   14.10
   4   0  -1 -170.18  112.19
  -4   0  -1   -1.00   18.40
   4   0   1   -5.30   15.60
  -4   0  -1 -133.49  127.69
   4   0   1  -19.00  142.69
  -4   0   1  -14.10   13.50
   8   0  -1    0.50    2.00
  -1   1   1  113.69    4.40
  -1   1   1  115.39    5.40
   1  -1   1  112.99    4.80
   1   1  -1  113.29    4.50
  -1  -1   1  119.39    4.50
   1  -1  -1  107.49    5.30
   1  -1  -1  111.99    4.40
  -1   1  -1  116.99    4.80
   3   1  -1  115.19    5.30
   5   1  -1   35.30    4.00
   7   1  -1   41.00    5.10
   7   1   1   39.60    4.80
   9   1  -1   17.80    4.10
   9  -1  -1   15.80    4.30
   0  -2   1  619.34   21.90
   0   2  -1  659.23   22.00
   0  -2   1  615.74   22.00
   0   2   1  671.73   22.80
   0   2   1  653.93   21.90
   0   2  -1  650.33   22.20
   0  -2   1  639.54   21.90
   0   2  -1  638.54   22.00
   0  -2  -1  646.84   22.60
   0  -2  -1  645.74   21.90
  -2  -2  -1 4237.68  317.97
   2   2  -1 4956.40  189.18
  -2   2   1 5132.09  228.08
   2  -2   1 5039.40  226.28
   2   2  -1 4537.15  300.97
  -2   2   1 5511.65  455.35
   2  -2   1 4320.87  438.96
   2   2   1 4892.91  194.48
  -2  -2   1 4981.00  189.48
  -2  -2   1 5319.87  338.27
  -2   2  -1 5165.88  451.85
   2  -2  -1 4597.04  428.46
  -2   2  -1 4442.46  244.58
   2  -2  -1 4798.52  223.98
   4   2  -1  341.97   13.00
   4  -2   1  338.37   13.40
   6   2  -1 1514.95   52.29
   8   2  -1   69.79    5.70
  -1  -3  -1   59.59    3.70
   1  -3   1   59.09    3.60
  -1   3   1   55.89    3.50
   1   3  -1   60.79    3.30
   1  -3   1   57.79    3.70
   1   3  -1   61.19    3.40
   1   3  -1   56.39    3.60
  -1   3   1   61.79    5.20
   1  -3   1   50.99    3.90
  -1  -3  -1   59.19    3.20
   1  -3  -1   63.19    3.60
   1   3   1   61.09    4.40
  -1   3  -1   65.89    4.60
   1  -3  -1   59.69    4.70
  -1  -3   1   62.69    3.30
  -1   3  -1   62.59    3.60
   1   3   1   57.59    3.20
  -1  -3   1   59.79    3.20
  -3   3   1    2.10    1.40
   3  -3   1    2.40    2.00
  -3   3   1    3.50    2.70
   3   3  -1    1.80    1.30
   3  -3   1    0.50    1.50
   3  -3  -1    2.90    1.50
   3  -3  -1    5.10    2.50
  -3   3  -1    2.20    2.30
   5  -3   1   47.90    3.70
   5  -3   1   45.10    4.40
   5   3  -1   38.50    3.50
   5  -3  -1   45.20    5.40
   7   3  -1   13.00    3.10
   0   4  -1   44.20    3.40
   0   4  -1   49.10    3.30
   0   4  -1   44.70    4.10
   0  -4  -1   38.20    3.10
   0  -4  -1   43.50    3.10
   0  -4   1   43.30    3.70
   0   4   1   45.90    4.70
   0  -4  -1   45.40    4.20
   0  -4   1   48.40    3.40
   0  -4   1   53.49    3.40
   0   4   1   39.60    3.10
  -2  -4  -1   78.79    3.90
  -2   4   1   70.49    6.20
  -2   4   1   82.29    4.50
   2  -4   1   63.89    5.00
   2   4  -1   75.29    4.10
   2   4  -1   69.39    3.90
   2  -4   1   77.39    4.60
   2   4   1   73.69    3.90
   2  -4  -1   77.89    4.50
   2  -4  -1   79.19    5.70
  -2  -4   1   70.39    3.80
  -2  -4   1   69.99    4.00
  -2   4  -1   80.99    4.60
  -2   4  -1   69.89    5.90
   4  -4   1   15.20    3.20
   4  -4   1   22.60    3.20
  -4   4   1   17.60    2.90
   4  -4  -1   13.60    2.60
   4  -4  -1   14.00    3.60
   6  -4  -1   79.19    6.80
  -1   5   1   22.90    3.00
   1  -5   1   17.50    2.80
   1   5  -1   16.30    3.30
  -1  -5  -1   14.40    2.40
   1   5  -1   22.60    2.90
   1  -5   1   15.10    3.00
   1   5  -1   22.10    2.90
  -1   5   1   20.10    5.50
  -1  -5  -1   15.40    2.70
   1  -5   1   14.40    2.70
  -1   5  -1   16.00    2.70
   1  -5  -1   22.20    3.00
  -1  -5   1   16.30    2.50
  -1  -5   1   22.40    2.60
   1  -5  -1   24.70    4.10
   1   5   1   13.30    3.60
   1   5   1   13.10    2.40
  -1   5  -1   21.00    5.10
  -1  -5   1   21.30    2.80
   3  -5   1  120.29    6.60
  -3   5   1  123.09    7.20
  -3   5   1  130.09    8.70
   3  -5   1  130.29    7.70
  -3   5  -1  129.89    8.50
  -3   5  -1  114.59    7.10
   3  -5  -1  114.09    7.70
   3  -5  -1  122.79    6.60
  -3  -5   1  132.19    6.10
   5  -5   1    5.70    2.50
   5  -5   1    8.80    3.20
  -5   5   1    6.70    2.70
   5  -5  -1   10.20    2.70
   5  -5  -1    4.70    3.40
   7  -5   1   26.40    4.70
   7  -5   1   18.80    5.70
   7  -5  -1   26.00    4.80
   0   6  -1  368.76   14.50
   0  -6  -1  380.76   15.20
   0  -6   1  346.47   14.60
   0   6   1  367.96   14.40
   0   6   1  391.16   16.60
   0  -6   1  366.56   14.40
   0  -6   1  355.36   14.40
   0  -6  -1  346.57   14.30
   0  -6  -1  366.86   14.20
   0   6  -1  351.16   15.70
   2   6  -1 1919.71   65.69
  -2   6   1 1845.52   68.59
   2  -6   1 1852.71   66.29
  -2  -6  -1 1931.91   65.49
   2   6  -1 2003.70   66.79
   2   6  -1 1924.31   65.79
   2  -6   1 1979.60   68.29
   2  -6  -1 2023.00   68.99
  -2  -6   1 1954.50   65.49
  -2   6  -1 1921.71   68.29
   2   6   1 1949.20   65.59
   2   6   1 1997.70   67.79
   2  -6  -1 1933.11   66.29
  -2  -6   1 2005.70   65.59
   4  -6   1  216.78   11.40
   4  -6   1  226.68   10.50
  -4   6   1  218.48   12.60
  -4   6   1  202.58   10.10
  -4   6  -1  218.28   12.50
   4  -6  -1  209.58   11.70
   4  -6  -1  220.48   10.40
   6  -6   1  907.61   33.60
   6  -6   1  870.51   34.60
   6  -6  -1  903.71   35.00
   6  -6  -1  919.41   33.40
   1  -7   1  130.39    7.90
   1   7  -1  136.09    7.50
   1  -7   1  142.39    7.90
  -1   7   1  144.09   10.10
  -1  -7  -1  149.59    7.00
   1   7  -1  135.69    7.30
   1  -7   1  133.89    7.50
  -1  -7  -1  138.89    7.60
   1   7  -1  141.99    8.80
  -1  -7  -1  142.59    7.20
   1   7   1  134.79    7.20
  -1  -7   1  134.69    7.30
   1   7   1  135.39    9.20
   1  -7  -1  130.29    7.60
  -1   7  -1  140.69    9.70
   1  -7  -1  142.59    7.60
  -1  -7   1  135.19    7.10
  -1  -7   1  149.09    7.40
   1  -7  -1  131.99    8.40
   3  -7   1   -0.30    1.90
  -3   7   1   -5.00    3.00
   3  -7   1    0.40    1.90
  -3  -7  -1   -1.30    1.50
   3   7  -1   -2.90    2.40
  -3   7   1   -0.30    1.70
   3  -7   1    0.50    2.30
   3   7  -1   -0.10    1.60
  -3   7  -1   -0.30    3.20
   3   7   1   -0.20    1.60
   3   7   1   -0.90    3.00
   3  -7  -1   -1.10    2.50
  -3   7  -1   -2.00    1.60
   3  -7  -1    0.80    2.10
   5  -7   1  113.69   10.30
   5  -7   1  109.79    8.10
   5  -7   1  104.69    7.20
  -5   7   1  108.59   10.00
   5  -7  -1   98.39    7.10
  -5   7  -1   96.39    9.60
   5  -7  -1  104.99    8.10
   7  -7   1   23.80    4.50
   7  -7  -1   24.50    4.50
   0  -8   1  164.88    8.70
   0   8   1  150.88    9.80
   0  -8   1  151.58    8.30
   0  -8  -1  155.48    8.40
   0  -8  -1  153.78    8.20
   0   8   1  155.98   10.90
   0   8  -1  173.78   11.00
   0  -8   1  148.09    8.70
   0  -8  -1  164.78    9.20
  -2   8   1    4.10    2.50
  -2   8   1    3.80    4.10
   2   8  -1    2.00    2.20
   2  -8   1    1.90    2.20
  -2  -8  -1    5.40    2.40
   2  -8   1    2.80    2.50
   2   8  -1    3.40    3.40
   2  -8   1    2.80    2.60
   2   8  -1    8.30    2.70
  -2  -8   1    4.20    2.40
   2  -8  -1    7.10    2.80
   2  -8  -1    3.50    2.30
  -2   8  -1   -2.40    3.10
   2  -8  -1   -0.10    2.50
  -2   8  -1    5.20    2.60
   2   8   1    4.30    2.30
   2   8   1    9.70    4.50
  -2  -8   1    1.70    1.80
   4  -8   1  246.58   13.50
   4  -8   1  259.47   12.70
   4   8  -1  242.88   12.90
  -4   8   1  281.87   16.20
  -4   8  -1  242.88   15.20
   4  -8  -1  253.37   12.60
   4  -8  -1  265.97   13.90
   4   8   1  247.78   13.60
   6  -8   1   34.40    5.40
   6  -8  -1   28.80    4.80
  -1   9   1   14.00    5.60
  -1  -9  -1   13.70    3.40
  -1  -9  -1   15.80    3.50
   1  -9   1   16.00    3.70
   1  -9   1   15.00    3.40
   1   9  -1   15.40    4.10
   1   9  -1   15.80    5.20
  -1   9   1   17.40    3.70
   1  -9   1   10.40    3.70
   1   9   1   15.30    5.70
   1  -9  -1   19.80    4.60
  -1   9  -1   11.70    5.20
  -1  -9   1   16.10    3.30
   1  -9  -1   15.60    3.70
  -1  -9   1   17.20    3.60
   1   9   1   17.20    3.70
   1  -9  -1   14.20    3.40
  -1   9  -1   13.60    3.70
  -3   9   1  108.79   12.60
  -3   9   1   96.09    8.30
   3   9  -1   86.29    6.20
   3  -9   1   98.19    7.30
  -3  -9  -1   89.09    6.10
   3   9  -1   88.39    8.60
   3   9  -1   85.39    6.50
  -3   9  -1   92.99   10.00
   3  -9  -1   88.99    7.00
   3  -9  -1   93.09    7.50
  -3   9  -1  103.89    8.10
   3   9   1  100.89    6.40
   3   9   1   95.99    9.00
  -3  -9   1   81.79    6.00
  -5   9   1    0.40    5.20
   5  -9   1    3.60    2.90
  -5   9  -1   -0.50    4.90
   5  -9  -1    1.00    2.60
   7  -9   1   51.99    5.50
   7  -9  -1   34.00    5.50
   0 -10   1   21.30    4.40
   0  10   1   25.00    7.20
   0  10  -1   18.10    6.30
   0 -10  -1   25.80    4.10
   0 -10   1   21.70    4.50
   0  10  -1   22.00    4.60
   0 -10  -1   28.80    5.20
   0 -10   1   21.10    3.80
   2 -10   1 1004.80   37.50
   2  10  -1  947.81   36.80
  -2  10   1  955.50   41.40
   2  10  -1  975.60   39.70
  -2 -10  -1  993.10   36.30
   2  10   1  995.60   36.50
  -2 -10   1 1025.70   36.10
   2 -10  -1  987.70   37.50
  -2 -10   1 1007.00   36.30
   2  10   1 1019.30   40.30
   2 -10  -1  962.50   37.20
  -2  10  -1  945.31   40.90
   4  10  -1   24.40    6.70
  -4  10   1   37.90    8.60
   4 -10   1   32.70    5.60
  -4  10  -1   13.20    6.60
   4  10   1   47.10    4.70
   4 -10  -1   31.70    5.60
   4  10   1   31.90    7.10
   6 -10   1  551.44   25.20
  -6  10   1  610.34   29.00
  -6  10  -1  635.14   29.30
   6 -10  -1  582.14   25.30
   1 -11   1   60.59    6.50
  -1  11   1   39.60    6.90
   1  11  -1   52.19    5.90
  -1 -11  -1   36.50    5.50
   1  11  -1   24.00   11.00
  -1 -11  -1   53.89    4.80
  -1 -11  -1   57.19    5.70
   1 -11   1   36.10    6.10
  -1 -11   1   52.89    5.20
   1 -11  -1   44.50    6.70
  -1  11  -1   43.10    9.10
  -1  11  -1   39.40    8.80
   1  11   1   24.70    5.30
   1  11   1   47.50   12.90
  -1 -11   1   35.50    5.70
   1 -11  -1   35.80    5.80
  -3  11   1   18.70    7.80
   3 -11   1   25.90    5.80
  -3 -11  -1   18.80    4.20
   3  11  -1   12.90    8.30
   3  11   1   28.30    4.50
  -3 -11   1   17.90    4.00
   3  11   1    3.30    7.30
   3 -11  -1   14.40    4.50
  -3  11  -1   20.10    7.10
  -5  11   1   42.60    9.60
   5 -11   1   43.30    6.90
   5 -11  -1   42.10    6.80
  -5  11  -1   64.19   10.70
   0 -12  -1    5.50    3.70
   0  12  -1   -2.50    5.00
   0  12   1    2.40    5.90
   0 -12   1    2.30    3.60
   0 -12  -1    3.20    3.90
   0  12   1   13.80    4.40
   0 -12   1   -1.80    3.00
   0 -12   1    6.90    3.50
   0  12  -1    8.90    4.10
   2  12  -1   90.29   12.40
  -2  12   1   77.19   12.50
   2 -12   1  102.89    8.90
  -2 -12  -1   98.79    7.70
  -2 -12   1  100.69    7.70
  -2 -12   1  107.89    7.80
   2 -12  -1   91.59    8.40
   2  12   1  113.29    8.20
   2  12   1  110.29   11.90
  -2  12  -1   90.59   13.10
   4  12  -1   42.90    8.70
   4 -12   1   50.99    7.80
  -4  12  -1   70.99   11.90
   4  12   1   53.99    9.20
   4  12   1   57.79    6.80
  -1  13   1   10.90    7.60
   1  13  -1    9.40    7.40
   1 -13   1   16.60    5.10
  -1 -13  -1   14.10    4.80
  -1 -13   1   13.10    4.50
  -1 -13   1    5.60    4.60
  -1  13  -1   16.50    7.90
   1 -13  -1   16.60    4.90
   1  13   1    2.10    6.60
   1  13   1   16.00    5.60
  -3 -13  -1   76.79    7.60
   3  13  -1  105.79   11.70
  -3  13   1   71.69   13.20
   3 -13   1   69.79    7.90
   3 -13  -1   69.69    8.00
   3  13   1   88.09   13.20
  -3 -13   1   84.79    7.20
  -3  13  -1   65.49   12.20
   3  13   1   76.29    8.30
   0   0  -2 1500.95   49.80
   0   0   2 1465.05   49.70
  -2   0  -2  294.17   38.00
  -2   0   2  309.57   33.70
  -2   0  -2  575.64  165.18
   2   0  -2  208.48  120.09
   2   0   2  323.77   37.70
  -2   0   2  276.47   32.90
  -4   0  -2 1418.06  277.87
   4   0   2 1066.79  259.97
  -4   0  -2 1759.32  102.49
  -4   0   2 1549.64   87.89
   4   0  -2 1410.36  256.47
   4   0   2 1593.44   96.89
  -4   0   2 1460.65   83.89
   8   0  -2  461.05   25.40
  -1   1   2  697.23   24.80
  -1   1   2  689.63   23.70
  -1  -1  -2  670.73   24.30
  -1  -1  -2  719.43   23.60
   1  -1   2  717.43   24.00
   1   1  -2  685.13   23.90
  -1   1  -2  696.73   24.00
   1   1   2  705.03   23.60
   1   1   2  711.93   24.60
   1  -1  -2  691.33   24.90
  -1  -1   2  682.43   23.60
  -1   1  -2  744.83   24.10
  -1  -1   2  716.83   23.90
   1  -1  -2  719.23   23.80
   3   1  -2  515.05   18.50
   5   1  -2  417.16   16.30
   7   1  -2   11.90    3.20
   9   1  -2    2.80    2.70
   9  -1  -2    2.10    3.00
   0  -2   2  939.61   31.20
   0   2   2  905.41   32.20
   0   2  -2  916.21   31.30
   0  -2  -2  937.61   31.10
   0  -2  -2  897.91   32.10
   0   2   2  933.81   31.10
   2   2  -2   17.90    2.20
  -2   2   2   18.90    3.50
  -2   2   2   21.90    2.30
   2  -2   2   18.70    2.60
   2  -2   2   23.60    2.60
   2  -2   2   22.60    2.90
  -2  -2   2   25.20    2.60
  -2   2  -2   25.80    3.20
   2  -2  -2   23.90    3.80
   2  -2  -2   18.30    2.10
   4  -2   2  433.46   15.70
   4   2  -2  412.16   16.80
   4  -2   2  422.86   16.10
   6   2  -2   39.20    4.00
   8   2  -2  131.89    8.10
  -1   3   2 1623.84   54.19
   1  -3   2 1582.74   54.49
   1   3  -2 1681.63   54.19
   1  -3   2 1572.74   54.39
   1  -3   2 1668.23   54.39
  -1  -3  -2 1568.54   54.49
  -1  -3  -2 1591.74   53.79
  -1   3   2 1552.14   55.69
  -1   3  -2 1626.34   54.59
   1  -3  -2 1681.13   54.29
  -1   3  -2 1673.63   54.89
   1   3   2 1601.64   55.19
   1  -3  -2 1571.34   55.49
   1   3   2 1621.34   53.89
  -1  -3   2 1635.24   53.99
  -1  -3   2 1615.04   54.09
   3  -3   2   89.09    5.40
   3   3  -2   79.79    4.50
   3  -3   2   81.09    5.10
  -3   3   2   79.99    4.50
  -3  -3   2   80.79    4.50
   3  -3  -2   80.09    5.90
  -3   3  -2   83.99    5.80
   5  -3   2  717.73   27.20
   5  -3   2  741.93   26.50
   5   3  -2  752.52   26.80
   7   3  -2   66.99    5.40
   0  -4   2 2062.19   70.09
   0  -4  -2 2115.39   69.89
   0   4  -2 2128.79   70.19
   0   4   2 2106.99   69.89
   0   4   2 2084.99   71.59
   0   4  -2 2094.09   70.59
   0  -4  -2 2056.19   70.89
   0  -4   2 2063.69   69.99
   0  -4   2 2104.79   69.99
   2  -4   2 2619.84   86.39
  -2   4   2 2562.44   85.09
  -2  -4  -2 2477.05   84.39
   2  -4   2 2598.44   85.79
   2   4  -2 2610.94   84.99
  -2   4   2 2380.46   86.89
   2  -4   2 2530.15   85.79
   2   4   2 2596.34   85.99
   2  -4  -2 2676.93   86.19
   2  -4  -2 2500.65   86.69
   2   4   2 2601.74   84.59
  -2   4  -2 2493.85   86.19
  -2  -4   2 2511.45   84.89
   4  -4   2 2547.25   85.89
   4  -4   2 2529.35   85.09
  -4   4   2 2534.65   84.79
   4   4  -2 2582.84   85.99
   4  -4  -2 2581.54   84.99
   4  -4  -2 2406.06   86.59
   6  -4   2 1333.17   47.80
   6   4  -2 1393.76   47.10
   6  -4   2 1340.17   46.80
   6  -4  -2 1299.37   48.50
   8   4  -2  983.10   36.30
  -1  -5  -2  720.23   27.50
  -1   5   2  784.62   27.40
  -1  -5  -2  766.82   27.10
   1  -5   2  795.82   27.60
   1   5  -2  751.12   27.20
   1   5  -2  744.03   27.80
   1  -5   2  802.52   28.00
   1   5  -2  772.22   27.50
  -1   5   2  703.33   31.30
   1  -5   2  806.62   27.80
   1  -5  -2  761.22   27.40
  -1   5  -2  826.72   30.40
  -1  -5   2  760.82   27.10
   1   5   2  744.23   28.90
   1  -5  -2  742.53   28.70
   1   5   2  784.42   27.10
  -1   5  -2  785.82   27.60
  -1  -5   2  775.52   27.10
   3  -5   2    3.80    2.10
   3  -5   2    4.30    2.20
   3   5  -2    3.70    1.70
  -3   5  -2    4.40    3.30
  -3  -5   2    7.60    2.00
   5   5  -2  420.86   16.90
   5  -5   2  418.26   18.10
   5  -5   2  456.45   17.40
  -5   5   2  428.36   17.10
   5  -5  -2  424.36   17.20
   5  -5  -2  411.16   18.80
   7  -5   2   62.49    5.80
   7  -5  -2   69.89    6.70
   0   6  -2 1366.46   49.30
   0   6  -2 1420.36   48.60
   0   6   2 1400.16   48.00
   0  -6  -2 1376.46   49.10
   0  -6   2 1410.76   48.20
   0   6   2 1376.46   50.39
   0   6  -2 1395.16   48.30
   0  -6   2 1368.66   48.30
   0  -6  -2 1427.36   48.10
   0  -6   2 1396.26   48.20
  -2   6   2  429.86   19.60
  -2  -6  -2  444.76   16.40
   2  -6   2  443.66   17.60
  -2   6   2  437.66   17.10
   2  -6   2  411.26   17.60
   2  -6   2  438.16   17.30
  -2   6  -2  427.86   18.80
   2   6   2  408.16   23.20
   2  -6  -2  451.35   18.80
  -2  -6   2  411.76   16.20
  -2  -6   2  440.36   16.60
   2   6   2  436.76   16.40
   2  -6  -2  431.46   17.10
   4  -6   2  607.64   25.10
   4  -6   2  644.24   25.50
  -4   6   2  648.64   26.90
   4   6  -2  633.44   23.70
   4  -6   2  649.43   24.40
  -4   6   2  597.94   23.90
   4  -6  -2  647.74   24.30
  -4   6  -2  644.54   26.40
   4  -6  -2  617.34   25.90
  -4  -6   2  666.93   23.50
   6  -6   2  151.98    9.60
   6  -6   2  172.88   10.50
   6  -6  -2  169.98   10.00
  -1   7   2  299.07   13.20
   1  -7   2  319.97   13.40
   1   7  -2  308.47   13.10
  -1  -7  -2  315.87   13.40
   1  -7   2  309.27   13.30
  -1  -7  -2  325.47   13.00
   1   7  -2  300.47   13.30
   1   7  -2  309.07   14.30
  -1   7   2  299.17   15.90
   1  -7   2  305.37   13.70
   1  -7  -2  301.27   13.10
   1  -7  -2  299.97   13.10
   1   7   2  309.37   12.80
  -1   7  -2  319.47   15.10
  -1  -7   2  302.47   12.80
   1   7   2  315.17   15.50
   1  -7  -2  300.47   14.40
  -1   7  -2  303.57   14.20
  -1  -7   2  284.97   12.70
   3  -7   2   42.10    4.80
   3  -7   2   44.30    4.80
   3   7  -2   46.30    4.50
  -3   7   2   63.99    5.00
   3   7  -2   58.99    5.40
  -3  -7  -2   37.90    3.80
   3  -7   2   50.79    6.40
   3  -7  -2   70.39    6.80
  -3   7  -2   51.99    7.40
  -3  -7   2   56.99    4.40
  -3  -7   2   47.00    3.90
   3   7   2   55.49    7.00
   3   7   2   47.20    4.00
  -5   7   2  276.87   16.10
   5  -7   2  298.87   13.70
   5  -7   2  268.77   14.20
   5  -7   2  314.47   15.30
   5  -7  -2  298.77   15.30
  -5   7  -2  286.97   15.90
   5  -7  -2  296.37   13.70
   7  -7   2   30.60    5.00
   7  -7  -2   38.00    5.40
   0  -8   2  323.87   14.70
   0  -8   2  340.77   14.60
   0   8   2  318.07   14.40
   0  -8  -2  365.66   14.80
   0  -8   2  344.27   14.70
   0   8  -2  333.37   15.40
   0   8   2  331.57   17.60
   0   8  -2  357.46   16.90
   0  -8  -2  342.67   14.20
   0  -8  -2  341.47   15.50
   2  -8   2   40.60    4.60
  -2   8   2   39.00    4.50
   2  -8   2   42.60    4.80
   2  -8   2   38.10    5.40
  -2  -8  -2   41.00    4.20
   2   8  -2   47.50    6.40
  -2  -8  -2   35.50    4.00
  -2   8   2   47.30    7.80
   2   8  -2   39.30    4.90
   2  -8  -2   49.70    7.00
  -2  -8   2   39.80    4.10
  -2   8  -2   42.80    7.40
   2  -8  -2   42.40    5.40
  -2  -8   2   41.30    4.30
  -2   8  -2   41.60    5.50
   2   8   2   40.90    4.10
   2   8   2   48.50    7.40
   2  -8  -2   47.50    4.80
   4  -8   2  432.06   18.50
  -4   8   2  397.46   21.40
   4   8  -2  419.46   18.50
   4  -8   2  422.76   20.20
   4  -8  -2  438.26   20.70
   4  -8  -2  429.56   18.40
   4   8   2  427.66   19.90
  -4  -8   2  431.16   17.20
  -4   8  -2  461.65   21.70
   6  -8   2    4.90    3.20
   6  -8  -2    6.50    3.30
   1   9  -2   69.39    6.00
  -1  -9  -2   78.09    6.30
   1  -9   2   78.79    6.20
   1  -9   2   74.69    6.30
  -1   9   2   85.09    9.60
   1  -9   2   78.29    6.50
  -1   9   2   65.49    5.90
   1   9  -2   76.99    8.00
  -1  -9  -2   77.29    5.90
   1   9   2   73.69    9.80
   1  -9  -2   76.29    6.20
  -1  -9   2   74.59    6.10
   1  -9  -2   71.99    5.90
   1   9   2   83.59    6.00
  -1  -9   2   69.69    5.60
   1  -9  -2   81.19    7.10
  -1   9  -2   84.19   10.60
  -1   9  -2   74.99    6.30
  -3  -9  -2   10.50    3.10
   3   9  -2   11.20    4.40
   3   9  -2    7.90    3.20
   3  -9   2   13.80    3.80
  -3   9   2    3.80    5.40
   3   9   2    9.00    3.10
   3  -9  -2    7.90    3.40
   3   9   2    8.70    5.20
   3  -9  -2   18.10    4.10
  -3   9  -2    6.90    5.00
   5  -9   2   84.19    7.40
  -5   9   2  109.39   11.40
   5  -9  -2   84.79    7.30
  -5   9  -2   90.79   11.40
   0 -10  -2   37.00    5.60
   2 -10   2   35.30    7.40
  -2  10   2   37.50    9.00
   2 -10   2   35.70    6.00
  -2 -10  -2   31.40    4.80
  -2 -10  -2   34.80    4.70
   2 -10  -2   44.20    8.10
   2  10   2   43.10    4.90
   2 -10  -2   32.70    5.40
   2  10   2   26.00    7.00
  -2  10  -2   24.00    7.30
   2 -10  -2   34.10    5.30
   4 -10   2   41.10    6.20
  -4  10   2   41.20    9.20
   4  10  -2   39.10    7.00
   4 -10  -2   36.20    6.10
  -4  10  -2   45.90    8.90
   4  10   2   28.00    7.40
  -6  10   2   14.40    6.80
   6 -10   2    6.10    4.00
   6 -10  -2    7.80    4.30
  -6  10  -2   15.00    5.90
   1 -11   2  197.88   12.10
   1 -11   2  215.98   12.30
   1  11  -2  214.58   18.30
  -1 -11  -2  216.18   10.50
  -1 -11  -2  240.48   11.80
  -1 -11  -2  204.88   11.50
  -1  11   2  214.18   15.80
   1 -11   2  243.28   12.50
  -1  11   2  194.78   11.60
  -1 -11   2  199.68   11.70
   1 -11  -2  185.58   11.60
   1 -11  -2  235.18   13.00
   1 -11  -2  209.88   11.40
  -1  11  -2  203.18   15.00
   1  11   2  220.48   16.20
  -1 -11   2  220.08   11.30
   1  11   2  218.78   11.60
   3  11  -2    1.10   10.30
  -3 -11  -2   -0.20    3.00
  -3  11   2    5.30    6.60
   3 -11   2    4.90    3.50
   3 -11  -2   -0.50    3.00
  -3 -11   2   -0.90    2.50
   3  11   2   -0.10    2.80
  -3 -11   2    2.80    2.90
  -3  11  -2   -2.40    4.80
  -5  11   2  218.78   17.60
   5 -11   2  207.58   12.90
   5 -11  -2  202.48   12.60
   5  11   2  217.28   16.30
  -5  11  -2  204.68   16.30
   0 -12   2  583.24   24.60
   0 -12  -2  588.34   24.80
   0 -12   2  528.35   23.50
   0 -12  -2  550.64   23.90
   0  12   2  556.04   24.10
   0  12   2  583.04   29.40
   0  12  -2  536.35   28.00
  -2  12   2  264.47   19.60
   2  12  -2  272.97   18.00
   2 -12   2  287.67   15.50
  -2 -12  -2  314.07   14.60
   2  12   2  283.37   18.60
  -2  12  -2  281.57   18.70
   2 -12  -2  257.97   14.80
  -2 -12   2  275.07   14.00
   2  12   2  295.17   14.60
  -4  12   2  558.24   29.80
   4  12  -2  569.74   27.00
   4 -12   2  525.25   24.60
   4  12   2  517.75   22.80
  -4  12  -2  546.75   29.20
   4  12   2  594.44   28.20
   4 -12  -2  520.05   24.40
  -1  13   2   86.39   13.20
  -1 -13  -2   81.49   11.20
   1  13  -2  107.69   12.00
   1 -13   2  101.49    9.10
  -1 -13  -2   79.69    7.70
   1  13   2   70.39   12.30
  -1 -13   2   97.49    7.90
  -1  13  -2   90.69   13.90
   1  13   2   72.89    8.60
   1 -13  -2   88.99    8.20
   3  13  -2   12.00    7.40
  -3 -13  -2   24.10    5.10
   3 -13   2   10.30    5.10
  -3  13   2   12.70    8.90
  -3 -13   2   12.60    4.20
  -3 -13   2   15.20    4.40
   3  13   2    9.80    5.10
   3  13   2    8.40    7.50
   3 -13  -2   18.40    5.20
  -3  13  -2   10.20    7.70
   0   0  -3    0.40    0.90
   0   0   3   -0.50    2.00
   0   0  -3    1.90    2.40
   0   0  -3    1.00    1.00
   0   0   3    0.40    0.90
   0   0   3    0.10    0.80
   2   0   3   -0.60    1.00
   2   0  -3    0.70    1.00
   2   0   3    0.00    2.10
   2   0  -3   -0.20    2.00
   2   0  -3   -0.40    1.20
   4   0  -3    1.50    1.60
   6   0  -3    1.50    2.10
   8   0  -3    2.10    2.10
  -1  -1  -3  819.92   28.60
  -1   1   3  825.72   28.70
   1  -1   3  836.22   28.80
  -1   1   3  872.51   30.20
   1   1  -3  879.01   29.00
  -1  -1  -3  802.32   29.80
   1   1  -3  878.71   28.80
  -1   1  -3  860.31   28.90
   1   1   3  835.52   28.70
  -1  -1   3  846.12   28.90
  -1  -1   3  846.52   28.70
   1  -1  -3  853.01   28.80
   1   1   3  847.12   30.20
  -1   1  -3  882.61   30.30
   1  -1  -3  856.51   30.30
   3   1  -3  354.06   13.50
   3  -1  -3  353.86   12.90
   5   1  -3  237.08   10.60
   7   1  -3  117.79    7.50
   7  -1  -3  113.29    7.60
   9   1  -3   68.49    6.50
   9  -1  -3   81.59    7.00
   0  -2   3 2102.69   69.39
   0   2   3 2112.19   69.19
   0  -2  -3 2029.70   70.59
   0   2   3 2106.39   70.89
  -2   2   3 1955.40   65.69
   2  -2   3 2001.10   66.19
  -2  -2  -3 1936.41   65.39
  -2   2   3 1880.41   67.19
   2   2  -3 1991.80   65.99
  -2   2  -3 2031.60   66.39
   2   2   3 2036.30   65.39
   2   2   3 1989.40   66.89
   2  -2  -3 1955.20   65.69
   2  -2  -3 1960.90   67.49
  -2  -2   3 1975.70   65.99
   4  -2   3  925.11   34.00
   4   2  -3  999.90   34.30
   4  -2   3  987.40   33.90
   4  -2  -3  980.20   33.50
   6   2  -3  588.24   22.60
  -1   3   3  135.79    8.30
   1  -3   3  139.29    6.50
   1  -3   3  140.59    6.50
  -1  -3  -3  136.89    6.00
  -1   3   3  133.69    6.10
   1   3  -3  145.59    6.30
  -1  -3  -3  132.29    7.20
   1   3   3  133.09    7.70
  -1  -3   3  128.99    6.10
   1   3   3  137.09    6.00
   1  -3  -3  133.29    6.20
  -1   3  -3  141.29    6.90
   1  -3  -3  138.59    7.90
  -1   3  -3  141.29    6.70
   3  -3   3   29.60    3.40
   3  -3   3   31.60    3.40
  -3   3   3   25.80    2.70
   3   3  -3   31.10    3.10
   3  -3   3   36.60    3.80
  -3  -3   3   34.40    3.10
  -3   3  -3   33.70    4.10
   3  -3  -3   33.60    3.00
   3  -3  -3   34.00    5.00
   5  -3   3   95.69    5.60
   5   3  -3   88.39    5.60
   5  -3   3   95.09    7.20
   5  -3  -3   98.89    5.40
   5  -3  -3   94.69    7.20
   7   3  -3   40.50    4.40
   0   4   3  295.27   13.40
   0   4   3  281.47   11.20
   0  -4   3  294.37   11.50
   0  -4  -3  272.77   11.10
   0   4  -3  287.07   11.60
   0  -4   3  290.47   11.50
   0  -4  -3  275.27   12.60
  -2   4   3  335.37   13.30
   2  -4   3  377.36   14.00
   2  -4   3  353.86   14.00
   2   4  -3  347.47   13.30
  -2  -4  -3  326.57   12.70
  -2   4   3  323.97   15.50
   2  -4   3  354.06   13.70
   2  -4  -3  324.27   15.10
  -2  -4   3  328.27   13.20
   2  -4  -3  339.77   13.40
   2   4   3  320.47   14.50
  -2   4  -3  354.06   14.50
   4  -4   3    6.90    2.50
  -4   4   3    8.60    2.30
   4  -4   3    7.60    2.40
   4   4  -3    4.50    2.00
   4  -4  -3    2.70    3.30
   4  -4  -3    4.80    2.00
   6   4  -3   10.20    2.80
   6  -4   3    9.20    3.10
   6  -4   3    4.50    3.00
   6  -4  -3   10.70    2.70
   6  -4  -3   19.30    4.30
   8   4  -3   11.30    3.00
   1  -5   3   76.39    5.00
   1   5  -3   84.39    5.50
   1  -5   3   80.19    5.30
  -1  -5  -3   79.79    5.60
  -1   5   3   86.99    7.30
  -1  -5  -3   75.79    4.60
  -1   5   3   80.59    4.90
   1   5  -3   79.29    5.10
  -1  -5   3   82.49    4.80
  -1   5  -3   72.89    5.40
  -1   5  -3   72.39    6.00
   1   5   3   76.29    6.60
  -1  -5   3   83.79    4.90
   1   5   3   74.19    4.50
   1  -5  -3   80.49    6.40
   3  -5   3   77.29    5.60
  -3   5   3   77.29    4.90
   3   5  -3   71.79    4.90
   3  -5   3   73.29    5.60
  -3   5   3   81.39    7.50
   3  -5   3   76.69    5.20
   3  -5  -3   74.19    5.10
   3   5   3   75.49    4.30
  -3  -5   3   74.39    4.80
  -3   5  -3   69.99    6.50
   3   5   3   71.59    6.20
   3  -5  -3   77.09    7.00
  -5   5   3   61.49    4.80
   5  -5   3   53.49    5.50
   5  -5   3   66.19    6.00
   5   5  -3   68.29    5.10
   5  -5   3   62.19    5.20
   5  -5  -3   69.29    6.80
   5  -5  -3   71.69    5.30
   7  -5   3   44.30    4.70
   7  -5   3   39.80    7.60
   7   5  -3   43.30    4.70
   7  -5  -3   51.89    7.10
   0   6  -3 1388.96   48.20
   0   6   3 1351.76   49.50
   0  -6   3 1338.67   47.00
   0   6   3 1341.07   46.80
   0  -6  -3 1313.27   46.20
   0  -6  -3 1299.87   48.00
   0  -6   3 1377.76   47.10
   0   6  -3 1399.66   47.50
  -2  -6  -3  940.41   34.20
  -2   6   3  991.90   37.80
   2  -6   3  982.50   35.20
  -2  -6  -3  979.80   34.10
   2   6  -3  984.00   35.20
   2   6  -3 1006.80   34.80
   2  -6   3  934.01   34.80
  -2   6   3  964.40   34.60
   2  -6   3  925.01   35.20
  -2  -6   3  960.30   34.30
   2  -6  -3  976.90   36.80
   2   6   3  979.80   36.70
  -2  -6   3  940.71   33.90
  -2   6  -3  956.90   36.30
   2   6   3 1003.70   34.20
   2  -6  -3 1007.30   34.90
  -4   6   3  651.43   27.30
   4  -6   3  674.93   26.00
   4  -6   3  661.93   24.90
  -4   6   3  630.04   24.30
   4   6  -3  652.53   24.30
   4  -6   3  598.54   25.20
  -4   6  -3  633.04   26.50
  -4  -6   3  652.13   24.30
   4  -6  -3  654.53   24.70
   4  -6  -3  636.24   26.70
   6  -6   3  380.66   17.20
   6   6  -3  342.07   15.10
   6  -6   3  330.97   17.90
   6  -6  -3  324.57   16.90
   1   7  -3  214.68   10.40
   1  -7   3  202.68   10.20
   1  -7   3  223.38   10.50
   1   7  -3  208.18   11.20
  -1  -7  -3  208.38   10.80
  -1   7   3  200.48    9.90
  -1  -7  -3  208.58   10.50
   1  -7   3  216.48   10.60
  -1   7   3  218.38   13.20
  -1  -7   3  220.08   10.00
   1  -7  -3  210.18   11.50
   1   7   3  209.88    9.80
   1   7   3  203.18   12.50
   1  -7  -3  226.08   10.30
  -1   7  -3  217.48   12.00
  -3   7   3   68.29    5.50
  -3   7   3   79.29    8.80
   3  -7   3   79.89    6.60
   3   7  -3   80.59    6.30
  -3  -7  -3   73.69    4.90
   3   7  -3   81.69    5.90
   3  -7   3   74.29    6.00
   3  -7   3   74.59    6.00
   3   7   3   76.49    7.70
  -3   7  -3   83.09    9.60
   3   7   3   71.49    5.00
   3  -7  -3   74.59    7.40
   3  -7  -3   89.99    6.20
  -3  -7   3   80.09    5.40
   5  -7   3  143.49    8.80
   5  -7   3  136.29   13.20
   5  -7   3  143.89    9.60
  -5   7   3  141.19   11.50
   5   7  -3  137.89    8.10
  -5   7  -3  119.49   10.40
   5  -7  -3  141.09    8.60
   5  -7  -3  146.19   10.50
   7  -7   3   60.19    6.10
   7  -7  -3   61.39    5.80
   0  -8  -3  722.43   26.20
   0  -8  -3  642.54   26.90
   0   8   3  683.63   26.00
   0  -8  -3  685.03   25.40
   0   8  -3  709.03   26.90
   0  -8   3  675.73   26.20
   0   8   3  684.93   29.50
   0   8  -3  691.93   28.10
   0  -8   3  678.93   26.10
   2  -8   3  132.19    8.40
   2   8  -3  151.88    9.50
  -2   8   3  142.49   11.60
  -2  -8  -3  139.19    7.80
  -2   8   3  138.99    8.20
   2  -8   3  134.39    8.50
   2   8  -3  150.08    8.50
   2  -8   3  137.39    8.50
   2  -8  -3  143.99    9.80
   2   8   3  139.49    7.70
  -2   8  -3  146.49   10.70
  -2  -8   3  142.39    7.80
   2   8   3  151.18   10.90
   2  -8  -3  152.68    8.60
  -2  -8   3  149.88    8.00
   4   8  -3  100.19    7.60
   4   8  -3  104.49    7.30
   4  -8   3  105.89    7.60
  -4   8   3  118.79   11.30
  -4   8  -3  116.09   10.40
   4   8   3  104.29    9.80
  -4  -8   3  110.29    6.90
   4  -8  -3  103.89    7.60
   6  -8   3    2.80    3.10
   6  -8  -3   -1.10    2.50
   1   9  -3  228.48   13.50
  -1  -9  -3  202.98   11.50
   1  -9   3  221.48   11.80
  -1  -9  -3  215.88   10.90
   1  -9   3  214.38   11.30
   1   9  -3  236.98   12.00
   1  -9   3  211.58   11.50
  -1   9   3  224.08   11.40
  -1   9   3  245.58   15.50
   1   9   3  229.78   14.70
   1   9   3  209.88   10.90
  -1  -9   3  246.08   11.40
  -1   9  -3  212.28   13.80
   1  -9  -3  225.68   12.70
  -1  -9   3  232.58   11.30
   1  -9  -3  236.38   11.40
   1  -9  -3  228.18   11.40
  -3   9   3  207.28   15.10
  -3   9   3  208.88   12.00
   3   9  -3  209.18   12.30
   3  -9   3  207.38   11.50
   3   9  -3  208.18   11.10
  -3  -9  -3  209.08   10.20
  -3   9  -3  192.68   13.70
  -3  -9   3  199.68   10.40
   3   9   3  203.88   13.70
  -3  -9   3  197.98   10.10
   3   9   3  218.68   10.40
   3  -9  -3  212.78   11.40
  -5   9   3  162.48   12.90
   5  -9   3  146.59    9.70
   5   9  -3  135.19    8.90
   5  -9  -3  139.39    9.50
   5   9   3  158.78   11.80
  -5   9  -3  139.49   12.30
  -5  -9   3  148.09    8.40
   0 -10   3  402.56   17.70
   0 -10  -3  383.76   16.60
   0  10   3  380.36   17.20
   0  10   3  389.66   21.50
   0 -10   3  381.66   17.20
   0 -10  -3  402.76   18.40
   0  10  -3  413.06   20.70
   0 -10  -3  394.96   17.40
   2  10  -3  395.66   20.20
   2  10  -3  403.36   18.40
   2 -10   3  413.76   18.70
  -2 -10  -3  427.46   17.70
  -2  10   3  414.96   18.50
   2 -10   3  402.86   18.70
   2 -10   3  404.26   19.70
   2 -10  -3  413.26   19.80
  -2 -10   3  416.26   17.70
   2  10   3  398.46   17.50
   2 -10  -3  406.86   18.40
   2  10   3  379.76   21.30
   2 -10  -3  425.56   18.50
  -2 -10   3  421.56   17.70
  -4  10   3  246.38   16.50
   4 -10   3  191.88   11.90
   4  10  -3  217.98   13.00
  -4  10  -3  202.58   15.00
   4  10   3  236.88   15.10
   4 -10  -3  178.08   11.50
   4  10   3  204.48   10.30
  -4 -10   3  209.68   10.60
   6 -10   3  150.18   10.50
  -6  10   3  208.28   15.60
   6 -10  -3  168.48   10.90
  -6  10  -3  179.08   14.40
   1 -11   3   75.09    8.80
  -1  11   3   74.69    6.90
   1  11  -3   64.39    9.90
  -1  11   3   64.79   11.70
  -1 -11  -3   87.09    7.30
  -1 -11  -3   61.49    6.30
   1 -11   3   71.59    6.50
   1 -11  -3   74.69    7.60
   1 -11  -3   80.39    6.60
  -1 -11   3   63.49    6.80
   1 -11  -3   67.99    6.80
   1  11   3   72.49    6.60
   1  11   3   60.29   10.40
  -1  11  -3   69.19   11.10
  -3 -11  -3   15.50    4.00
   3 -11   3   18.20    4.90
  -3  11   3   12.50    7.70
   3  11  -3    8.20    3.80
   3  11  -3   10.20    8.20
   3  11   3   15.40    4.00
  -3 -11   3   16.50    4.90
   3  11   3   11.30    6.60
  -3 -11   3   20.70    4.10
  -3  11  -3    9.00    6.30
   3 -11  -3    7.00    3.80
  -5  11   3   72.59   12.40
   5 -11   3   67.69    7.40
   5  11  -3   55.69    9.00
   5  11   3   76.99   11.40
   5 -11  -3   61.39    7.20
  -5  11  -3   58.99   10.30
   0  12   3  241.58   17.40
   0 -12  -3  226.48   12.70
   0  12  -3  193.58   15.70
   0 -12  -3  209.78   14.90
   0  12   3  222.08   12.50
   0 -12  -3  220.78   11.40
   0 -12   3  213.58   12.80
   2  12  -3  369.86   20.80
  -2  12   3  338.07   22.00
  -2 -12  -3  351.56   16.70
  -2 -12  -3  373.36   16.30
   2 -12   3  318.27   17.60
   2  12   3  353.46   16.70
  -2 -12   3  372.66   17.20
   2  12   3  367.96   21.90
  -2  12  -3  308.17   20.70
  -2 -12   3  347.27   16.40
   2 -12  -3  324.77   17.20
   4  12  -3    6.90    6.70
  -4  12   3   14.50    9.00
   4 -12   3   21.10    5.50
   4  12  -3   10.30    5.30
   4  12   3   16.20    8.40
   4  12   3   19.10    4.80
   4 -12  -3    7.00    4.20
  -4  12  -3   16.30    7.80
  -4 -12   3    7.40    4.10
  -1  13   3   35.70   10.10
   1 -13   3   55.99    8.50
   1  13  -3   50.69   10.70
   1 -13  -3   45.50    7.20
  -1  13  -3   56.69   10.60
   1  13   3   33.50    9.90
  -1 -13   3   54.19    8.20
   0   0  -4 1899.01   63.09
   0   0   4 1862.21   63.29
   0   0   4 1931.31   64.79
   0   0  -4 1896.51   63.39
   0   0   4 1908.81   63.09
   0   0  -4 1931.51   65.09
   2   0   4  620.74   22.30
   2   0   4  622.84   20.80
  -2   0  -4  549.54   21.90
   2   0  -4  569.24   20.40
   2   0  -4  580.74   22.00
   2   0  -4  583.44   20.90
   4   0  -4 3654.23  121.69
   6   0  -4 2151.38   74.09
   8   0  -4 1383.06   50.39
  -1  -1  -4  408.46   17.20
  -1   1   4  423.96   15.60
   1   1  -4  464.45   17.20
   1   1  -4  446.76   15.80
   1   1  -4  442.66   15.60
  -1   1   4  436.56   17.30
   1  -1   4  440.46   15.90
   1  -1   4  449.46   15.60
  -1  -1  -4  426.16   15.50
  -1   1  -4  428.66   17.30
   1  -1  -4  445.76   15.60
   1  -1  -4  435.96   17.60
   1   1   4  438.66   17.40
   1  -1  -4  411.06   15.50
  -1   1  -4  423.56   15.60
  -1  -1   4  434.36   15.80
   1   1   4  438.56   15.60
  -1  -1   4  442.16   15.60
   3  -1   4 1834.92   59.89
   3  -1   4 1882.71   59.89
  -3   1   4 1715.43   59.19
   3  -1  -4 1702.33   61.29
   3   1   4 1737.93   60.89
   3  -1  -4 1724.93   59.29
   3   1   4 1817.72   59.29
   5   1  -4   57.99    4.60
   5  -1   4   57.69    4.70
   7  -1   4  196.98   10.20
   7   1  -4  175.68    9.80
   7  -1  -4  177.48   10.20
   0   2  -4 1423.56   46.90
   0  -2   4 1399.26   46.80
   0  -2  -4 1353.76   46.10
   0  -2  -4 1378.06   46.70
   0   2   4 1367.96   48.70
   0  -2   4 1426.76   47.00
   0  -2  -4 1353.06   48.60
   0   2   4 1382.36   46.70
  -2  -2  -4  358.26   13.20
   2  -2   4  347.17   13.80
  -2   2   4  372.76   15.40
  -2  -2  -4  350.46   14.30
  -2   2   4  350.86   13.40
   2   2  -4  366.86   13.80
   2  -2  -4  367.26   13.60
  -2  -2   4  350.76   13.10
  -2   2  -4  355.16   15.30
  -2  -2   4  374.56   13.80
   2   2   4  356.86   13.20
  -2   2  -4  368.16   14.10
   2  -2  -4  377.56   15.80
   2   2   4  371.76   15.30
   4  -2   4  556.14   20.80
   4   2  -4  558.24   20.60
  -4   2   4  537.05   19.60
   4  -2  -4  510.25   21.80
   4  -2  -4  558.94   19.80
   6  -2   4  162.88    8.90
   6   2  -4  142.19    8.30
   8   2  -4  153.98    9.40
   8  -2   4  170.68   10.40
   8  -2  -4  151.48    9.90
  -1   3   4  141.69    8.90
   1  -3   4  142.79    6.90
  -1   3   4  148.59    6.70
  -1  -3  -4  149.39    6.50
  -1  -3  -4  145.69    8.10
   1   3  -4  140.99    6.80
   1   3   4  142.69    8.50
   1  -3  -4  147.69    6.70
   1  -3  -4  144.09    8.60
  -1   3  -4  156.88    7.10
  -1  -3   4  141.99    6.70
  -1   3  -4  143.39    7.20
   1   3   4  146.49    6.50
   3  -3   4  319.77   13.40
  -3   3   4  323.57   14.70
  -3   3   4  331.37   12.80
   3   3  -4  340.57   13.20
   3  -3   4  316.77   13.20
  -3   3  -4  321.47   13.60
  -3  -3   4  335.87   13.10
   3   3   4  321.57   12.20
   3  -3  -4  306.37   14.90
   3  -3  -4  338.47   12.90
  -3   3  -4  327.97   14.50
   5  -3   4   41.10    4.30
   5  -3   4   40.70    3.90
   5   3  -4   40.00    4.20
   5  -3   4   41.20    4.50
   5  -3  -4   48.30    3.90
   7   3  -4   18.10    3.90
   7  -3   4   24.50    4.70
   0  -4   4 2104.59   70.39
   0  -4  -4 2073.09   70.09
   0   4  -4 2100.79   70.59
   0   4   4 2066.49   72.69
   0   4   4 2059.69   70.19
   0   4  -4 2112.29   70.79
   0  -4   4 2116.99   70.59
   0  -4  -4 2082.19   72.09
   2   4  -4  865.11   33.70
  -2  -4  -4  836.92   30.00
   2  -4   4  811.12   30.10
  -2   4   4  838.92   29.70
   2  -4   4  815.42   30.10
  -2  -4  -4  819.92   29.20
   2  -4  -4  855.51   32.20
   2  -4  -4  863.21   29.80
   2   4   4  841.02   31.60
  -2  -4   4  841.12   29.80
  -2  -4   4  839.02   29.40
  -2   4  -4  829.52   30.70
   2   4   4  862.01   29.30
   4  -4   4   20.20    3.70
   4  -4   4   17.30    3.10
   4  -4   4   20.30    3.70
  -4   4   4   16.00    2.80
  -4   4   4   19.70    6.50
   4   4  -4   12.40    2.80
  -4  -4   4   18.50    3.60
   4  -4  -4   14.60    2.90
   4  -4  -4   18.40    4.60
  -4   4  -4   20.90    4.50
  -4   4  -4   19.60    4.20
   6   4  -4 1259.37   44.30
   6  -4   4 1134.99   44.20
   6  -4   4 1258.67   43.90
   6  -4   4 1284.27   45.70
   6  -4  -4 1205.48   46.10
   6  -4  -4 1276.17   43.60
   8  -4  -4   39.80    7.70
  -1  -5  -4   16.00    3.60
   1  -5   4   14.40    2.80
   1  -5   4   13.60    3.00
  -1   5   4   12.20    4.50
  -1   5   4   15.30    2.60
   1   5  -4   16.80    2.90
  -1  -5  -4   13.20    2.50
   1  -5  -4   13.20    3.90
  -1  -5   4   10.40    2.40
   1   5   4   14.10    2.50
  -1  -5   4    8.60    2.20
  -1   5  -4   16.30    3.70
   1  -5  -4   14.00    2.60
  -1   5  -4   16.40    3.30
   1   5   4   11.30    4.00
   3  -5   4  152.38    8.40
  -3  -5  -4  158.28    7.10
   3  -5   4  142.79    8.20
   3  -5   4  155.28    8.10
  -3   5   4  153.98   10.40
  -3   5   4  162.98    7.90
   3   5  -4  155.18    7.90
  -3   5  -4  143.39    9.20
   3  -5  -4  164.68    8.00
  -3  -5   4  157.68    7.80
   3   5   4  160.18    9.90
   3   5   4  150.78    7.10
   3  -5  -4  158.08   10.00
  -5   5   4   11.20    2.90
   5  -5   4    4.60    2.40
   5   5  -4    7.60    2.60
   5  -5   4    1.20    2.40
   5  -5   4    3.80    2.80
   5  -5  -4    8.70    2.70
   5  -5  -4    9.80    4.40
   7  -5   4   13.40    3.50
   7   5  -4   14.80    3.50
   0  -6  -4   63.29    6.10
   0   6   4   63.79    4.60
   0   6  -4   53.69    4.90
   0  -6  -4   66.89    4.70
   0  -6   4   58.49    8.10
   0  -6   4   58.59    5.30
   0   6   4   62.39    7.10
   0   6  -4   53.89    5.50
   2   6  -4   10.00    3.10
   2  -6   4   16.30    3.30
   2  -6   4   17.80    3.80
  -2   6   4   15.20    3.20
   2   6  -4   20.60    3.40
  -2  -6  -4   19.30    3.40
  -2  -6  -4   18.10    2.90
  -2   6   4   11.00    4.70
   2  -6   4   13.60    3.00
   2   6   4   14.60    4.50
  -2  -6   4   19.20    2.90
  -2   6  -4   14.20    3.90
   2  -6  -4    9.70    3.80
   2  -6  -4   15.80    3.10
   2   6   4   19.30    3.00
   4   6  -4   58.29    5.10
   4  -6   4   60.19    5.60
   4  -6   4   66.09    6.00
  -4   6   4   60.89    5.00
  -4   6   4   76.49    9.30
   4  -6   4   56.59    5.20
  -4   6  -4   78.29    8.90
   4  -6  -4   67.69    8.50
   4  -6  -4   58.09    5.20
  -4  -6   4   62.69    5.20
   6  -6   4   21.30    5.00
   6   6  -4   22.10    4.10
  -6   6   4   32.00    4.40
   6  -6   4   27.30    5.00
   6  -6   4   28.10    4.80
   6  -6  -4   32.20    4.70
   8   6  -4   23.40    4.40
  -1   7   4  192.28   12.80
  -1  -7  -4  213.48    9.90
   1  -7   4  202.98   10.10
  -1   7   4  197.38    9.90
   1   7  -4  205.98   10.30
   1  -7   4  212.18   10.30
   1   7  -4  207.48   11.00
  -1  -7  -4  186.68   11.40
   1   7   4  200.98   12.80
  -1   7  -4  225.28   11.80
   1  -7  -4  193.28    9.80
   1  -7  -4  196.18   11.50
  -1   7  -4  227.38   11.00
  -1  -7   4  193.48    9.80
  -1  -7   4  193.88   11.00
   1   7   4  198.58    9.60
  -3   7   4  774.12   32.80
   3   7  -4  825.82   29.30
   3   7  -4  799.82   29.30
   3  -7   4  735.13   29.60
  -3   7   4  740.43   28.80
   3  -7   4  727.03   29.50
   3  -7   4  764.32   29.30
   3   7   4  772.52   28.10
  -3  -7   4  771.62   28.50
  -3   7  -4  814.52   31.60
   3  -7  -4  752.22   31.40
   3  -7  -4  784.72   29.20
   3   7   4  773.52   31.50
  -5   7   4   70.09    9.50
   5   7  -4   57.39    5.60
  -5   7   4   64.99    5.80
   5  -7   4   53.69    7.70
   5  -7   4   79.09    7.00
  -5   7  -4   66.79    8.80
  -5  -7   4   62.09    5.40
   7  -7   4  142.09    9.20
   7   7  -4  143.39    8.70
   7  -7  -4  135.89    8.80
   0   8  -4  664.93   26.30
   0  -8  -4  663.03   24.80
   0   8   4  646.94   25.40
   0   8   4  678.33   29.50
   0  -8  -4  655.33   25.40
   0   8  -4  685.03   27.50
   0  -8  -4  644.54   26.90
   0  -8   4  637.54   25.50
   0  -8   4  724.93   26.10
   2   8  -4  680.33   25.90
  -2   8   4  591.64   28.10
   2  -8   4  619.34   25.10
  -2  -8  -4  611.14   24.00
  -2   8   4  632.34   24.40
   2  -8   4  608.94   24.70
   2   8  -4  654.63   24.70
   2  -8   4  612.24   24.70
   2   8   4  583.84   27.30
   2   8   4  635.74   23.90
  -2   8  -4  625.94   26.80
  -2  -8   4  624.94   23.80
   2  -8  -4  609.34   24.40
   2  -8  -4  612.44   26.50
  -2  -8   4  626.54   24.00
  -4   8   4 1144.69   45.60
   4  -8   4 1149.98   42.50
   4  -8   4 1037.30   42.00
   4   8  -4 1167.88   41.80
   4   8  -4 1085.99   41.20
   4   8   4 1115.29   44.00
  -4  -8   4 1160.48   40.80
  -4   8  -4 1111.49   44.20
   4  -8  -4 1211.98   42.60
   4  -8  -4 1119.29   44.60
   4   8   4 1111.79   40.00
   6  -8   4  946.31   36.70
  -6   8  -4  950.70   38.70
   6  -8  -4  964.60   36.50
  -1   9   4   88.59    6.80
   1   9  -4   97.79    7.60
   1  -9   4   90.29    6.90
   1   9  -4   97.89    8.70
  -1  -9  -4   95.39    7.30
   1  -9   4  102.29    7.50
  -1  -9  -4   88.49    6.70
  -1   9   4  105.09   10.90
   1  -9  -4   86.99    6.60
   1   9   4   87.49    6.60
   1  -9  -4   96.29    7.10
   1  -9  -4  106.79    8.70
  -1   9  -4   99.49    9.20
  -1  -9   4   89.49    6.80
   1   9   4   96.69   10.40
  -1  -9   4   96.59    7.20
  -3  -9  -4  201.38   10.50
   3  -9   4  220.38   12.00
  -3   9   4  224.48   11.60
  -3   9   4  214.68   15.50
   3   9  -4  211.68   11.50
   3   9  -4  222.08   12.60
  -3  -9   4  196.98   10.40
   3  -9  -4  215.38   11.70
   3   9   4  224.68   10.80
  -3  -9   4  214.68   11.00
  -3   9  -4  216.48   14.60
   3   9   4  234.38   15.00
   5  -9   4   36.10    5.90
   5   9  -4   35.60    5.50
  -5   9   4   42.40    8.60
   5  -9  -4   37.20    5.70
   5   9   4   34.80    7.50
   0 -10  -4  605.14   24.40
   0  10   4  563.44   24.10
   0 -10  -4  605.94   25.60
   0  10   4  599.94   29.10
   0 -10   4  614.54   24.90
   0  10  -4  648.04   27.80
   0 -10  -4  590.34   23.30
  -2  10   4  355.86   21.80
  -2 -10  -4  352.66   15.90
   2  10  -4  342.67   16.90
   2 -10   4  384.36   17.00
   2 -10   4  361.36   17.10
  -2  10   4  361.06   16.40
  -2 -10  -4  356.96   15.90
   2  10  -4  337.97   18.20
   2  10   4  349.17   15.90
   2 -10  -4  368.36   18.40
   2 -10  -4  376.06   16.80
  -2 -10   4  350.86   16.00
   2 -10  -4  347.67   16.60
  -2  10  -4  353.66   19.90
  -2 -10   4  342.57   15.90
   2  10   4  336.17   20.10
   4  10  -4  334.17   16.30
   4 -10   4  347.27   17.10
  -4  10   4  361.16   21.50
   4  10  -4  353.36   17.70
   4 -10  -4  326.87   16.70
   4  10   4  353.56   19.80
   4  10   4  350.96   15.20
  -4  10  -4  336.77   20.10
  -6  10   4  192.68   15.40
   6 -10   4  151.38   12.00
  -6  10  -4  155.58   13.60
   6 -10  -4  151.28   10.80
   1 -11   4    3.20    3.50
   1 -11   4    1.40    2.80
  -1  11   4    9.20    6.10
  -1  11   4    1.40    3.10
  -1 -11  -4    3.20    3.30
  -1 -11  -4    6.80    4.10
   1  11  -4   -2.10    4.10
  -1 -11   4   -0.30    3.20
   1  11   4   -2.30    2.80
  -1 -11   4   -0.50    3.00
   1 -11  -4   -1.00    3.60
  -1  11  -4    2.60    5.00
   1 -11  -4   -2.60    3.10
   1  11   4   -4.30    5.20
  -3  11   4  120.99   13.40
   3  11  -4  122.09   10.80
   3  11  -4   98.09    8.40
   3 -11   4   90.19    8.50
  -3 -11  -4  111.29    7.80
   3  11   4  113.59    7.70
   3 -11  -4   96.49    8.40
   3  11   4  107.89   11.60
  -3  11  -4   91.39   13.00
  -3 -11   4  119.19    8.20
   5 -11   4    6.50    4.00
  -5  11   4   -0.50    6.90
   5  11  -4    3.70    3.40
   5  11  -4    0.70    4.90
  -5  11  -4    2.00    5.80
   5  11   4   -3.50    5.90
   5 -11  -4    2.90    3.00
  -5 -11   4   -0.30    3.40
   0 -12  -4  187.88   10.00
   0  12  -4  160.78   13.90
   0  12   4  144.49   10.20
   0  12   4  181.18   15.20
   0 -12   4  174.08   12.20
  -2 -12  -4  147.89    9.60
   2  12  -4  150.18   13.00
  -2  12   4  166.38   15.00
   2 -12   4  119.79   10.30
  -2 -12  -4  167.78    9.90
   2  12   4  162.48   14.10
  -2 -12   4  144.79   10.00
   2  12   4  123.89    9.50
   2 -12  -4  136.09    9.90
  -2  12  -4  124.79   12.60
   4 -12   4   17.80    5.40
   4  12  -4   17.00    4.80
   4  12  -4    9.90    6.70
  -4  12   4   15.30    9.20
   4  12   4   13.30    4.70
  -4  12  -4    5.30    6.60
   4  12   4    6.60    7.60
   4 -12  -4   23.10    5.50
   1 -13   4   19.40    5.90
  -1  13   4   11.30    8.70
   1  13  -4   10.60    7.40
  -1 -13  -4    5.50    4.50
   1 -13  -4    6.00    4.30
  -1  13  -4   11.70    7.60
   1  13   4   -0.30    7.00
   0   0   5   -1.80    1.10
   0   0  -5   -1.30    1.20
   0   0   5   -0.80    1.00
   0   0   5    2.30    2.80
   0   0  -5    1.00    1.10
   0   0  -5   -1.00    2.70
   2   0   5   -0.70    2.40
  -2   0   5   -0.10    1.20
   2   0  -5    0.20    2.40
   2   0   5    1.90    1.40
  -2   0  -5    0.00    2.50
   2   0  -5   -0.80    1.10
   2   0  -5    0.10    1.30
   4   0   5   -1.90    2.60
   4   0  -5    0.70    1.60
   4   0   5    0.60    1.20
   6   0  -5   -0.60    1.80
   8   0  -5   -1.50    2.20
   1   1  -5  436.46   15.70
  -1   1   5  418.06   15.60
   1  -1   5  439.66   15.70
   1  -1   5  447.26   16.10
  -1  -1  -5  404.26   17.60
  -1   1   5  425.36   17.60
   1   1  -5  426.56   15.80
  -1  -1  -5  430.56   15.70
   1   1  -5  421.86   17.40
  -1   1  -5  428.46   15.70
   1  -1  -5  406.26   15.50
   1   1   5  432.86   15.70
   1  -1  -5  422.56   15.70
  -1  -1   5  450.35   15.70
  -1   1  -5  444.16   18.00
  -1  -1   5  424.56   15.80
   1   1   5  428.16   17.80
   1  -1  -5  418.06   17.90
   3   1  -5  188.78    8.60
   3  -1   5  195.58    8.40
  -3   1   5  192.48    7.90
   3   1  -5  185.98    7.90
   3   1  -5  191.68    9.50
   3  -1   5  181.88    8.20
  -3   1  -5  182.28    9.60
   3  -1  -5  177.08   10.00
   3   1   5  189.38    8.00
   3  -1  -5  194.78    8.00
  -3   1  -5  198.58    8.40
   3   1   5  186.38   10.00
   3  -1  -5  185.58    8.60
   5  -1   5  143.89    7.70
   5   1  -5  154.78    8.20
   5  -1  -5  147.09    8.20
   7  -1   5   64.69    5.90
   7   1  -5   44.80    6.30
   7  -1  -5   50.09    5.60
   0  -2  -5 4670.13  162.28
   0   2  -5 5001.00  162.18
   0   2   5 4917.61  162.58
  -2   2   5  746.63   29.50
   2   2  -5  792.12   28.70
  -2  -2  -5  795.42   29.00
  -2   2   5  767.12   27.60
  -2  -2  -5  830.42   27.60
   2   2   5  829.12   30.10
  -2  -2   5  762.62   27.40
   2  -2  -5  784.82   30.30
  -2  -2   5  762.62   27.90
   2   2   5  825.12   27.60
   2  -2  -5  789.12   28.70
  -2   2  -5  789.62   29.90
   4  -2   5 2001.00   68.69
   4   2  -5 2028.30   68.79
   4  -2  -5 2030.50   67.89
   4  -2  -5 2007.30   70.89
   6  -2   5  129.89    8.00
   6   2  -5  116.39    7.40
   8  -2   5  574.54   24.20
   8   2  -5  542.85   23.30
  -1  -3  -5   12.40    2.20
  -1   3   5   10.80    2.30
  -1   3   5   15.00    4.40
   1   3  -5   10.50    2.30
  -1  -3  -5   11.50    3.70
  -1   3  -5   16.30    3.00
  -1  -3   5   15.90    2.50
  -1  -3   5    8.20    2.20
   1  -3  -5    7.40    3.60
   1   3   5   11.50    2.10
   1   3   5   15.00    4.20
   1  -3  -5   13.80    2.50
  -3  -3  -5   38.40    3.10
  -3   3   5   40.20    3.40
  -3   3   5   48.30    6.10
   3  -3   5   39.10    3.70
   3   3  -5   43.70    3.80
   3   3   5   38.60    5.70
  -3   3  -5   45.00    5.80
   3  -3  -5   44.20    6.50
  -3  -3   5   42.20    3.80
  -3   3  -5   39.90    5.60
   3  -3  -5   36.40    3.50
   3   3   5   31.70    3.00
   5  -3   5    1.80    2.20
   5   3  -5    3.30    2.00
  -5   3   5    0.20    1.60
   5  -3   5   -1.50    1.60
   5  -3  -5   -2.20    1.40
   5  -3  -5    5.60    3.70
   7  -3   5    5.00    3.20
   7   3  -5    5.10    2.70
   0  -4   5    2.50    1.60
   0   4   5    2.40    1.60
   0   4   5    3.90    3.20
   0   4  -5    3.40    1.80
   0   4  -5    2.30    2.20
   0  -4  -5    0.80    2.50
   0  -4  -5    1.80    1.50
   2   4  -5  132.39    7.10
  -2   4   5  152.48    9.80
  -2  -4  -5  131.89    6.50
  -2   4   5  138.99    6.90
   2  -4   5  136.19    7.20
  -2  -4  -5  139.09    7.80
  -2   4  -5  140.09    7.90
  -2  -4   5  136.89    6.70
   2   4   5  127.79    6.50
  -2   4  -5  134.89    7.60
   2  -4  -5  147.99    9.40
   2   4   5  121.29    9.30
   2  -4  -5  147.99    7.10
  -2  -4   5  135.59    7.00
   4  -4   5    2.60    2.20
  -4   4   5    2.10    1.80
  -4   4   5    1.70    3.10
   4  -4   5    2.70    2.20
   4   4  -5    3.50    2.10
   4   4   5    5.90    3.80
   4  -4  -5    2.20    1.90
  -4  -4   5    5.00    2.30
  -4   4  -5   -1.60    2.80
   4  -4  -5    3.80    3.30
  -4   4  -5    3.20    2.70
   6   4  -5   60.89    5.60
   6  -4   5   65.49    6.20
   6  -4   5   59.89    5.30
   6  -4  -5   73.59    7.50
   6  -4  -5   57.79    5.00
   8   4  -5    2.90    2.90
  -1   5   5   14.00    4.50
   1  -5   5    6.00    2.30
   1   5  -5   11.40    2.70
  -1   5   5   11.50    2.50
  -1  -5  -5    7.90    2.20
  -1  -5  -5    6.20    3.20
   1  -5   5    6.80    2.50
   1   5  -5    8.00    2.80
   1  -5  -5    6.50    2.30
  -1   5  -5   10.20    3.20
   1  -5  -5    9.40    4.30
  -1   5  -5    9.10    2.80
  -1  -5   5   10.20    2.50
  -1  -5   5    9.40    2.40
   1   5   5    8.80    4.20
   1   5   5    6.50    2.00
   3   5  -5   16.80    3.20
   3  -5   5   13.20    3.20
  -3  -5  -5   14.80    2.50
   3  -5   5   18.30    3.60
  -3   5   5   17.70    5.10
  -3   5   5   18.10    3.10
  -3  -5   5   12.30    2.90
   3   5   5   13.20    2.40
   3  -5  -5   16.20    4.70
  -3   5  -5   20.80    4.30
  -3  -5   5   17.60    3.00
   3   5   5   11.00    4.20
   3  -5  -5   16.40    3.20
   5  -5   5   20.90    3.90
  -5   5   5   32.70    4.50
   5   5  -5   24.20    4.10
   5  -5   5   23.60    4.30
   5  -5  -5   33.90    4.40
   5  -5  -5   32.70    6.00
   7   5  -5    3.80    2.80
   7  -5   5   -0.70    2.20
   7  -5  -5   -0.70    2.00
   7  -5  -5    1.80    4.30
   0   6  -5 2871.21   94.49
   0  -6   5 2733.23   94.09
   0   6   5 2729.63   93.59
   0   6  -5 2782.22   94.79
   0  -6  -5 2904.81   97.79
   0   6   5 2716.83   97.19
   0  -6   5 2729.63   93.89
   0  -6  -5 2790.92   93.69
   2   6  -5  143.39    8.10
  -2  -6  -5  147.79    8.20
   2  -6   5  134.69    8.00
   2  -6   5  133.29    7.80
  -2  -6  -5  144.99    7.30
  -2   6   5  139.39   10.70
  -2   6   5  140.79    7.60
   2   6  -5  150.18    8.10
  -2  -6   5  144.79    7.40
   2  -6  -5  146.29    7.90
  -2   6  -5  148.99    9.10
   2  -6  -5  139.19    9.80
  -2  -6   5  133.09    7.50
   2   6   5  139.39   10.20
   2   6   5  131.89    7.20
  -4   6   5 1370.66   53.49
   4   6  -5 1482.65   50.79
   4  -6   5 1422.46   50.89
   4  -6   5 1475.85   51.59
  -4   6   5 1381.46   50.19
  -4  -6   5 1485.85   50.49
   4   6   5 1395.56   52.79
   4  -6  -5 1439.06   50.59
  -4   6  -5 1477.85   52.59
   4  -6  -5 1378.96   53.49
  -6   6   5   30.30    4.50
   6  -6   5   31.40    5.80
   6   6  -5   30.10    4.60
   6  -6   5   35.10    5.50
   6  -6  -5   19.50    5.80
   6  -6  -5   28.10    4.40
   1   7  -5   28.30    4.50
   1   7  -5   29.80    5.00
  -1  -7  -5   29.00    4.00
   1  -7   5   32.80    4.80
  -1  -7  -5   33.60    5.30
   1  -7   5   31.60    4.40
  -1   7  -5   31.50    5.60
  -1   7  -5   29.70    4.80
  -1  -7   5   28.50    4.20
   1   7   5   32.10    4.20
   1   7   5   39.30    7.20
  -1  -7   5   29.30    4.30
  -3   7   5  247.18   15.00
  -3  -7  -5  217.78   10.20
   3  -7   5  235.78   11.70
   3   7  -5  235.48   11.60
  -3   7   5  221.78   12.00
   3  -7   5  214.88   11.60
   3   7  -5  241.48   11.50
  -3   7  -5  228.08   13.10
   3  -7  -5  234.28   13.80
  -3  -7   5  219.38   10.90
  -3  -7   5  220.68   10.20
   3  -7  -5  236.48   11.40
   3   7   5  216.98   13.80
   3   7   5  217.48   10.40
  -5   7   5   11.20    3.00
   5  -7   5    4.00    3.10
  -5   7   5    3.50    5.00
   5   7  -5    4.90    2.60
   5  -7   5    4.70    3.20
   5  -7  -5    9.30    5.10
  -5  -7   5   13.20    3.50
   5   7   5    5.20    4.50
  -5   7  -5    2.40    4.20
   5  -7  -5    6.20    3.00
   7   7  -5   30.80    5.00
   7  -7   5   27.80    5.30
   7  -7  -5   35.00    5.50
   0   8  -5  172.98    9.70
   0  -8  -5  154.28   10.20
   0  -8   5  157.28    9.00
   0   8   5  141.29    8.40
   0   8   5  147.19   12.10
   0   8  -5  166.88   10.60
   0  -8  -5  132.89    8.30
   0  -8   5  151.48    8.70
   2   8  -5   29.70    5.40
  -2   8   5   23.10    4.30
   2  -8   5   27.00    4.90
  -2  -8  -5   27.30    4.20
   2   8  -5   27.00    4.70
  -2  -8  -5   25.10    4.70
  -2   8   5   32.60    7.50
   2   8   5   24.40    4.10
   2  -8  -5   32.40    5.00
  -2   8  -5   25.70    5.90
  -2  -8   5   26.30    4.20
   2   8   5   22.70    6.50
   4  -8   5  101.59   13.60
   4  -8   5  127.89    8.70
   4   8  -5  111.09    7.90
  -4   8   5  122.79   11.70
  -4  -8   5  115.59    7.70
   4  -8  -5   96.09   10.70
  -4   8  -5  119.19   10.70
   4   8   5  112.89    6.90
   4  -8  -5  131.69   10.40
   4   8   5  113.79   10.80
   6   8  -5   30.70    5.40
   6  -8   5   24.50    5.40
  -6   8  -5   21.20    6.10
   6  -8  -5   23.80    4.80
   1   9  -5  162.48   11.00
   1   9  -5  156.98   10.00
   1  -9   5  151.18    9.60
   1  -9   5  145.59    9.20
  -1   9   5  146.89    9.10
  -1   9   5  160.98   13.30
  -1  -9   5  173.88    9.60
   1  -9  -5  179.08   11.20
  -1  -9   5  154.58    9.30
   1  -9  -5  162.88    9.40
   1   9   5  165.28    9.10
   1  -9  -5  154.08    8.90
   1   9   5  164.48   13.20
  -1   9  -5  145.19   11.20
  -3  -9  -5   25.30    4.10
  -3   9   5   39.10    8.80
   3   9  -5   28.80    5.00
  -3   9  -5   23.10    6.90
   3   9   5   23.10    7.20
   3   9   5   27.10    4.40
   5  -9   5  113.79    8.90
  -5   9   5  169.28   25.80
   5   9  -5  114.79    8.40
   5  -9  -5  110.89    8.50
  -5   9  -5  120.99   11.30
   0 -10  -5  762.92   28.90
   0  10   5  756.12   30.10
   0 -10   5  782.32   30.70
   0 -10  -5  790.92   30.20
   2 -10   5  130.59    8.70
  -2  10   5  135.29    8.50
  -2 -10  -5  121.69    8.20
   2  10  -5  117.19    9.00
   2 -10   5   93.99   10.90
  -2 -10  -5  139.19    8.50
   2  10  -5  120.29   10.10
  -2  10   5  118.19   13.10
   2 -10  -5  135.89    8.70
   2  10   5  127.99    8.00
   2 -10  -5  118.79   10.00
   2  10   5  121.39   12.20
  -2 -10   5  114.39    8.40
  -2  10  -5  120.99   11.10
   4  10  -5  490.35   23.00
   4 -10   5  493.65   22.60
   4  10  -5  487.95   22.40
  -4  10   5  534.85   27.30
   4 -10  -5  507.95   22.50
   4  10   5  478.45   28.70
  -4 -10   5  527.05   23.00
   4  10   5  524.05   21.00
  -4  10  -5  522.35   25.90
  -1  11   5    0.40    3.20
  -1  11   5    1.10    6.50
  -1 -11  -5    2.90    3.50
   1  11  -5    9.10    3.70
  -1  11  -5    5.40    5.10
   1 -11  -5    6.10    4.50
  -1 -11   5    8.90    3.30
   1  11   5    3.10    3.50
   1  11   5   -0.60    6.10
   1 -11  -5    9.30    3.10
   3  11  -5   94.09    8.30
  -3  11   5  101.19   14.50
   3 -11   5   78.09    8.10
  -3 -11  -5   92.79    7.20
   3  11  -5   83.19   10.50
   3  11   5   97.09    7.50
  -3  11  -5  107.49   14.20
   3 -11  -5   91.09    8.10
  -3 -11   5  112.19    7.80
   3  11   5   93.19   12.60
   5 -11   5   30.30    8.00
   5  11  -5    8.30    5.70
   5 -11  -5   12.00    6.00
   5  11   5    6.00    3.90
   0 -12  -5    3.10    3.70
   0  12   5    5.20    7.40
   0  12  -5    0.60    5.20
  -2 -12  -5  245.68   13.30
   2  12  -5  228.68   14.00
  -2 -12  -5  255.57   19.30
  -2  12   5  257.17   19.20
   2  12  -5  224.08   15.90
   2 -12   5  228.68   14.10
  -2 -12   5  246.08   13.40
   2  12   5  268.07   18.70
   2  12   5  237.08   16.20
   2 -12  -5  217.28   13.40
  -2  12  -5  238.18   17.50
  -1  13   5   18.30    9.40
   1  13  -5    9.80    7.70
  -1 -13  -5   15.20    4.60
   1 -13   5   11.50    5.40
   1  13   5   10.80    8.90
  -1 -13   5   19.10    5.70
   1 -13  -5   15.10    4.80
  -1  13  -5   20.00    9.10
   0   0  -6 4490.35  151.48
   0   0   6 4539.55  151.08
  -2   0  -6 2111.69   73.99
  -2   0  -6 2232.88   76.79
   2   0  -6 2202.78   76.79
   2   0   6 2262.87   74.59
   2   0   6 2290.97   76.89
  -2   0   6 2182.18   74.19
   2   0  -6 2209.68   74.79
   2   0  -6 2287.07   75.69
   4   0  -6   50.19    5.60
   4   0   6   56.09    6.00
   4   0   6   50.49    3.80
   4   0  -6   53.19    4.50
   6   0  -6   24.00    4.20
   8   0  -6   54.99    6.20
  -1   1   6  188.98    8.20
   1  -1   6  178.98    8.10
   1   1  -6  194.28    8.40
  -1   1   6  204.68   10.50
  -1  -1  -6  178.08   10.40
  -1  -1  -6  181.48    8.30
   1   1  -6  196.08    8.40
   1  -1   6  194.68    8.60
   1   1  -6  207.78   10.70
  -1  -1   6  196.78    8.40
   1  -1  -6  190.28   10.80
  -1   1  -6  205.08    8.40
   1   1   6  194.98   10.60
   1  -1  -6  199.68    8.20
  -1   1  -6  189.78   10.60
  -1  -1   6  190.08    8.30
   1  -1  -6  188.68    8.30
   1   1   6  182.98    8.30
   3  -1   6   36.50    3.20
  -3   1   6   33.80    3.00
   3   1  -6   48.20    5.80
   3   1  -6   35.80    3.20
   3  -1   6   37.00    3.60
   3   1  -6   30.20    3.40
   3  -1  -6   34.30    3.20
   3  -1  -6   44.20    6.30
  -3  -1   6   37.60    2.90
  -3   1  -6   40.30    3.70
   3   1   6   33.40    3.10
   3   1   6   48.60    6.20
  -3   1  -6   41.10    5.70
   3  -1  -6   38.70    3.70
   5   1  -6   86.69    6.20
   5  -1   6   88.09    5.50
   5  -1  -6   87.79    6.30
   7   1  -6    3.30    2.60
   7  -1  -6    1.00    2.50
   0  -2   6  105.59    5.50
   0  -2  -6   98.49    7.60
   0  -2  -6   96.29    5.30
   0   2  -6  102.69    5.50
   0  -2   6   97.89    5.60
   0   2   6   89.19    7.50
   0   2   6   96.59    5.20
   0   2  -6  101.69    7.60
   0  -2  -6  100.89    4.80
  -2  -2  -6  617.14   21.70
  -2  -2  -6  571.04   23.50
  -2   2   6  570.94   23.80
   2  -2   6  601.64   22.30
   2   2  -6  622.24   23.80
   2   2  -6  615.24   22.20
   2  -2   6  606.94   22.00
  -2   2   6  593.34   21.70
  -2  -2   6  586.14   22.00
   2  -2  -6  592.64   21.80
   2  -2  -6  612.04   24.80
   2  -2  -6  592.14   21.90
   2   2   6  573.54   24.20
  -2   2  -6  598.34   22.20
   2   2   6  618.04   21.70
  -2  -2   6  611.74   21.60
  -2   2  -6  607.14   24.40
   4   2  -6   53.39    4.50
   4  -2   6   38.50    4.00
  -4   2   6   48.40    3.70
   4  -2   6   46.50    4.30
   4  -2  -6   49.50    3.90
   4  -2  -6   48.80    4.50
   4  -2  -6   55.89    7.60
   4   2   6   44.60    3.50
   6   2  -6  153.08    9.00
   6  -2   6  163.58    9.00
   6  -2   6  158.58    8.40
   6  -2  -6  150.48    9.30
   8   2  -6   20.50    4.40
   8  -2   6   18.20    4.70
   8  -2  -6   12.80    4.50
  -1  -3  -6   -0.60    1.30
   1  -3   6    1.30    1.90
  -1   3   6   -1.60    2.80
   1  -3   6   -0.40    1.20
  -1   3   6   -0.10    1.20
  -1  -3  -6    0.40    2.60
   1   3  -6   -3.80    1.30
  -1  -3   6    0.80    1.40
   1   3   6   -0.60    3.40
   1   3   6    0.80    1.40
  -1   3  -6   -2.30    1.30
  -1   3  -6   -1.60    2.80
   1  -3  -6   -1.50    1.40
  -1  -3   6   -0.30    1.30
   1  -3  -6    1.40    3.10
  -3  -3  -6  206.98    8.90
   3   3  -6  223.48    9.90
  -3   3   6  207.88   11.40
  -3   3   6  207.08    9.20
   3  -3   6  202.88    9.60
  -3   3  -6  196.38   10.00
   3   3   6  192.48    8.80
   3  -3  -6  204.88   13.30
   3  -3  -6  217.98    9.40
  -3   3  -6  195.28   11.30
  -3  -3   6  207.38    9.60
   5  -3   6    9.50    3.20
   5   3  -6    3.90    2.40
   5  -3   6    4.60    2.60
   5  -3   6   11.40    3.20
   5  -3  -6    7.40    2.60
   5  -3  -6    2.20    3.60
   7  -3   6   17.90    4.10
   7   3  -6   17.70    4.10
   7  -3  -6   12.50    3.80
   0   4   6 2363.86   83.79
   0   4  -6 2430.66   80.99
   0  -4  -6 2446.46   83.49
   0  -4   6 2349.36   80.79
   0   4   6 2371.36   80.49
  -2   4   6 9364.26  315.67
  -2  -4  -6 9469.05  313.67
   2  -4  -6 9538.65  317.37
   2   4   6 9645.63  315.37
  -2   4  -6 9533.65  313.27
   4  -4   6  157.48    8.60
  -4   4   6  147.29    7.70
   4   4  -6  151.38    8.40
   4  -4   6  152.68    8.50
   4   4   6  148.69   10.10
  -4   4  -6  156.18    9.10
   4  -4  -6  151.08   10.60
  -4   4  -6  150.58   10.00
   4  -4  -6  160.98    8.10
   4   4   6  151.08    7.20
  -4  -4   6  136.99    8.10
   6   4  -6 1472.15   52.89
   6  -4   6 1562.94   53.69
   6  -4   6 1466.25   52.39
   6  -4  -6 1439.66   55.39
   6  -4  -6 1474.25   51.89
   8   4  -6    3.70    3.00
   8  -4  -6    1.50    3.30
  -1   5   6    7.30    4.50
   1  -5   6    9.80    2.60
   1   5  -6   11.10    2.90
  -1   5   6    9.10    2.80
  -1  -5  -6    9.70    2.60
  -1  -5  -6    9.00    3.60
   1  -5   6   11.10    3.10
  -1   5  -6    9.90    3.40
   1  -5  -6   11.00    2.60
   1  -5  -6    6.10    3.90
   1   5   6   13.20    4.90
  -1   5  -6   10.60    2.80
  -1  -5   6    8.40    2.30
   1   5   6    9.70    2.50
  -3   5   6  201.38   12.40
   3   5  -6  183.88    9.40
   3  -5   6  193.18    9.70
   3  -5   6  183.08    9.70
  -3   5   6  170.08    8.90
  -3  -5  -6  203.28    8.70
  -3  -5   6  180.08    9.20
   3   5   6  186.68   11.80
   3   5   6  187.08    8.70
   3  -5  -6  181.88   11.90
  -3   5  -6  184.28   10.30
   3  -5  -6  186.98    9.30
  -3  -5   6  171.28    8.40
  -5   5   6    2.20    2.30
   5   5  -6   -0.70    2.00
   5  -5   6   -0.10    2.10
   5  -5   6   -1.00    2.50
  -5   5  -6   -2.00    3.70
   5  -5  -6    1.50    2.20
   5   5   6    3.40    4.00
   5  -5  -6    4.80    4.50
   7  -5   6   28.10    4.90
   7   5  -6   21.30    4.50
   7  -5  -6   21.20    5.90
   7  -5  -6   20.20    3.90
   0  -6  -6  291.97   15.00
   0  -6   6  300.47   13.10
   0   6  -6  297.97   13.80
   0   6  -6  278.67   13.20
   0  -6   6  289.47   13.20
   0   6   6  286.07   16.10
   0  -6  -6  298.57   12.80
  -2  -6  -6  509.95   21.10
   2   6  -6  528.25   20.80
   2  -6   6  520.15   21.00
  -2   6   6  503.05   20.20
  -2  -6  -6  518.95   19.80
   2   6  -6  540.15   20.90
  -2   6   6  531.15   24.30
   2  -6   6  508.85   20.70
  -2  -6   6  515.95   20.30
  -2   6  -6  486.25   21.00
   2   6   6  518.35   19.90
   2  -6  -6  514.15   20.40
   2  -6  -6  494.55   23.10
  -2   6  -6  520.05   21.80
  -2  -6   6  523.55   20.20
   2   6   6  520.15   23.60
   4  -6   6  341.27   14.90
   4  -6   6  306.47   14.80
   4   6  -6  312.97   14.40
  -4   6   6  311.37   17.30
  -4   6   6  306.37   14.00
   4   6   6  306.87   13.20
  -4  -6   6  309.97   14.20
   4  -6  -6  339.77   14.50
   4  -6  -6  320.37   17.30
   4   6   6  315.07   16.80
  -4   6  -6  327.87   16.10
   6   6  -6  284.47   14.60
   6  -6   6  309.37   14.80
   6  -6   6  332.37   17.40
   6  -6  -6  327.37   17.70
   6  -6  -6  316.27   14.60
  -1  -7  -6   35.90    4.20
   1  -7   6   28.90    4.40
  -1   7   6   36.80    4.80
  -1   7   6   33.80    7.20
   1   7  -6   48.00    6.40
  -1  -7  -6   35.60    5.80
   1  -7   6   38.60    5.40
   1   7  -6   43.30    5.60
  -1  -7   6   37.80    5.00
   1  -7  -6   37.00    4.80
  -1   7  -6   24.30    4.70
  -1   7  -6   31.70    5.70
  -1  -7   6   31.70    4.50
   1  -7  -6   41.60    6.90
   1   7   6   34.90    7.40
   3   7  -6   25.10    4.50
  -3  -7  -6   17.40    3.30
   3  -7   6   16.70    4.00
  -3   7   6   15.80    6.10
   3   7  -6   30.70    5.20
   3  -7   6   23.90    4.60
  -3  -7   6   21.90    4.00
   3   7   6   23.80    6.60
   3  -7  -6   37.30    6.70
  -3  -7   6   25.80    3.80
  -3   7  -6   18.60    5.30
  -3  -7   6   26.80    4.00
   3  -7  -6   19.90    3.80
   3   7   6   20.80    3.60
   5  -7   6   32.10    5.90
  -5   7   6   53.39    8.90
   5   7  -6   31.20    5.00
   5  -7   6   38.00    5.90
  -5   7   6   37.40    6.00
   5  -7  -6   33.90    7.30
  -5   7  -6   46.40    8.10
   5  -7  -6   37.60    5.40
  -5  -7   6   20.20    7.30
   5   7   6   31.60    7.10
  -5   7  -6   50.09    8.00
   7  -7  -6   30.00    5.00
   0  -8  -6  314.47   14.20
   0   8   6  312.27   14.20
   0   8   6  308.37   18.40
   0   8  -6  335.57   16.30
   0  -8   6  308.37   14.60
   0   8  -6  314.27   15.20
   0  -8   6  307.77   14.40
   0  -8  -6  319.97   16.20
   2  -8   6  663.43   26.50
  -2  -8  -6  620.44   26.10
  -2  -8  -6  668.13   25.40
   2   8  -6  706.33   26.80
  -2   8   6  675.83   30.80
   2   8  -6  683.43   27.10
  -2   8   6  653.03   26.00
   2   8   6  666.63   30.10
  -2  -8   6  643.24   25.40
  -2  -8   6  663.63   25.90
   2  -8  -6  660.13   26.10
   2   8   6  633.44   26.90
  -2   8  -6  680.53   28.30
   4   8  -6    1.20    3.00
  -4   8   6    2.40    5.90
   4  -8   6    1.30    3.10
   4   8  -6    0.90    2.60
  -4  -8  -6    3.50    2.20
   4  -8   6    1.20    2.70
  -4   8  -6    7.80    4.50
   4  -8  -6    2.70    4.30
   4   8   6    0.90    2.30
   4   8   6   -2.10    4.50
   4  -8  -6    3.60    2.80
  -4  -8   6    6.30    3.00
   6  -8   6   29.00    5.60
   6   8  -6   26.30    5.00
   6  -8  -6   26.30    4.90
   1   9  -6   51.09    6.70
  -1   9   6   51.79   10.10
   1   9  -6   53.99    7.60
   1  -9   6   61.09    7.30
  -1   9   6   45.20    6.00
  -1  -9  -6   44.70    6.50
  -1  -9  -6   46.60    5.50
   1   9   6   52.79    5.40
   1   9   6   59.99   10.50
  -1  -9   6   58.39    6.00
  -1   9  -6   47.50    7.90
   1  -9  -6   53.29    5.80
  -1  -9   6   67.79    6.10
   3   9  -6    0.20    2.80
   3  -9   6    3.30    2.90
   3   9  -6    1.70    3.40
  -3   9   6    0.30    2.40
   3  -9   6    0.20    2.80
  -3  -9  -6    5.30    2.80
  -3  -9   6    5.50    4.20
   3   9   6    6.90    5.80
   3   9   6    0.60    2.30
   3  -9  -6    2.90    3.00
  -3   9  -6    0.40    4.10
   5   9  -6   41.50    6.30
   5  -9   6   50.79    7.10
  -5   9   6   47.70    9.10
   5   9  -6   59.09    6.60
  -5   9  -6   61.29    9.60
   5  -9  -6   44.70    6.30
  -5  -9   6   49.90    6.80
   5   9   6   63.89    9.50
   0 -10   6    0.20    2.40
   0 -10   6   -0.50    3.10
   0  10   6    3.40    6.00
   0  10  -6    4.30    4.40
   0  10   6    3.50    3.40
   0 -10  -6    5.30    3.50
  -2 -10  -6   40.30    5.70
  -2  10   6   43.40    6.40
   2 -10   6   38.00    6.40
  -2 -10  -6   41.40    5.50
  -2  10   6   46.60    9.30
   2  10  -6   36.70    9.90
   2 -10  -6   44.60    6.50
   2  10   6   56.69    5.50
  -2  10  -6   35.90    7.90
  -2 -10   6   55.19    7.10
  -2 -10   6   44.70    6.20
   2  10   6   35.60    9.80
   4  10  -6   10.30    4.30
  -4  10   6    4.50    6.90
   4 -10   6    8.80    4.30
  -4  10  -6   21.40    6.80
   4 -10  -6    8.70    4.30
   4  10   6   15.10    3.90
  -4 -10   6    6.80    3.40
   4  10   6    7.60    6.90
   1 -11   6    3.30    3.80
   1  11  -6    5.20    5.30
  -1  11   6    0.40    6.30
  -1 -11  -6   -1.30    2.80
   1  11  -6   -0.90    3.10
   1  11   6    3.30    6.90
  -1  11  -6   -2.90    3.90
   1 -11  -6    1.10    3.00
  -1 -11   6   -0.50    3.20
   1  11   6    1.80    6.20
   1 -11  -6    6.00    3.30
  -3  11   6   16.00    8.60
  -3 -11  -6   22.00    4.70
   3  11  -6   14.60    6.10
   3 -11   6   22.40    5.60
   3  11  -6   14.60    4.80
  -3  11  -6   15.00    7.70
   3 -11  -6   19.70    4.90
   3  11   6   11.60    7.30
  -3 -11   6   20.60    5.00
   3  11   6   32.30    5.40
   0 -12   6  233.58   14.10
   0 -12  -6  213.48   12.70
   0  12   6  246.78   18.70
   0  12  -6  207.48   15.60
   2  12  -6 1462.75   58.99
   2 -12   6 1516.65   56.89
  -2  12   6 1506.15   63.19
   2  12  -6 1472.45   56.69
   2  12   6 1492.25   62.59
   2  12   6 1529.65   55.89
  -2  12  -6 1459.45   60.49
   2 -12  -6 1488.85   55.99
  -2 -12   6 1588.64   55.59
   0   0   7    1.10    1.50
   0   0  -7    3.30    1.80
   0   0   7    1.00    1.30
   0   0  -7    2.70    1.60
   0   0  -7   -0.10    3.10
  -2   0  -7   -4.20    2.30
   2   0  -7    1.60    1.60
  -2   0  -7    0.80    1.80
  -2   0   7   -0.20    1.20
   2   0  -7   -1.30    2.70
   2   0  -7   -1.60    1.20
   2   0   7    1.60    1.60
   2   0   7   -0.70    2.90
   4   0  -7    3.10    2.10
   4   0  -7    5.70    3.40
   4   0   7   -0.70    3.00
   4   0  -7    4.10    1.80
   6   0  -7   -2.20    1.90
   8   0  -7    1.90    2.30
   1   1  -7    2.00    1.50
  -1  -1  -7   -3.80    2.40
  -1  -1  -7    0.60    1.20
  -1  -1  -7    0.70    1.40
  -1   1   7   -0.50    1.40
   1  -1   7   -0.40    1.30
   1  -1   7    0.90    1.60
  -1   1   7   -2.20    2.90
   1  -1  -7    0.40    1.40
   1  -1  -7    2.50    3.00
   1   1   7    0.30    2.90
   1  -1  -7    1.90    1.40
  -1   1  -7   -1.10    1.20
   1   1   7    0.90    1.50
  -1   1  -7    1.90    3.30
  -3   1   7   27.70    3.10
  -3   1   7   33.80    4.80
   3  -1   7   30.00    3.50
   3   1  -7   29.90    3.90
   3  -1   7   28.20    3.90
  -3  -1  -7   35.00    4.20
   3   1  -7   26.70    5.00
   3   1   7   36.50    6.20
   3  -1  -7   33.20    5.80
  -3  -1   7   26.80    3.60
  -3   1  -7   39.80    4.50
   3   1   7   26.60    3.10
   3  -1  -7   27.40    3.20
   3  -1  -7   24.30    3.70
  -3   1  -7   29.40    5.40
   5   1  -7    4.30    2.50
   5  -1   7    6.40    2.40
   5  -1  -7    2.60    2.30
   5   1   7    6.20    4.20
   7   1  -7   -0.50    2.40
   7  -1  -7   -1.10    2.20
   0  -2  -7 2586.54   86.89
   0  -2   7 2601.64   87.79
   0   2  -7 2704.03   88.09
   0   2  -7 2635.54   90.69
   0  -2   7 2632.64   88.09
   0   2   7 2624.74   90.79
   0   2   7 2633.14   87.69
   0  -2  -7 2527.15   90.89
  -2   2   7  312.87   14.60
  -2  -2  -7  289.97   14.30
  -2   2   7  320.57   12.90
   2   2  -7  313.97   14.60
   2  -2   7  285.07   12.60
  -2  -2  -7  291.07   12.20
   2   2  -7  299.97   12.60
   2  -2   7  298.37   12.20
  -2   2  -7  316.67   13.70
  -2  -2   7  318.27   13.70
   2  -2  -7  286.57   12.20
  -2  -2   7  290.37   12.00
  -2   2  -7  306.57   15.10
   2   2   7  288.37   12.10
   2   2   7  263.27   14.50
   2  -2  -7  292.57   15.30
   2  -2  -7  299.87   12.30
   4  -2   7 1748.82   61.79
  -4   2   7 1758.02   61.19
   4   2  -7 1870.71   62.59
   4  -2   7 1805.52   62.09
   4   2  -7 1816.72   63.79
   4  -2  -7 1781.92   65.19
   4  -2  -7 1835.02   62.49
   4   2   7 1804.42   64.39
   4   2   7 1752.82   61.09
   4  -2  -7 1837.12   61.49
   6  -2   7  148.99    8.50
   6  -2   7  130.29    8.00
   6   2  -7  159.78    9.10
   6  -2   7  131.39    7.80
   8  -2   7  655.43   25.60
   8   2  -7  580.44   25.60
   8  -2  -7  603.74   26.10
   1   3  -7  200.08    9.30
  -1  -3  -7  203.88    9.00
  -1   3   7  174.78    8.70
  -1  -3  -7  190.08   11.30
   1  -3   7  204.08    9.20
   1   3  -7  191.18   11.10
   1  -3   7  202.68    9.50
  -1   3   7  184.48   11.60
   1  -3  -7  191.98    8.70
   1  -3  -7  192.28   11.80
   1   3   7  198.28    9.00
  -1  -3   7  195.68    9.20
   1  -3  -7  187.68    9.00
  -1   3  -7  202.98   11.70
  -1   3  -7  217.48    9.60
  -1  -3   7  192.58    9.10
   1   3   7  212.48   12.10
  -3   3   7  112.19    6.30
  -3   3   7  110.99    8.50
   3   3  -7  129.09    8.50
   3   3  -7  112.19    6.80
  -3  -3  -7  121.99    6.30
   3  -3   7  117.89    7.10
   3  -3  -7  118.59    6.80
  -3  -3   7  105.69    6.60
   3   3   7  110.39    8.90
  -3   3  -7  106.09    8.60
  -3  -3   7  110.39    5.90
  -3   3  -7  115.49    7.20
   3  -3  -7  116.99    6.50
   3  -3  -7  118.89    9.30
   3   3   7  109.59    6.10
   5  -3   7   76.89    6.00
   5  -3   7   71.79    5.70
  -5   3   7   76.19    5.20
   5   3  -7   79.89    6.20
   5   3   7   80.79    8.00
   5  -3  -7   87.29    6.50
   5  -3  -7   79.39    8.30
   5  -3  -7   84.99    5.60
   7   3  -7   48.70    6.60
   7  -3   7   63.39    8.00
   7  -3   7   47.10    5.00
   7  -3   7   48.40    6.00
   7  -3  -7   50.69    8.20
   7  -3  -7   55.59    7.30
   0  -4   7   27.50    6.30
   0  -4  -7   27.60    2.70
   0   4   7   32.80    6.50
   0   4  -7   30.90    4.10
   0  -4  -7   30.70    3.50
   0   4   7   30.30    3.80
   0  -4   7   27.80    4.20
   2  -4   7   32.70    4.30
   2   4  -7   20.50    3.60
  -2   4   7   21.90    3.50
  -2   4   7   27.30    6.10
  -2  -4  -7   26.50    3.80
  -2  -4  -7   34.50    5.60
   2  -4  -7   26.40    6.00
  -2   4  -7   33.60    5.00
  -2  -4   7   29.80    4.00
  -2  -4   7   28.00    3.80
   2   4   7   33.50    3.90
   2  -4  -7   28.20    4.00
  -2   4  -7   36.20    4.70
  -2   4  -7   34.40    6.30
   2   4   7   30.30    6.20
   4  -4   7   14.70    3.50
  -4   4   7    5.30    3.80
  -4  -4  -7   19.40    3.00
   4  -4   7    9.00    2.80
  -4   4  -7   12.30    3.70
   4   4   7   16.30    2.70
   4   4   7   20.20    5.20
  -4   4  -7    2.80    3.90
   4  -4  -7   13.90    4.80
   4  -4  -7   13.30    3.00
   6  -4   7   73.79    6.70
   6  -4   7   67.69    6.00
   6   4  -7   68.29    6.40
   6  -4   7   68.49    6.10
   6  -4  -7   62.79    8.90
   8   4  -7   22.70    4.80
   8  -4  -7   13.20    5.00
  -1   5   7  241.18   11.10
   1   5  -7  246.08   11.60
   1  -5   7  240.18   11.30
  -1   5   7  246.78   14.60
  -1  -5  -7  257.27   11.00
  -1  -5   7  226.28   11.00
   1  -5  -7  234.78   13.70
  -1  -5   7  224.38   11.00
  -1   5  -7  262.87   11.90
   1   5   7  245.18   14.40
   1  -5  -7  244.18   11.10
  -1   5  -7  251.37   12.10
   1   5   7  247.38   10.90
  -3   5   7   61.99    8.70
   3  -5   7   57.49    5.40
   3  -5   7   56.49    5.10
  -3  -5  -7   58.69    4.40
   3   5  -7   58.09    5.20
  -3   5   7   45.60    4.40
  -3  -5   7   51.49    4.60
  -3   5  -7   57.39    6.00
  -3  -5   7   46.00    4.30
  -3   5  -7   67.59    8.40
  -3  -5   7   47.40    4.90
   3  -5  -7   69.59    9.20
   3  -5  -7   57.69    4.90
   3   5   7   76.29    8.20
   5  -5   7  138.39    8.70
   5   5  -7  124.39    8.40
   5  -5   7  146.19    8.90
   5  -5  -7  144.69   11.20
   5   5   7  145.59   10.70
   5  -5  -7  128.19    7.90
   7  -5   7   47.50    6.20
   7  -5   7   48.80    6.60
   7   5  -7   42.80    6.30
   0  -6   7 1709.83   61.29
   0   6   7 1759.52   60.99
   0   6  -7 1793.62   61.79
   0   6   7 1774.82   65.49
   0  -6   7 1747.93   61.59
   0  -6  -7 1755.72   63.99
   0  -6  -7 1753.82   60.89
   0   6  -7 1801.82   62.19
  -2   6   7   77.19    5.70
  -2  -6  -7   73.79    5.30
  -2   6   7   86.89    9.40
   2  -6   7   70.59    6.10
   2   6  -7   78.79    6.20
   2  -6   7   63.29    5.70
  -2   6  -7   73.49    6.40
   2  -6  -7   73.49    9.50
   2   6   7   88.29   10.70
   2  -6  -7   75.79    5.80
  -2  -6   7   66.59    5.40
   2   6   7   69.69    5.30
  -2  -6   7   69.09    5.60
  -2   6  -7   69.19    6.70
  -2  -6   7   71.29    5.60
  -4  -6  -7 1334.77   46.00
   4   6  -7 1345.77   47.70
   4  -6   7 1309.67   48.00
   4  -6   7 1329.97   48.00
  -4   6   7 1328.87   50.79
   4   6   7 1305.87   50.49
   4  -6  -7 1252.67   50.89
  -4  -6   7 1370.66   47.50
  -4   6  -7 1260.47   49.90
   4   6   7 1311.47   46.20
  -4   6  -7 1294.17   48.90
   4  -6  -7 1353.76   47.40
   6  -6   7   70.99    6.60
   6   6  -7   71.89    6.60
   6  -6  -7   64.09    5.90
   1  -7   7   -2.00    1.90
  -1  -7  -7    1.20    2.20
   1   7  -7   -1.00    2.40
  -1   7   7    1.40    2.30
   1  -7   7    3.60    2.10
   1   7  -7    1.50    2.20
  -1  -7  -7    0.20    3.50
  -1   7   7   -8.60    3.50
   1  -7  -7    1.00    3.80
   1   7   7    2.10    4.60
   1  -7  -7    2.00    2.40
   1   7   7    0.70    2.10
  -1   7  -7    0.30    2.40
  -1   7  -7    1.60    2.90
   3   7  -7   -2.50    2.30
   3  -7   7    5.90    3.00
  -3   7   7    6.90    5.60
  -3  -7  -7    1.10    2.80
   3  -7   7    4.00    2.70
   3   7  -7    8.10    3.40
  -3  -7   7    3.60    2.70
   3  -7  -7    6.90    4.50
   3   7   7    6.30    5.50
  -3  -7   7    4.10    2.40
  -3   7  -7    6.90    3.70
   3   7   7    4.50    2.50
   3  -7  -7    4.30    2.70
  -3  -7   7    5.20    2.70
   5   7  -7   -0.10    3.00
   5  -7   7   -0.60    2.50
   5  -7  -7    0.20    2.70
  -5   7  -7   -5.80    3.10
  -5   7  -7   -2.20    4.70
   5   7   7    0.70    2.10
  -5  -7   7   -1.50    2.70
   5   7   7    0.80    4.70
   7   7  -7   -3.30    2.20
   7  -7   7    3.70    3.00
   7  -7  -7    9.20    3.10
   0   8   7    9.40    5.60
   0   8  -7    2.10    2.70
   0  -8   7    6.40    3.10
   0  -8  -7   12.90    3.50
   0   8   7   11.40    3.40
   0   8  -7    8.10    4.10
   0  -8  -7    8.10    4.60
   0  -8   7    6.40    3.20
   2  -8   7    9.50    3.80
  -2   8   7   10.10    6.10
  -2  -8  -7   15.40    3.60
  -2   8   7    8.50    3.40
   2   8  -7    5.40    4.00
   2   8  -7    7.50    3.60
  -2  -8  -7   23.10    4.60
  -2   8  -7   15.80    5.20
  -2  -8   7    8.70    3.40
   2  -8  -7   11.10    3.70
   2   8   7    7.60    3.00
   2   8   7    4.60    5.60
  -2  -8   7    6.10    3.20
   4   8  -7   84.89    7.50
  -4  -8  -7   89.59    6.30
  -4   8   7  111.49   13.80
   4   8  -7   93.89    7.70
   4  -8   7   84.99    7.50
  -4   8  -7   88.69   13.30
   4   8   7  104.69   12.90
  -4  -8   7  110.99    9.80
   4   8   7  110.49    6.70
   4  -8  -7   89.79    7.40
   6   8  -7   97.49    8.10
   6  -8   7  101.59    8.60
   6   8   7  129.19   11.40
   6  -8  -7  105.19    8.10
   1   9  -7    6.20    3.60
  -1   9   7    6.20    3.70
   1  -9   7    6.60    3.60
  -1  -9  -7    4.20    2.90
   1  -9   7   10.60    3.50
   1   9  -7    6.40    4.30
  -1  -9  -7    7.50    4.80
  -1   9  -7    7.00    6.40
   1   9   7    7.80    3.50
  -1  -9   7    6.50    3.30
   1  -9  -7    4.30    3.30
   1   9   7   14.30    6.80
   3  -9   7    7.60    3.70
  -3  -9  -7    5.30    3.00
   3   9  -7    7.70    4.10
  -3   9   7   -2.10    5.20
  -3  -9   7    0.30    2.80
  -3   9  -7    6.30    4.60
  -3  -9   7    4.80    3.00
   3   9   7    4.40    3.20
   3  -9  -7    2.20    3.10
   3   9   7    9.40    6.50
  -3  -9   7    4.90    2.80
  -5   9   7    7.10    6.70
   5  -9   7   14.30    4.60
   5   9  -7   23.90    4.60
   5  -9  -7    4.20    3.60
  -5   9  -7    1.00    5.50
   0 -10  -7  538.45   22.90
   0  10  -7  513.15   23.90
   0  10  -7  524.15   25.30
   0 -10   7  580.94   26.60
   0 -10   7  529.55   23.40
   0 -10  -7  566.64   25.30
   0  10   7  534.85   28.40
   2 -10   7   42.80    6.80
  -2  10   7   39.00    9.50
   2  10  -7   36.30    6.00
   2  10  -7   31.10    6.40
  -2 -10  -7   37.90    5.60
  -2 -10  -7   39.90    5.90
   2  10   7   53.59   10.30
  -2  10  -7   36.90    8.00
  -2 -10   7   23.10    5.70
   2 -10  -7   35.30    6.10
   2  10   7   47.00    5.50
  -2 -10   7   45.80    6.30
  -4 -10  -7  497.35   20.50
   4  10  -7  475.35   22.50
   4  10  -7  492.45   23.50
  -4  10   7  519.95   27.30
   4 -10   7  496.15   23.00
   4  10   7  531.75   26.90
   4  10   7  513.65   21.20
  -4  10  -7  519.55   25.60
   4 -10  -7  492.15   22.60
  -1 -11  -7   36.30    6.70
   1  11  -7   22.20    5.30
  -1  11   7    7.90    7.70
   1  11  -7   36.40    7.00
  -1 -11  -7   18.50    4.60
   1 -11   7   17.50    5.50
   1  11   7   19.30    4.80
   1  11   7    9.90    7.30
   1 -11  -7   20.90    4.50
  -1 -11   7   32.90    5.80
  -1  11  -7   35.80    8.00
   1 -11  -7   18.90    4.90
   3  11  -7   69.89    7.70
  -3 -11  -7   89.39    7.20
  -3  11   7   78.99   12.80
   3  11  -7   74.09    9.90
   3 -11   7   71.49    8.00
  -3  11  -7   92.69   10.50
   3  11   7   77.09   12.60
  -3 -11   7   94.29    7.40
   3  11   7  107.19    8.20
   3 -11  -7   69.29    7.70
   0 -12  -7   11.20    4.80
   0  12   7   12.70    8.60
   2  12  -7   73.09    8.10
  -2 -12  -7   51.59    7.00
  -2  12   7   68.69   12.10
  -2 -12  -7   87.49    9.80
   2  12  -7   71.29   10.20
   2  12   7   52.99   11.30
   2 -12  -7   53.59    7.80
   2  12   7   73.59    8.00
   0   0  -8 2667.43   92.89
   0   0   8 2669.43   89.39
   0   0   8 2646.24   88.89
   0   0  -8 2638.64   89.39
   0   0   8 2686.73   91.99
   0   0  -8 2643.64   89.99
   2   0   8 3719.03  122.69
  -2   0  -8 3623.34  121.79
  -2   0  -8 3696.33  125.89
   2   0  -8 3605.74  126.09
   2   0   8 3762.42  125.59
   2   0  -8 3725.03  122.39
   2   0  -8 3668.13  122.59
   2   0   8 3714.93  121.69
  -2   0   8 3498.45  122.09
  -2   0  -8 3728.23  122.69
   4   0  -8 1024.40   41.30
   4   0   8 1106.49   41.30
   4   0  -8 1104.09   37.90
  -4   0   8 1061.29   37.60
   4   0  -8 1104.19   39.10
   4   0   8 1051.29   38.10
   6   0  -8 1310.57   46.60
   6   0   8 1211.48   44.20
   8   0  -8  259.97   14.30
  -1  -1  -8   49.20    4.70
  -1  -1  -8   56.89    7.60
   1   1  -8   52.19    4.30
   1  -1   8   55.39    4.40
   1   1  -8   51.99    4.20
   1   1  -8   56.49    6.40
  -1   1   8   51.99    4.20
   1  -1   8   54.19    4.00
  -1   1   8   60.79    6.50
   1  -1  -8   52.29    7.70
   1  -1  -8   49.20    4.20
   1   1   8   54.29    4.30
   1  -1  -8   52.99    4.10
  -1  -1   8   53.49    4.10
   1   1   8   53.39    7.30
  -1   1  -8   63.79    8.10
  -1  -1   8   59.49    4.30
   3  -1   8  392.66   16.10
   3   1  -8  390.76   15.50
  -3  -1  -8  402.76   16.00
   3   1  -8  406.66   16.40
  -3   1   8  380.96   15.40
   3  -1   8  388.46   15.30
  -3  -1  -8  398.16   17.90
  -3   1   8  396.56   17.00
   3  -1  -8  387.96   19.00
   3  -1  -8  388.46   16.20
   3  -1  -8  418.96   15.80
  -3  -1   8  391.06   15.40
  -3   1  -8  404.26   18.70
  -3   1  -8  368.66   16.70
   3   1   8  394.86   15.70
   3   1   8  391.16   18.70
   5  -1   8   49.60    4.50
   5   1  -8   60.69    7.90
   5   1  -8   45.70    5.10
   5  -1  -8   44.60    4.90
   5  -1  -8   44.50    4.10
   5  -1  -8   45.30    7.60
   5   1   8   38.90    3.90
   5   1   8   48.80    7.50
   7   1  -8   18.60    4.50
   7  -1  -8   22.40    4.80
   0  -2  -8  484.15   22.30
   0  -2   8  493.15   19.00
   0  -2  -8  505.05   18.00
   0  -2  -8  484.25   18.70
   0   2  -8  475.25   24.90
   0   2   8  478.85   18.70
   0  -2   8  470.85   18.60
   0   2  -8  487.95   18.80
   0   2   8  509.15   22.00
  -2   2   8  381.36   17.60
  -2  -2  -8  381.46   15.10
   2   2  -8  374.96   20.80
   2  -2   8  368.86   15.00
  -2  -2  -8  374.36   17.70
   2   2  -8  379.26   15.50
  -2   2   8  363.06   15.00
   2  -2   8  396.06   15.70
  -2  -2   8  358.66   14.90
  -2   2  -8  374.16   15.20
   2  -2  -8  378.96   15.20
   2   2   8  375.96   18.20
  -2  -2   8  374.66   15.40
   2   2   8  380.46   15.10
   2  -2  -8  364.96   18.50
   2  -2  -8  380.96   15.10
   4   2  -8  258.67   14.10
   4  -2   8  260.77   11.90
   4   2  -8  254.67   12.10
   4  -2   8  240.28   11.50
  -4   2   8  245.88   11.10
   4   2   8  248.98   11.10
  -4   2  -8  245.18   13.70
   4  -2  -8  261.37   15.00
   4  -2  -8  265.97   12.20
   4   2   8  251.47   14.10
  -4   2  -8  262.47   11.90
   4  -2  -8  254.27   11.30
   6   2  -8  137.79   10.20
   6  -2   8  158.48    8.70
   6  -2   8  161.78    8.90
   6  -2  -8  191.58   12.20
   6  -2  -8  146.99    9.40
   8   2  -8   80.19    7.30
   8  -2  -8   85.39    7.60
   1   3  -8  109.99    8.70
  -1  -3  -8  100.49    8.60
  -1  -3  -8  105.59    6.30
  -1   3   8  109.79    6.30
  -1   3   8  123.49    9.30
   1   3  -8  104.99    6.50
  -1  -3   8  105.49    6.40
   1   3   8  109.79    9.10
  -1   3  -8  108.19    6.70
  -1   3  -8  104.49    9.00
   1   3   8  108.39    6.30
   1  -3  -8  109.99    9.10
   1  -3  -8  116.99    6.00
  -1  -3   8  109.19    6.50
   1  -3  -8  114.79    6.50
   3  -3   8 1114.49   40.40
  -3   3   8 1104.79   42.20
   3   3  -8 1138.79   40.40
  -3   3   8 1119.39   39.70
  -3  -3  -8 1161.78   39.60
   3   3  -8 1100.39   42.40
   3  -3   8 1120.29   39.90
  -3  -3  -8 1132.59   41.40
   3  -3  -8 1082.69   43.80
   3   3   8 1136.99   39.50
   3   3   8 1177.68   43.50
  -3  -3   8 1055.69   40.10
  -3   3  -8 1159.98   40.60
   3  -3  -8 1146.29   39.80
  -3  -3   8 1100.19   39.20
   3  -3  -8 1100.09   40.00
  -3   3  -8 1102.29   43.10
   5  -3   8    7.10    3.10
   5   3  -8    9.40    3.30
  -5   3   8   14.10    3.10
   5  -3   8    8.70    3.10
   5   3   8    9.60    2.60
   5   3   8    9.20    4.90
   5  -3  -8    4.70    4.80
   5  -3  -8   13.30    3.00
   5  -3  -8    2.80    2.80
   7  -3   8  130.49    8.30
   7  -3   8  128.19    8.00
   7  -3   8  116.09   13.30
   7   3  -8  126.79    9.00
   7  -3  -8  134.39    9.30
   7  -3  -8  148.99   12.00
   0   4   8   90.09    8.70
   0  -4   8   68.59    5.40
   0   4  -8   80.39    5.90
   0  -4  -8   87.39    5.60
   0  -4  -8   69.39    7.70
   0   4   8   86.49    6.10
   0  -4   8   67.29    5.30
   0   4  -8   80.99    7.70
   2   4  -8  763.62   28.50
   2   4  -8  736.43   30.50
   2  -4   8  739.53   28.70
  -2  -4  -8  711.73   30.00
  -2   4   8  812.12   28.30
   2  -4   8  749.42   28.30
  -2   4   8  809.82   32.00
   2   4   8  751.92   27.90
   2  -4  -8  809.42   28.00
   2   4   8  720.13   31.40
  -2  -4   8  734.93   27.90
   2  -4  -8  811.42   28.40
  -2   4  -8  750.62   28.90
  -2   4  -8  666.53   30.70
   2  -4  -8  842.82   32.60
  -2  -4   8  713.93   28.20
  -2   4  -8  780.22   28.90
   4  -4   8   10.20    3.40
  -4  -4  -8   12.70    3.10
  -4   4   8    2.10    3.80
  -4   4   8    4.20    2.40
   4   4  -8    3.50    4.00
   4   4  -8    7.10    2.90
   4  -4   8   10.30    3.00
  -4   4  -8   18.30    5.40
  -4  -4   8    4.00    2.90
  -4   4  -8    7.30    3.30
   4   4   8    7.50    4.80
   4  -4  -8    5.20    2.60
   4   4   8    4.40    2.40
   4  -4  -8    5.20    2.90
   4  -4  -8    7.40    4.70
  -6   4   8  211.08   10.10
   6  -4   8  203.18   11.10
   6  -4   8  191.08   11.80
   6  -4   8  230.08   13.10
   6   4  -8  199.88   11.30
   6  -4  -8  202.08   11.60
   6  -4  -8  214.88   18.10
   6  -4  -8  191.58   10.30
  -1  -5  -8   70.69    5.30
  -1   5   8   71.09    9.60
  -1   5   8   70.29    5.30
   1  -5   8   73.39    6.00
   1  -5   8   68.29    5.60
   1   5  -8   68.09    5.80
  -1  -5  -8   81.99    7.80
  -1  -5   8   69.29    5.40
   1   5   8   78.99    8.70
   1  -5  -8   69.99    4.90
  -1  -5   8   69.59    5.30
   1  -5  -8   76.89    5.60
  -1   5  -8   84.19    6.50
  -1   5  -8   67.39    5.80
   1  -5  -8   74.89    8.00
   3  -5   8  508.35   21.00
  -3   5   8  504.85   24.00
  -3  -5  -8  517.45   20.00
   3   5  -8  547.45   21.20
  -3  -5  -8  531.95   21.50
  -3   5   8  507.55   20.70
  -3  -5   8  501.75   20.80
   3   5   8  493.55   19.90
  -3   5  -8  561.24   22.10
   3  -5  -8  535.25   20.80
   3  -5  -8  481.85   24.20
  -3   5  -8  477.25   23.30
  -3  -5   8  499.75   19.90
   3   5   8  548.35   24.50
   5  -5   8    8.60    3.20
   5  -5   8   14.00    3.80
  -5   5   8   15.50    3.30
   5   5  -8   10.80    3.50
   5  -5   8    6.30    3.30
   5   5   8   10.40    2.80
  -5   5  -8    9.90    4.30
   5   5   8    6.90    4.80
  -5   5  -8    7.20    5.60
   5  -5  -8   11.00    3.90
   7   5  -8   72.39    6.90
   7  -5   8   77.89    6.70
   7  -5   8   76.69    6.70
   7  -5  -8   68.99    6.10
   7  -5  -8   72.09    7.40
   0  -6  -8   11.00    5.00
   0   6  -8    8.40    3.10
   0   6   8   10.60    3.00
   0   6   8    3.70    4.90
   0  -6  -8   11.00    3.10
   0  -6   8   11.20    3.40
   0  -6   8   14.60    3.30
   0   6  -8   13.20    4.20
   2  -6   8   49.00    6.30
   2  -6   8   47.20    5.00
  -2  -6  -8   61.99    7.80
  -2   6   8   33.60    7.60
  -2   6   8   47.80    4.80
  -2  -6  -8   40.60    4.40
   2   6  -8   40.30    5.40
   2  -6  -8   43.10    8.80
   2   6   8   41.80    8.10
  -2  -6   8   39.10    5.10
  -2  -6   8   39.30    5.20
  -2   6  -8   32.80    5.40
  -2   6  -8   54.49    7.10
   2  -6  -8   48.90    4.90
  -2  -6   8   50.49    6.50
   4  -6   8   17.30    4.80
  -4  -6  -8   16.30    3.30
   4   6  -8   14.70    3.80
   4  -6   8   18.60    4.70
  -4   6   8   20.10    6.20
  -4   6   8   23.40    5.10
   4  -6  -8   12.10    7.50
   4   6   8   14.90    6.00
   4  -6  -8   16.80    4.20
  -4   6  -8   20.60    6.00
  -4   6  -8   21.30    5.40
   4   6   8   17.70    3.50
   6  -6   8   49.99    6.70
   6  -6   8   42.60    6.20
   6   6  -8   42.40    6.10
   6  -6  -8   48.20    5.40
   6   6   8   42.30    7.50
   1   7  -8    5.10    3.20
  -1   7   8    5.40    5.30
   1   7  -8    8.60    3.80
  -1   7   8   10.40    3.20
   1  -7   8    5.80    3.30
  -1  -7  -8   16.30    3.70
  -1  -7  -8    5.80    4.20
  -1  -7   8    5.40    2.80
  -1   7  -8    5.40    3.40
  -1  -7   8    2.10    2.70
   1   7   8    8.50    5.40
   1   7   8    8.40    2.90
  -1   7  -8   10.70    4.20
   1  -7  -8    4.10    4.50
   1  -7  -8    4.00    2.60
   3  -7   8  252.87   13.00
   3  -7   8  235.58   14.80
  -3   7   8  252.27   16.20
   3   7  -8  244.18   12.70
   3   7  -8  248.98   12.60
  -3  -7  -8  244.48   11.40
  -3   7  -8  229.68   13.60
  -3  -7   8  225.78   11.50
  -3  -7   8  224.78   11.70
   3   7   8  226.18   13.40
   3   7   8  237.58   15.80
   3  -7  -8  232.48   12.10
   3  -7  -8  264.97   17.40
  -5   7   8   44.10    7.70
   5  -7   8   26.00    5.10
   5   7  -8   25.20    4.90
  -5   7  -8   37.50    6.80
   5   7   8   26.60    7.30
   5  -7  -8   27.30    5.00
  -5  -7   8   24.20    6.00
  -5   7  -8   42.60   10.00
   0  -8  -8  814.02   33.50
   0  -8  -8  781.92   30.30
   0   8   8  759.92   30.20
   0   8  -8  783.72   31.40
   0  -8   8  806.22   31.10
   0   8   8  806.22   36.00
   0   8  -8  788.72   32.20
  -2   8   8 1512.25   54.19
   2   8  -8 1521.85   55.19
   2  -8   8 1473.45   54.79
  -2  -8  -8 1510.05   55.09
  -2  -8  -8 1557.74   53.59
   2   8  -8 1475.75   54.79
  -2   8   8 1505.05   59.79
   2  -8  -8 1528.05   54.29
  -2  -8   8 1494.85   53.89
   2   8   8 1533.05   59.49
   2   8   8 1489.55   53.59
  -2   8  -8 1496.05   57.09
   4   8  -8  383.66   18.00
   4  -8   8  384.76   18.30
   4   8  -8  380.56   18.10
   4  -8  -8  401.66   18.20
  -4   8  -8  401.36   20.10
   4   8   8  381.96   18.00
   4   8   8  374.26   21.50
  -4  -8   8  396.56   17.70
  -4   8  -8  375.36   21.30
   6   8  -8  582.44   25.60
   6  -8   8  579.44   25.80
  -6   8  -8  613.74   27.60
   6   8   8  640.94   33.00
   6  -8  -8  605.04   25.50
  -1   9   8   10.90    3.60
   1  -9   8    9.20    3.20
  -1  -9  -8    1.60    2.90
  -1   9   8    1.80    5.80
   1  -9   8    1.50    3.00
   1   9  -8    5.50    3.40
  -1  -9  -8    5.30    4.70
  -1  -9   8    1.80    3.00
   1  -9  -8    4.30    3.20
   1  -9  -8    7.10    4.60
  -1  -9   8    3.70    3.00
   1   9   8    0.40    5.70
  -1   9  -8    8.10    4.80
   1   9   8    5.60    3.40
  -1   9  -8    7.60    4.10
   3   9  -8   99.89   11.00
  -3   9   8  114.99   14.50
   3  -9   8  102.49    8.50
  -3  -9  -8  106.39    7.50
   3   9  -8  107.39    8.70
  -3  -9   8   97.19    7.50
  -3   9  -8   92.29   10.00
   3  -9  -8  101.99    8.00
   3   9   8  121.89    7.60
   3   9   8  127.79   12.60
  -5   9   8   -3.50    4.80
   5   9  -8    1.60    3.00
   5  -9   8   -2.30    2.80
  -5   9  -8    0.20    4.50
   5  -9  -8   -1.40    2.80
   5   9   8    4.90    3.00
   5   9   8    3.10    6.40
   0  10  -8  346.87   18.20
   0  10   8  329.67   22.10
   0 -10  -8  357.36   17.00
   0  10   8  405.86   17.60
   0  10  -8  356.96   19.50
   0 -10   8  351.26   17.50
   0 -10  -8  378.66   19.70
  -2  10   8  320.17   21.10
   2  10  -8  311.57   16.60
  -2 -10  -8  333.97   15.60
   2 -10   8  344.67   17.00
  -2 -10  -8  353.86   16.90
   2  10  -8  293.27   17.50
   2 -10  -8  326.37   16.30
  -2  10  -8  310.37   18.50
   2  10   8  312.47   20.50
  -2 -10   8  331.17   15.90
   2  10   8  332.27   15.70
   4  10  -8  212.88   13.30
   4 -10   8  190.68   13.10
   4  10  -8  210.18   13.10
  -4  10   8  228.78   17.30
   4 -10  -8  213.18   13.00
  -4  10  -8  249.78   15.70
   4  10   8  230.08   12.00
   4  10   8  229.68   17.20
  -1 -11  -8   74.69    7.50
   1  11  -8   79.59    8.30
   1 -11   8   69.79    8.10
  -1 -11  -8   60.89   13.30
   1  11  -8   97.49    9.80
  -1  11   8   87.79   13.70
   1  11   8   83.29    7.60
   1 -11  -8   92.69    7.80
  -1 -11   8   77.89    8.20
   1 -11  -8   65.99    7.20
   1  11   8   79.09   12.90
  -1  11  -8   85.59   11.70
   3  11  -8  339.97   18.30
  -3 -11  -8  389.46   17.30
  -3  11   8  365.56   23.70
   3 -11   8  336.47   18.60
   3  11  -8  314.77   19.30
   3  11   8  359.36   17.30
   3  11   8  439.76   24.70
   3 -11  -8  353.06   18.30
  -3  11  -8  329.57   20.80
  -3 -11   8  407.96   17.50
   0 -12   8   13.30    4.50
   0 -12  -8    1.20    4.00
   0  12   8    1.40    7.50
   0  12  -8    4.20    5.40
  -2 -12  -8  136.09   14.70
   2  12  -8  138.59   12.70
   2 -12   8  152.48   11.30
   2  12  -8  134.99   11.20
  -2  12   8  147.79   17.00
  -2  12  -8  143.49   15.40
  -2 -12   8  165.38   11.30
   2 -12  -8  139.89   10.30
   2  12   8  164.88   16.10
   0   0   9    0.90    1.80
   0   0  -9    3.00    1.80
   0   0  -9   -2.10    2.90
   0   0   9   -0.30    2.90
   0   0  -9    1.00    1.80
   0   0   9    4.90    1.80
   2   0  -9    0.80    3.30
  -2   0   9    1.00    1.80
   2   0  -9   -1.90    1.50
  -2   0  -9    1.60    1.70
   2   0   9   -1.10    1.70
  -2   0  -9    1.20    2.30
   2   0   9   -1.20    1.40
  -2   0  -9   -1.70    3.50
   2   0   9   -1.90    3.00
   2   0  -9    0.70    1.70
   4   0  -9   -1.00    1.90
   4   0   9    1.60    1.90
   4   0   9    3.10    3.70
  -4   0   9    2.70    1.90
   4   0  -9    4.50    4.40
   4   0  -9    3.10    2.30
   6   0   9    1.20    2.20
   6   0  -9    0.80    2.60
   6   0  -9    3.00    5.00
  -1  -1  -9   26.40    3.90
   1   1  -9   14.80    2.90
   1   1  -9   17.30    3.10
  -1  -1  -9   27.00    6.10
  -1   1   9   19.80    3.30
   1   1  -9   11.00    4.70
  -1   1   9   24.50    5.30
   1  -1   9   19.70    3.10
   1  -1   9   20.20    5.30
  -1  -1  -9   18.40    2.70
   1  -1  -9   14.00    2.70
  -1  -1   9   15.50    3.00
   1   1   9   21.30    5.60
   1   1   9   16.60    2.70
  -1  -1   9   17.70    3.30
   1  -1  -9   14.70    3.00
  -1   1  -9   16.60    3.20
   1  -1  -9   22.70    5.70
  -1   1  -9   22.00    5.70
   1   1   9   18.30    3.30
   3  -1   9   59.49    5.10
   3   1  -9   78.79    5.60
  -3   1   9   61.29    4.80
  -3  -1  -9   68.49    7.30
   3   1  -9   66.79    5.00
   3  -1   9   54.99    4.50
  -3  -1  -9   69.39    6.50
  -3   1   9   64.59    6.40
   3   1  -9   66.09    7.50
  -3  -1   9   63.49    4.70
   3  -1  -9   56.69    8.60
   3  -1  -9   65.99    5.30
   3   1   9   66.19    9.00
  -3   1  -9   66.79    9.30
   3  -1  -9   75.39    5.20
   3   1   9   61.29    4.90
  -3   1  -9   56.99    4.80
   5   1  -9   11.60    5.40
   5  -1   9   17.10    3.60
   5   1  -9   17.40    4.00
   5   1   9   18.70    3.40
   5  -1  -9   26.00    6.20
   5  -1  -9   15.70    3.80
   5  -1  -9   22.50    3.70
   5   1   9   14.00    5.50
   7  -1   9   23.00    4.20
   7   1  -9   20.00    4.50
   7  -1  -9   25.20    5.50
   0  -2  -9  700.23   30.30
   0   2   9  742.03   26.60
   0   2  -9  678.43   29.80
   0  -2   9  701.73   26.70
   0  -2  -9  738.83   26.50
   0   2   9  729.53   29.90
   0   2  -9  721.53   26.60
   0  -2   9  692.13   26.40
  -2   2   9  740.43   27.50
   2   2  -9  764.12   28.00
  -2  -2  -9  770.42   27.70
   2   2  -9  740.53   31.00
   2  -2   9  688.83   28.60
  -2   2   9  750.82   30.40
   2   2   9  751.32   27.60
  -2   2  -9  720.73   31.20
   2   2   9  777.82   31.30
  -2  -2   9  733.93   27.40
   2  -2  -9  743.63   31.90
  -2   2  -9  769.32   27.80
   2  -2  -9  761.82   27.60
   2  -2  -9  741.33   27.50
  -2  -2   9  738.93   27.80
   4  -2   9  597.74   22.80
   4   2  -9  604.04   23.70
   4   2  -9  586.44   26.10
  -4   2   9  560.74   22.40
   4  -2   9  579.54   23.30
   4  -2  -9  603.84   23.60
   4  -2  -9  622.54   22.90
  -4   2  -9  604.84   23.20
   4   2   9  638.14   26.70
   4  -2  -9  582.04   27.00
  -4  -2   9  574.44   22.00
  -4   2  -9  572.64   25.70
   4   2   9  584.34   22.60
   6   2  -9  408.26   18.50
   6  -2   9  425.16   17.40
   6   2   9  378.36   19.70
   6  -2  -9  407.46   18.40
   6  -2  -9  385.76   20.70
  -1   3   9  205.68   10.00
  -1   3   9  225.38   13.40
  -1  -3  -9  227.08   10.20
   1   3  -9  215.88   10.40
   1  -3   9  200.58   10.30
  -1  -3  -9  203.18   13.00
   1  -3   9  201.18   10.00
   1   3  -9  218.08   13.20
  -1   3  -9  214.78   10.50
   1  -3  -9  219.58    9.60
  -1  -3   9  181.38    9.80
  -1   3  -9  198.88   13.00
   1  -3  -9  207.48   13.40
   1   3   9  225.18   13.50
   1  -3  -9  220.38   10.20
  -1  -3   9  213.48   10.10
  -3  -3  -9  380.56   17.20
   3  -3   9  365.96   15.70
   3   3  -9  378.96   18.60
  -3  -3  -9  354.66   17.40
   3   3  -9  398.96   16.50
  -3   3   9  362.16   15.50
  -3   3   9  374.76   18.20
   3  -3   9  376.46   16.50
   3  -3  -9  382.16   16.00
   3   3   9  375.96   19.20
   3  -3  -9  373.56   19.70
   3   3   9  386.56   15.60
  -3   3  -9  362.26   18.90
  -3  -3   9  355.66   16.00
   3  -3  -9  395.06   15.90
  -3  -3   9  369.36   15.20
  -3   3  -9  384.96   16.50
  -3   3  -9  388.36   16.40
   5  -3   9   94.09    6.70
   5   3  -9   99.79    7.50
   5  -3   9   81.79    6.80
   5   3  -9  110.79    9.40
   5   3   9   86.69    9.20
   5  -3  -9   91.79    9.70
   5  -3  -9   90.29    6.50
   5   3   9   98.19    6.20
   7   3  -9   87.29    7.90
   7  -3   9  100.29    7.50
   7  -3   9  119.59    8.20
   7  -3   9  102.29    8.30
   7  -3  -9   91.49    8.00
   7   3   9  121.89    9.90
   7  -3  -9   86.79   12.20
   0  -4  -9   91.99    8.70
   0  -4   9   83.59    6.00
   0   4   9   79.49    8.60
   0   4  -9   76.89    6.10
   0  -4  -9   88.09    6.00
   0   4   9   83.19    5.80
   0  -4   9   82.59    6.20
   0   4  -9   85.29    8.20
  -2  -4  -9  108.59    8.90
   2   4  -9   90.39    8.70
  -2   4   9  106.09    6.60
   2  -4   9  108.99    6.90
  -2   4   9  125.79   10.20
   2  -4   9  100.49    7.10
   2   4  -9  109.49    7.10
  -2  -4  -9  104.79    6.60
   2   4   9  101.19    6.50
  -2  -4   9  100.59    6.50
  -2   4  -9  105.49    7.30
   2  -4  -9  113.39    6.60
  -2  -4   9   93.99    6.60
  -2   4  -9  103.99    7.40
   2  -4  -9  113.79    6.90
  -2   4  -9   97.79    9.10
   2  -4  -9  108.89   10.00
   2   4   9  102.29    9.60
  -4   4   9    9.10    3.40
   4   4  -9    2.40    2.60
  -4  -4  -9    9.30    3.20
   4  -4   9   14.10    3.70
   4   4  -9    7.50    4.80
   4  -4   9   14.20    3.90
  -4   4   9   16.80    5.30
   4   4   9    5.50    4.60
  -4  -4   9    2.30    3.30
   4  -4  -9   11.90    3.50
  -4   4  -9   10.30    3.70
   4  -4  -9   10.90    3.00
   4   4   9   11.90    3.10
   4  -4  -9   24.80    7.00
  -4   4  -9   10.40    5.30
   6  -4   9    1.00    3.00
   6   4  -9   10.80    3.70
   6  -4   9    5.70    3.70
   6  -4   9    4.00    3.30
   6  -4  -9   18.40    3.70
   6  -4  -9   13.10    5.80
   6   4   9   11.60    5.40
   6  -4  -9   11.30    3.50
  -1  -5  -9  343.67   17.90
   1   5  -9  378.66   16.00
   1  -5   9  354.56   16.00
   1  -5   9  325.17   15.40
  -1   5   9  337.87   15.10
  -1   5   9  369.96   19.50
  -1  -5  -9  374.26   15.40
   1  -5  -9  355.46   15.30
   1   5   9  351.26   15.20
  -1   5  -9  352.26   15.90
  -1   5  -9  331.57   18.20
  -1  -5   9  345.77   15.40
   1   5   9  378.36   19.60
  -1  -5   9  350.66   15.50
  -1   5  -9  388.56   16.60
   1  -5  -9  345.37   18.70
   1  -5  -9  345.37   14.30
   3  -5   9  262.27   13.40
   3   5  -9  275.87   15.20
  -3  -5  -9  251.47   12.10
   3   5  -9  287.07   13.40
  -3   5   9  276.77   16.10
   3  -5   9  284.87   13.20
  -3   5  -9  291.77   14.10
  -3   5  -9  266.27   15.70
   3  -5  -9  284.37   13.00
   3   5   9  256.77   16.10
  -3  -5   9  271.37   13.00
  -3  -5   9  265.97   12.10
   3  -5  -9  275.87   12.80
   3  -5  -9  264.57   16.60
   3   5   9  255.27   12.20
  -5   5   9  179.98   10.30
   5  -5   9  206.38   11.40
   5   5  -9  210.98   11.60
   5  -5   9  192.18   11.30
   5  -5   9  202.38   11.20
   5  -5  -9  198.08   11.30
  -5   5  -9  223.48   14.10
   5   5   9  216.88   10.10
  -5   5  -9  197.08   12.00
   5  -5  -9  184.28   10.50
   5   5   9  215.28   14.00
   5  -5  -9  206.38   14.60
   7   5  -9  132.39    9.40
   7  -5   9  133.69    9.00
   7  -5   9  115.59    8.70
   7  -5  -9  127.79    9.70
   0   6  -9  668.43   25.90
   0   6   9  650.53   24.70
   0   6   9  645.74   29.50
   0  -6  -9  623.74   28.10
   0   6  -9  651.63   25.60
   0  -6  -9  625.84   24.50
   0  -6   9  568.84   25.40
   0  -6   9  591.14   24.90
   2  -6   9  289.07   14.40
   2  -6   9  288.87   14.00
   2   6  -9  314.47   14.70
  -2   6   9  288.67   13.80
  -2  -6  -9  317.47   13.80
  -2  -6  -9  306.27   15.80
   2  -6   9  309.07   14.80
  -2   6   9  285.87   17.70
  -2   6  -9  312.57   16.90
  -2  -6   9  292.37   13.70
   2   6   9  305.17   17.90
  -2   6  -9  311.97   14.90
  -2  -6   9  292.87   13.90
   2  -6  -9  304.17   14.00
   2   6   9  284.77   13.50
  -2   6  -9  298.07   15.10
   4  -6   9  442.76   20.40
  -4   6   9  460.05   23.30
  -4   6   9  490.35   20.10
   4  -6   9  482.75   21.10
   4  -6   9  478.05   20.70
  -4  -6  -9  470.25   20.40
  -4   6  -9  494.95   23.70
   4  -6  -9  502.15   24.80
   4   6   9  478.45   19.40
   4  -6  -9  484.45   20.40
   4   6   9  476.15   24.00
  -4  -6   9  504.95   20.70
  -4   6  -9  464.45   21.60
   6  -6   9  191.18   11.40
   6   6  -9  178.38   11.20
   6  -6   9  181.48   11.30
   6  -6  -9  182.38   11.40
   6  -6  -9  189.68   10.70
   6   6   9  215.28   13.80
   1   7  -9    7.70    3.70
  -1   7   9    3.30    5.70
  -1   7   9   10.00    3.20
   1  -7   9   16.50    4.50
   1   7  -9    8.70    3.60
   1  -7  -9    8.60    4.90
  -1  -7   9   16.70    4.20
  -1   7  -9   18.90    5.00
  -1   7  -9   12.80    4.10
   1  -7  -9    7.10    3.20
   3   7  -9  134.19   13.60
  -3   7   9  129.29   12.20
   3  -7   9  146.09    9.00
  -3  -7  -9  114.89    7.70
   3  -7   9  126.39   10.80
  -3  -7  -9  144.49    9.10
   3   7   9  121.59   11.90
  -3  -7   9  132.29    8.70
   3  -7  -9  125.99   11.60
   3  -7  -9  124.39    8.50
   3   7   9  127.99    7.90
  -3  -7   9  123.99    8.20
  -3   7  -9  130.99   10.40
  -5   7   9    6.20    5.60
   5  -7   9   -2.40    2.50
   5   7  -9    3.20    3.30
   5   7   9    3.70    2.70
   5  -7  -9    0.90    3.00
  -5   7  -9   -0.90    4.30
   5   7   9   -0.40    5.20
   0  -8   9  235.88   13.10
   0  -8  -9  250.57   12.60
   0   8   9  243.58   12.40
   0   8  -9  246.98   16.60
  -2   8   9   66.29   11.40
   2  -8   9   66.09    6.00
   2   8  -9   67.69    7.30
   2   8  -9   64.29    6.90
  -2   8   9   58.09    5.80
   2  -8   9   53.29    9.20
  -2  -8  -9   58.59    5.80
   2  -8  -9   58.99    8.40
   2  -8  -9   72.69   10.60
   2   8   9   71.79    6.00
  -2  -8   9   62.49    6.20
  -2  -8   9   58.59    5.90
  -2   8  -9   74.29    9.60
   2   8   9   68.39   17.40
  -2   8  -9   60.19    8.00
  -2  -8   9   69.99    6.30
   4   8  -9   55.39    7.40
  -4   8   9   66.19   10.20
  -4  -8  -9   67.89    5.60
   4   8  -9   57.29    7.60
   4  -8   9   57.59    8.00
  -4   8  -9   83.19    8.60
  -4   8  -9   42.50   11.60
   4   8   9   75.49    5.80
   4  -8  -9   56.99    6.30
   4   8   9   63.09   11.20
   1   9  -9   32.20    5.70
  -1   9   9   39.00    9.80
   1   9  -9   40.20    7.00
   1  -9   9   32.40    6.00
  -1   9   9   25.10    5.00
  -1  -9  -9   34.10    5.60
   1  -9  -9   39.00    8.80
  -1   9  -9   34.60    6.40
  -1  -9   9   36.80    5.90
   1   9   9   47.00    5.30
   1   9   9   34.90    9.30
  -1   9  -9   32.30    7.20
   3   9  -9   14.70    4.60
   3   9  -9    7.80    4.50
  -3  -9  -9   10.90    3.60
   3  -9   9   12.60    4.40
  -3   9   9   12.90    8.00
   3  -9  -9    7.90    3.80
   3   9   9   13.70    3.90
  -3  -9   9   13.60    4.10
   3   9   9    8.90    7.20
  -3   9  -9   10.20    5.20
   5   9  -9   29.80    6.00
   5  -9   9   28.40    5.70
   5   9  -9   24.90    5.40
  -5   9   9   46.70    9.40
   5   9   9   18.20    8.40
   5   9   9   32.30    5.10
  -5   9  -9   34.50    7.70
   5  -9  -9   18.60    5.00
   0  10  -9  193.48   13.50
   0 -10  -9  180.48   11.50
   0  10   9  213.88   16.60
   0 -10   9  178.78   11.80
   0  10   9  185.88   13.30
   0  10  -9  166.48   11.90
   2  10  -9  306.57   16.50
  -2  10   9  351.86   21.90
   2  10  -9  290.27   17.00
  -2 -10  -9  315.17   15.30
  -2 -10   9  316.77   15.80
   2 -10  -9  306.17   15.80
  -2  10  -9  304.47   18.20
   2  10   9  295.07   20.70
   2  10   9  317.67   18.20
   4  10  -9  133.29   10.30
   4 -10   9  131.59   10.30
  -4 -10  -9  148.99    8.80
   4  10  -9  134.69   10.80
  -4  10   9  138.69   14.10
  -4  10  -9  141.89   12.50
   4  10   9  139.69    9.40
   4  10   9  171.78   15.10
  -4 -10   9  168.48    9.60
   4 -10  -9  117.89    9.70
   1 -11   9   39.10    6.60
   1  11  -9   25.90    7.50
  -1  11   9   13.90    9.00
   1  11  -9   30.80    6.30
  -1 -11  -9   35.60    5.90
  -1  11  -9   37.90    8.10
   1  11   9   14.80    8.70
  -1 -11   9   31.40    6.00
   1 -11  -9   30.20    5.60
   3 -11   9  166.28   11.80
  -3  11   9  180.98   17.60
  -3 -11  -9  184.18   10.70
   3  11  -9  185.28   12.50
   3 -11  -9  160.18   11.10
  -3 -11   9  181.88   11.70
   3  11   9  173.48   16.20
  -3  11  -9  167.18   13.80
   3  11   9  149.59   11.20
   0   0  10   71.69    7.70
   0   0 -10   70.99    5.50
   0   0 -10   82.19    8.60
   0   0 -10   76.49    5.30
   0   0  10   75.79    5.60
   2   0  10  336.87   17.60
   2   0 -10  347.27   14.60
   2   0  10  335.57   13.60
  -2   0 -10  305.57   17.80
   2   0  10  324.57   14.50
  -2   0  10  329.77   14.20
  -2   0 -10  347.17   13.90
   2   0 -10  352.26   14.50
   2   0 -10  332.57   18.20
   4   0  10  722.73   28.30
   4   0  10  773.82   32.00
  -4   0  10  757.42   27.70
   4   0 -10  714.83   32.30
  -4   0 -10  777.02   28.10
   4   0 -10  773.72   28.00
   4   0 -10  763.92   29.00
  -4   0 -10  679.83   31.70
   6   0  10   96.79    6.50
   6   0 -10   89.39   10.30
   6   0 -10   85.39    7.50
   1   1 -10  114.39    6.90
   1   1 -10  123.19   10.10
  -1  -1 -10  102.79    5.80
   1  -1  10   92.39    6.50
  -1  -1 -10   97.29    6.60
  -1   1  10  104.89    8.90
  -1  -1 -10   86.49    9.20
  -1   1  10   98.49    6.30
   1   1 -10  110.39    6.70
   1  -1 -10   98.39    6.50
   1   1  10   98.89    5.70
   1  -1 -10   98.09    9.40
   1  -1 -10   97.69    6.10
  -1   1 -10   96.19    6.30
   1   1  10  103.99    9.20
   1   1  10  100.09    6.40
  -1  -1  10  102.09    6.40
  -1   1 -10   97.29    9.50
  -1  -1  10  102.49    6.50
   3  -1  10   29.60    4.60
  -3  -1 -10   33.30    6.60
   3   1 -10   32.60    7.00
   3  -1  10   35.40    4.50
   3   1 -10   29.90    4.60
  -3   1  10   33.60    3.90
   3   1 -10   29.00    4.30
  -3   1 -10   31.90    4.40
   3  -1 -10   32.40    4.40
  -3  -1  10   34.90    4.50
   3   1  10   36.40    4.90
   3  -1 -10   33.30    7.20
  -3   1 -10   33.00    7.10
   3  -1 -10   39.70    5.10
   3   1  10   26.90    6.50
   5   1 -10   85.99    7.00
   5   1 -10   71.29    5.90
   5  -1  10   76.79    6.70
   5   1 -10  103.19    9.80
   5   1  10   74.09    5.80
   5  -1 -10   78.89    6.80
   5  -1 -10   96.49    9.80
   5  -1 -10   85.89    6.10
   5   1  10   69.49   10.00
   7   1 -10   30.90    5.80
   7  -1 -10   28.70    5.90
   0   2  10   11.30    4.80
   0  -2 -10    8.10    4.80
   0   2 -10    6.30    4.50
   0  -2 -10    8.80    2.70
   0  -2  10   12.50    2.90
   0  -2  10   11.90    3.10
   0   2  10    9.60    2.80
   0   2 -10   10.00    2.70
   0  -2 -10   10.00    2.60
   2  -2  10  486.05   20.10
  -2   2  10  526.55   22.70
   2   2 -10  473.65   23.10
  -2   2  10  479.35   19.50
   2  -2  10  492.65   19.50
  -2  -2 -10  476.55   22.90
  -2  -2 -10  493.35   19.80
   2   2 -10  502.25   20.00
  -2  -2  10  490.65   19.90
  -2   2 -10  498.95   19.70
  -2  -2  10  478.85   19.40
  -2   2 -10  467.05   23.40
   2  -2 -10  487.85   24.10
   2   2  10  490.55   20.00
   2   2  10  508.45   23.50
   2  -2 -10  517.25   19.70
   2  -2 -10  485.85   19.60
   4  -2  10    7.20    2.60
  -4   2  10   -0.60    1.90
   4  -2  10    3.00    2.50
  -4   2 -10    3.70    2.50
  -4   2 -10    4.30    4.70
   4   2  10   -0.10    2.00
   4  -2 -10   -0.60    4.30
   4   2  10    0.10    3.90
   4  -2 -10   -1.80    2.00
   4  -2 -10    0.10    2.30
   6   2 -10  227.68   15.10
   6   2 -10  215.88   12.40
   6  -2  10  233.38   11.80
   6   2  10  234.78   11.00
   6  -2 -10  226.38   12.70
   6   2  10  216.48   14.20
   6  -2 -10  213.78   15.40
  -1  -3 -10  241.88   11.30
   1   3 -10  246.28   11.60
   1  -3  10  226.38   11.10
   1   3 -10  251.97   14.90
  -1   3  10  227.68   11.20
  -1  -3 -10  233.98   14.60
  -1   3  10  245.88   14.70
   1  -3  10  241.58   11.80
   1  -3 -10  235.98   14.70
   1  -3 -10  248.08   10.80
  -1   3 -10  239.58   11.60
  -1   3 -10  205.08   14.20
  -1  -3  10  215.58   11.00
   1  -3 -10  256.37   11.50
   1   3  10  220.68   14.50
   1   3  10  234.18   11.30
  -1  -3  10  231.18   11.30
  -3   3  10   80.79    8.20
  -3  -3 -10   72.49    5.90
   3   3 -10   72.89    6.30
   3  -3  10   75.79    5.90
  -3   3  10   75.99    5.60
   3  -3  10   78.69    6.40
  -3  -3 -10   81.19    8.10
   3   3 -10   79.59    9.90
  -3  -3  10   73.49    5.50
   3  -3 -10   79.29   11.00
  -3   3 -10   74.79    6.30
  -3   3 -10   71.29    6.30
   3   3  10   70.19    6.30
   3   3  10   78.89    9.00
  -3   3 -10   74.99   10.00
   3  -3 -10   75.29    5.90
   3  -3 -10   78.59    6.00
   5   3 -10  161.48   10.10
  -5   3  10  171.38    8.90
   5  -3  10  170.68    9.70
   5  -3  10  180.38    9.50
   5   3 -10  189.58   13.00
   5  -3 -10  156.28    9.10
   5   3  10  166.88    8.90
   5   3  10  152.78   12.10
  -5   3 -10  152.28    9.60
   5  -3 -10  142.49    9.60
   7  -3  10   64.49    6.60
   7  -3  10   70.59    6.60
   7  -3  10   65.69    7.20
   7   3 -10   69.79    7.20
   7  -3 -10   61.39    8.20
   7   3  10   79.79   15.90
   0   4  10  286.47   13.00
   0  -4 -10  304.67   17.00
   0   4 -10  250.67   15.80
   0   4  10  290.97   16.80
   0  -4  10  269.87   13.20
   0  -4 -10  302.97   13.20
   0  -4  10  268.17   13.00
   0   4 -10  291.47   13.50
  -2  -4 -10  703.33   30.00
   2   4 -10  707.03   30.70
   2  -4  10  717.83   27.40
  -2  -4 -10  732.13   27.00
   2   4 -10  724.23   27.60
  -2   4  10  702.83   31.00
  -2   4  10  699.33   27.00
   2  -4  10  703.53   27.90
   2  -4 -10  720.53   27.20
   2   4  10  700.63   26.90
   2  -4 -10  738.23   26.80
   2  -4 -10  705.03   31.80
  -2  -4  10  666.43   26.80
  -2   4 -10  641.74   30.50
  -2   4 -10  705.23   27.70
  -2   4 -10  757.82   28.20
   2   4  10  710.53   31.30
   4  -4  10 1066.09   40.50
  -4   4  10 1011.20   41.90
   4  -4  10 1112.49   40.10
   4   4 -10 1118.29   41.50
   4   4 -10 1100.09   43.30
  -4  -4 -10 1108.39   40.80
  -4   4  10 1101.59   42.70
   4  -4 -10 1084.29   40.20
   4  -4 -10 1148.19   43.00
  -4   4 -10 1107.79   40.90
   4   4  10 1111.29   44.20
  -4  -4  10 1065.79   40.60
  -4   4 -10 1029.20   43.40
   4   4  10 1061.99   39.30
   6  -4  10 1264.67   46.00
   6  -4  10 1320.77   46.40
   6   4 -10 1277.87   49.60
   6   4 -10 1195.98   46.70
   6  -4  10 1219.08   46.30
   6   4  10 1241.58   49.30
   6  -4 -10 1199.68   46.70
   6  -4 -10 1265.47   45.60
  -1  -5 -10  101.19    6.90
  -1   5  10  100.29   10.00
  -1  -5 -10  105.69    9.70
   1   5 -10   89.79    7.10
   1  -5  10   92.69    6.90
   1  -5  10   86.89    7.00
   1   5 -10   93.79    9.60
  -1   5  10   96.49    6.70
  -1   5 -10  101.09    7.40
  -1   5 -10  109.29    9.70
   1   5  10   86.49    9.80
   1  -5 -10  105.19   10.20
   1  -5 -10   93.19    6.00
   1  -5 -10  105.89    7.00
   1   5  10   95.29    6.70
  -1   5 -10  102.49    7.80
  -3  -5 -10   91.69    8.20
  -3  -5 -10   61.39    5.50
  -3   5  10   79.49   10.40
   3   5 -10   73.59    6.50
   3  -5  10   66.49    6.30
   3  -5  10   69.79    6.10
   3   5 -10   80.29    8.80
  -3   5 -10   55.39    6.20
   3  -5 -10   60.99    5.70
  -3  -5  10   55.59    5.80
   3  -5 -10   63.19    5.70
   3   5  10   69.69    5.70
  -3   5 -10   81.99    9.20
  -3   5 -10   72.99    8.60
   3   5  10   81.69   11.20
   5  -5  10   78.89    6.70
   5   5 -10   64.59    6.70
   5  -5  10   68.79    6.70
   5  -5  10   64.39    6.50
  -5  -5 -10   82.09    6.30
   5   5 -10   73.89    9.80
   5  -5 -10   57.09    5.90
  -5   5 -10   63.59   10.30
   5   5  10   88.49    9.70
   5  -5 -10   58.29    6.30
  -5   5 -10   59.19    7.90
   0   6 -10  110.39    8.30
   0  -6 -10  106.29    7.40
   0   6 -10  123.79    8.70
   0  -6  10  103.19    7.80
   0   6  10  109.09    7.40
   0   6  10  116.59   11.30
   2  -6  10  744.73   30.30
   2   6 -10  737.63   32.60
  -2  -6 -10  764.12   29.10
  -2  -6 -10  789.92   31.90
  -2   6  10  733.63   33.90
   2   6 -10  768.02   30.20
   2  -6  10  716.23   30.00
  -2   6 -10  751.82   30.70
   2   6  10  755.52   29.20
   2  -6 -10  819.72   28.90
   2  -6 -10  774.52   29.60
   2   6  10  772.12   34.40
  -2   6 -10  773.22   30.60
   4  -6  10   49.90    5.60
   4   6 -10   53.89    6.80
   4  -6  10   58.89    7.60
   4   6 -10   58.29    9.90
  -4  -6 -10   49.50    5.20
   4  -6  10   50.39    5.90
  -4   6  10   49.70    8.60
   4  -6 -10   48.10    6.40
  -4  -6  10   53.69    5.00
   4   6  10   69.19   10.50
   4   6  10   56.69    5.30
  -4   6 -10   54.49    8.30
   4  -6 -10   48.10    5.50
   6   6 -10  303.07   16.00
   6  -6  10  312.17   15.90
   6  -6  10  309.97   16.80
   6  -6 -10  289.27   15.90
   6  -6 -10  320.57   15.20
   6   6  10  307.87   18.30
  -1   7  10   72.09   12.40
   1  -7  10   74.79    6.90
   1   7 -10   66.49    7.10
  -1  -7 -10   71.79    6.40
   1  -7  10   82.09    7.10
   1  -7  10   70.09    6.90
   1   7 -10   80.79   10.80
  -1  -7  10   65.69    6.80
   1   7  10   76.79   12.20
   1   7  10   74.89    6.40
   1  -7 -10   71.89    6.40
  -1   7 -10   63.49    8.80
   1  -7 -10   73.79    5.60
   1  -7 -10   89.69   14.20
   3  -7  10    7.10    3.40
   3  -7  10   11.20    4.10
   3  -7  10   21.20    4.70
   3   7 -10   12.00    4.10
  -3  -7 -10   14.30    3.70
   3  -7 -10    6.40    3.30
   3  -7 -10   12.00    3.80
  -3   7 -10   19.00    5.00
  -3  -7  10    3.70    3.20
  -3   7 -10   10.20    6.30
   3   7  10   18.30    4.20
  -3  -7  10    9.00    3.30
   5  -7  10   80.79    7.50
   5  -7  10   66.19    8.50
   5   7 -10   65.39    6.90
   5   7 -10   76.69   10.60
   5  -7 -10   74.39    7.30
  -5   7 -10   58.29   10.90
  -5   7 -10   57.59    8.40
   5  -7 -10   65.59    6.60
   5   7  10   70.99   10.70
   0  -8  10   47.50    7.50
   0  -8  10   53.29    9.20
   0  -8 -10   80.49   10.80
   0   8 -10   59.39    7.70
   0   8 -10   57.99    8.00
   0  -8 -10   49.90    5.80
   0  -8  10   57.39    6.40
   0   8  10   75.89   12.20
   2  -8  10  122.99    9.40
   2  -8  10  120.69    9.30
   2   8 -10  122.59    9.50
  -2   8  10  126.49   12.80
  -2  -8 -10  130.59    8.60
  -2  -8 -10  152.08   11.20
   2   8 -10  128.99    9.90
  -2  -8  10  135.89    9.20
  -2   8 -10  126.79   10.50
   2  -8 -10  129.19    9.00
   2   8  10  154.58   13.90
   2   8  10  148.09    9.00
  -2   8 -10  138.79   10.00
   4   8 -10  304.17   16.20
  -4  -8 -10  340.77   15.10
   4  -8  10  315.17   16.70
  -4   8  10  342.57   20.10
   4   8 -10  310.67   16.60
  -4   8 -10  332.07   18.30
   4  -8 -10  328.17   16.30
   4   8  10  334.07   15.20
   4   8  10  334.07   20.50
   1   9 -10   54.39    8.20
   1  -9  10   49.99    7.40
  -1  -9 -10   65.79    9.80
  -1  -9 -10   47.00    6.50
   1   9 -10   51.19    7.70
  -1   9  10   51.49   11.10
   1  -9 -10   42.20    6.30
  -1   9 -10   44.70    8.10
  -1  -9  10   49.00    6.90
  -1   9 -10   42.80    7.20
   1   9  10   52.09    5.80
   1   9  10   58.99   12.00
  -3  -9 -10   45.30    6.30
   3   9 -10   66.89    7.60
  -3   9  10   74.49   12.10
   3  -9  10   53.09    7.60
   3   9 -10   50.09    7.40
   3   9  10   52.79    6.00
  -3  -9  10   61.89    6.50
  -3   9 -10   52.59    9.00
   3  -9 -10   53.09    7.30
   3   9  10   61.89   10.60
   0 -10  10   47.80    7.20
   0 -10 -10   36.60    6.00
   0  10 -10   30.00    7.50
   0  10  10   30.90    9.90
   0  10 -10   36.00    6.80
   2 -10  10   17.20    4.70
  -2 -10 -10   11.50    6.10
   2  10 -10   26.50    6.30
   2  10 -10    7.50    4.30
  -2  10  10   23.50    9.30
  -2 -10 -10   16.20    4.50
  -2  10 -10   24.80    6.20
  -2 -10  10   20.90    4.60
   2  10  10   15.10    8.60
   2  10  10   22.30    4.60
   2 -10 -10   14.60    4.70
  -1 -11 -10  126.79    9.50
  -1  11  10  139.89   16.00
   1 -11  10  136.89   10.20
  -1  11 -10  137.59   12.50
   1 -11 -10  133.39   10.00
   1  11  10  154.18   15.80
   0   0 -11    1.20    2.20
   0   0  11    2.80    2.40
   0   0 -11    0.80    4.00
   0   0 -11    2.80    2.10
   0   0  11    2.40    2.10
   0   0  11    1.40    3.90
  -2   0  11    0.40    1.80
   2   0 -11   -1.50    1.90
   2   0  11    2.10    2.50
   2   0  11    0.90    3.70
  -2   0 -11    5.30    4.80
   2   0  11   -0.60    1.70
   2   0 -11    0.80    2.50
   2   0 -11   -0.10    4.50
   4   0  11    0.70    2.30
   4   0 -11   -0.50    2.50
   4   0 -11   -1.10    2.20
   4   0 -11   -1.10    4.90
  -4   0 -11    2.90    2.30
   6   0 -11    6.80    6.30
   6   0 -11    1.20    2.80
   1   1 -11    3.10    4.50
  -1   1  11   -0.90    1.90
  -1  -1 -11   -2.30    3.70
  -1  -1 -11    0.50    2.40
  -1   1  11   -2.40    3.40
  -1  -1 -11   -0.20    1.60
   1   1 -11    2.90    2.40
   1   1 -11   -1.60    2.10
   1  -1  11   -1.70    2.00
   1  -1  11    0.40    1.90
  -1  -1  11   -0.50    2.00
  -1  -1  11    2.90    2.30
   1  -1 -11    2.40    2.10
   1  -1 -11   -1.00    1.80
   1   1  11   -0.70    1.90
   1  -1 -11   -0.60    4.30
  -1   1 -11   -0.20    1.90
  -1   1 -11    1.30    4.30
   1   1  11    1.10    4.10
  -3   1  11   13.50    3.20
   3   1 -11   11.30    6.10
   3   1 -11   14.60    3.60
  -3  -1 -11   15.60    5.90
   3  -1  11   16.60    4.00
   3   1 -11   12.10    3.60
   3  -1 -11   11.60    3.10
  -3   1 -11   13.80    6.00
  -3  -1  11   14.70    3.30
   3  -1 -11   18.30    6.90
  -3   1 -11   18.10    3.80
   3  -1 -11    9.70    3.00
   3   1  11    4.00    4.90
   3   1  11   12.00    3.50
   5   1 -11    0.10    3.00
   5   1 -11   -2.10    2.30
   5   1 -11   -3.40    4.70
   5  -1  11    0.10    2.50
   5   1  11    1.30    4.40
   5   1  11    0.40    2.70
   5  -1 -11    6.30    2.90
   5  -1 -11    2.40    2.30
   7  -1  11    5.80    4.10
   7   1 -11    2.90    3.80
   7   1 -11    3.50    6.50
   7  -1 -11   18.30    4.40
   0  -2  11  318.37   14.10
   0  -2  11  302.57   14.40
   0   2 -11  330.47   14.30
   0  -2 -11  329.27   13.50
   0   2  11  305.77   14.20
   0   2  11  350.36   18.10
   0   2 -11  302.47   17.90
   0  -2 -11  318.57   14.30
   0  -2 -11  320.87   18.50
  -2  -2 -11 1735.73   59.69
  -2   2  11 1659.93   62.69
   2   2 -11 1706.03   64.49
   2  -2  11 1754.02   59.29
   2  -2  11 1660.43   59.99
   2   2 -11 1732.93   59.99
  -2  -2 -11 1656.33   63.69
   2  -2 -11 1627.84   64.89
  -2   2 -11 1761.82   59.59
   2   2  11 1707.73   63.99
  -2  -2  11 1726.33   59.79
   2   2  11 1728.63   59.69
   2  -2 -11 1741.03   59.39
  -2  -2  11 1709.13   59.39
  -2   2 -11 1542.55   63.79
   2  -2 -11 1745.63   59.69
   4  -2  11   78.99    6.20
   4   2 -11   92.99   10.00
   4  -2  11   80.09    6.60
   4   2  11  100.09   12.30
   4  -2 -11   73.29    6.60
   4   2  11   74.89    6.10
   4  -2 -11   91.89   10.40
  -4   2 -11   79.39   10.90
   4  -2 -11   81.69    6.90
  -4   2 -11   79.19    6.70
   6   2 -11  600.74   30.20
   6   2 -11  534.05   24.00
   6  -2  11  558.94   22.90
   6  -2 -11  558.44   22.60
   6  -2 -11  533.65   24.00
   1  -3  11  110.79    7.30
  -1   3  11  119.69   10.60
   1   3 -11  109.69    7.50
   1   3 -11  136.79   11.30
  -1  -3 -11  112.39    7.40
   1  -3  11  112.99    7.70
  -1   3  11  123.89    7.50
  -1  -3 -11  118.09   10.80
  -1  -3  11  111.39    8.40
   1  -3 -11   70.39   14.00
   1   3  11  108.59    7.30
  -1   3 -11  118.49    7.90
  -1   3 -11  105.59   10.40
   1  -3 -11  124.49    7.10
  -1  -3  11  108.79    7.40
   1  -3 -11  122.99    7.60
   1   3  11  109.69   10.40
  -3   3  11   82.19    8.50
   3  -3  11   75.39    6.10
   3   3 -11   83.89    9.20
   3   3 -11   77.29    6.60
   3  -3  11   65.89    6.20
  -3   3 -11   69.29    6.30
   3  -3 -11   75.59    6.20
  -3   3 -11   82.49   10.80
   3  -3 -11   81.49   11.60
   3  -3 -11   64.29    5.80
  -3   3 -11   70.59    6.70
  -3  -3  11   60.89    5.70
   5  -3  11   77.69    6.60
   5   3 -11   77.99    7.20
   5  -3  11   84.89    6.40
   5   3 -11   83.49   10.90
   5   3  11   87.59    9.00
   5  -3 -11   75.29    6.40
   5   3  11   81.39   11.30
   5  -3 -11   70.09   11.40
   5  -3 -11   63.69    6.70
  -5   3 -11   70.19   10.30
   0  -4 -11   33.30    5.00
   0   4  11   32.50    4.80
   0  -4  11   35.50    5.00
   0  -4 -11   32.30    3.70
   0   4  11   23.40    6.80
   0   4 -11   30.80    5.10
   0  -4  11   30.30    5.20
   0  -4 -11   42.00    7.90
  -2   4  11   45.00    8.00
   2  -4  11   29.30    5.30
   2  -4  11   27.50    4.70
  -2  -4 -11   30.00    4.80
   2   4 -11   34.90    5.30
   2   4 -11   34.30    7.00
  -2  -4 -11   42.00    7.60
  -2   4 -11   31.60    7.70
   2   4  11   29.40    4.50
  -2  -4  11   33.90    5.20
  -2   4 -11   29.30    5.30
   2  -4 -11   23.20    4.10
   2  -4 -11   26.40    4.50
   2   4  11   26.30    7.50
  -2   4 -11   27.90    4.80
  -4   4  11   12.20    5.20
   4   4 -11   17.10    4.20
   4  -4  11    6.70    3.70
   4  -4  11   20.00    4.20
  -4   4  11   14.00    3.70
   4   4 -11   14.90    6.30
  -4  -4 -11   13.40    3.90
  -4  -4  11    7.70    4.10
  -4   4 -11   21.80    7.30
   4   4  11    8.50    3.60
   4   4  11    9.70    5.70
   4  -4 -11    8.20    3.40
  -4   4 -11   12.50    4.20
  -4  -4  11   13.90    4.60
   4  -4 -11    7.80    3.50
   4  -4 -11   14.20    6.90
   6  -4  11    6.30    4.00
   6  -4  11    7.20    3.80
   6   4 -11    3.00    3.30
   6   4 -11    5.20    6.50
   6  -4  11    6.90    3.70
   6   4  11    6.40    3.10
   6  -4 -11    7.00    3.80
   6   4  11    2.90    5.20
   6  -4 -11    4.20    3.20
  -1   5  11   74.89    6.30
  -1  -5 -11   83.39    6.70
   1   5 -11   91.49    9.80
  -1   5  11   85.29   11.40
   1  -5  11   81.49    6.70
   1  -5  11   80.09    7.00
   1   5 -11   82.99    7.00
   1   5  11   73.59    6.30
   1   5  11  103.99   10.50
   1  -5 -11   77.09    6.50
   1  -5 -11   80.09    5.80
  -1   5 -11   86.69    7.20
  -1   5 -11   87.79    7.60
  -3  -5 -11  163.88    9.70
   3   5 -11  176.48   19.10
   3   5 -11  172.28   10.50
  -3   5  11  160.08   13.00
   3  -5  11  172.38   10.70
  -3  -5  11  196.58   10.00
  -3   5 -11  169.28   11.00
   3  -5 -11  166.78    9.90
   3   5  11  181.48    9.80
  -3  -5  11  188.18   10.60
  -3   5 -11  184.68   11.00
   3  -5 -11  187.98   14.00
   3   5  11  150.48   13.10
   3  -5 -11  165.58    9.70
   5  -5  11   37.90    6.00
   5   5 -11   29.40    8.30
  -5  -5 -11   41.50    6.40
   5  -5  11   25.20    5.00
   5   5 -11   32.70    5.80
   5  -5  11   33.20    6.30
   5   5  11   49.99    9.50
   5  -5 -11   26.40    5.00
  -5   5 -11   26.70    5.70
   5  -5 -11   32.10    5.20
   5   5  11   34.20    5.30
   0   6  11  258.47   17.50
   0   6 -11  273.77   14.10
   0  -6 -11  264.37   13.20
   0  -6  11  252.77   13.50
   0   6  11  278.07   13.30
   0   6 -11  255.97   14.10
   0  -6  11  267.07   13.60
  -2  -6 -11  986.60   38.90
  -2   6  11  907.41   43.40
   2   6 -11  893.91   39.60
   2  -6  11  938.31   36.30
  -2   6  11  994.60   36.10
  -2  -6 -11  949.80   35.50
   2   6 -11  926.31   36.50
   2   6  11  969.80   35.80
  -2   6 -11  906.11   40.10
   2  -6 -11  992.60   35.10
  -2  -6  11  976.50   35.80
  -2   6 -11  931.11   41.20
  -2   6 -11  863.11   38.20
   2   6  11 1005.40   48.00
   4   6 -11   85.79    7.90
   4   6 -11  111.69   11.40
   4  -6  11   93.49    8.00
   4  -6  11  102.09    8.20
  -4  -6 -11   91.29    6.90
  -4   6  11   83.09   12.70
   4  -6 -11   83.79    7.20
  -4   6 -11   89.59    8.60
  -4   6 -11  112.49   12.00
   4  -6 -11   89.29    7.30
   4   6  11  107.59   11.10
   6  -6  11  327.37   17.00
   6   6 -11  330.67   17.00
   6  -6  11  308.87   16.60
   6  -6 -11  342.67   16.20
   6  -6 -11  326.47   17.10
   6   6  11  336.57   19.70
   1   7 -11   14.30    4.40
   1   7 -11    4.70    5.60
   1  -7  11    4.50    3.50
  -1   7  11   10.40    6.40
  -1   7  11   15.20    3.90
   1  -7  11    6.20    3.50
  -1  -7 -11    7.80    3.60
   1   7 -11    7.70    3.80
   1  -7  11   14.90    4.30
  -1  -7  11    8.20    4.10
  -1   7 -11    6.30    3.70
   1   7  11    9.50    6.10
  -1   7 -11    9.90    4.60
  -1  -7  11    3.50    4.40
  -1  -7  11   11.40    4.40
   1   7  11   18.70    4.00
  -1   7 -11    2.70    5.90
   1  -7 -11   10.80    6.40
  -3  -7 -11    2.70    5.20
  -3  -7 -11    7.40    3.40
  -3   7  11    9.80    6.20
   3  -7  11    4.70    3.70
   3  -7  11    4.90    3.60
   3   7 -11    4.30    3.40
   3   7  11    2.60    5.60
   3  -7 -11    4.60    3.00
   3  -7 -11    1.80    3.10
   3   7  11    5.00    3.50
  -3  -7  11    4.20    3.20
  -3   7 -11    5.70    4.40
  -5   7  11    7.30    6.10
   5   7 -11    9.20    4.60
   5  -7  11   13.50    4.60
  -5   7 -11   18.30    5.30
   5  -7 -11    7.70    4.10
   5   7  11   13.10    4.00
   5   7  11    6.00    6.70
   5  -7 -11   16.50    5.00
   0   8  11  165.98   14.90
   0  -8 -11  155.18   14.70
   0  -8  11  163.58   10.90
   0   8 -11  147.69   10.80
   0   8 -11  152.28   11.30
   0   8  11  194.78   10.50
   2  -8  11   53.79    7.50
  -2   8  11   43.70    9.40
  -2  -8 -11   45.00    6.30
   2   8 -11   46.50    7.20
   2   8 -11   39.80    6.50
  -2   8 -11   34.60    7.20
   2   8  11   40.90    9.40
  -2  -8  11   38.50    6.20
  -2   8 -11   39.20    6.80
   2   8  11   58.09    6.00
   2  -8 -11   48.30    5.80
   2  -8 -11   47.20    6.50
   4  -8  11   75.09    8.20
  -4   8  11   91.09   12.70
  -4  -8 -11   89.59    7.00
   4   8 -11   77.99    9.40
   4   8 -11   73.59    8.20
  -4  -8  11  102.59    7.00
   4  -8 -11   71.09    7.40
   4   8  11   93.39   13.20
   4  -8 -11   90.29    7.80
   4   8  11   83.09    7.20
   1   9 -11   -0.40    3.80
   1  -9  11    0.50    3.30
  -1   9  11   -0.90    5.80
   1   9 -11    0.40    3.20
   1   9  11    0.10    5.90
  -1   9 -11    0.20    3.80
  -1   9 -11   -2.30    2.70
  -1  -9  11    1.40    3.10
   1  -9 -11    9.50    3.70
   1   9  11    3.50    3.30
  -3   9  11   30.80    8.70
   3  -9  11   33.30    6.20
   3   9 -11   33.40    6.40
  -3  -9 -11   32.40    5.40
   3   9 -11   30.10    6.70
   3  -9 -11   28.20    5.60
   3   9  11   38.20   10.10
  -3   9 -11   42.00    8.00
   3  -9 -11   32.70    5.40
   3   9  11   29.60    9.10
   0 -10 -11   18.90    5.00
   0  10 -11    8.20    5.40
   0  10 -11   16.50    5.50
   0  10  11    7.10    7.90
   0 -10  11   20.10    5.50
   2  10 -11  589.54   27.60
  -2  10  11  633.94   33.80
   2  10 -11  607.94   28.60
   2 -10  11  623.14   27.90
   2 -10 -11  601.04   27.00
  -2  10 -11  578.24   29.00
   2  10  11  708.93   34.60
  -2 -10  11  661.23   27.10
   2 -10 -11  660.53   25.60
   0   0 -12 3642.24  120.99
   0   0 -12 3664.63  120.09
   0   0  12 3596.54  124.49
   0   0  12 3428.36  120.69
   0   0  12 3675.23  120.09
   0   0 -12 3404.36  126.49
   2   0 -12  925.81   33.80
  -2   0 -12  881.21   38.60
   2   0  12  923.61   32.70
   2   0 -12  839.72   38.60
   2   0  12  863.21   37.40
   2   0  12  881.71   33.80
   2   0 -12  934.21   33.80
   4   0 -12 1555.54   54.09
  -4   0  12 1569.34   53.89
   4   0 -12 1559.34   55.09
  -4   0 -12 1441.46   57.39
  -4   0 -12 1594.14   54.39
   4   0  12 1429.86   54.19
   4   0 -12 1461.35   65.19
   6   0  12  126.99    8.30
   6   0 -12  103.89    8.90
   1   1 -12   32.10    4.70
   1   1 -12   38.00    8.30
  -1   1  12   31.20    4.80
  -1  -1 -12   27.40    4.10
  -1  -1 -12   33.00    5.30
   1  -1  12   29.10    4.90
   1   1 -12   30.60    5.10
  -1   1  12   37.80    7.30
  -1  -1 -12   37.10    8.20
   1  -1  12   35.60    4.70
  -1  -1  12   25.60    4.20
   1   1  12   31.10    7.10
  -1   1 -12   36.40    8.10
   1   1  12   25.10    4.20
   1   1  12   38.70    4.20
   1  -1 -12   26.60    4.70
  -1   1 -12   32.00    4.70
   1  -1 -12   32.90    4.70
  -1  -1  12   32.90    5.30
   3  -1  12   69.89    6.50
   3  -1  12   76.99    5.90
   3   1 -12   70.69    6.60
  -3  -1 -12   96.49   10.10
   3   1 -12  110.79   10.80
   3   1 -12   68.89    6.30
   3   1  12   84.09    9.60
   3  -1 -12   85.59   16.90
  -3   1 -12   71.19    6.10
   3  -1 -12   81.99    6.60
   3  -1 -12   82.09    6.50
  -3   1 -12   87.59   11.80
   3   1  12   69.09    6.40
   5  -1  12   81.29    6.50
   5   1 -12   66.69    6.80
   5   1 -12   60.69    5.90
   5   1 -12   65.29   11.10
  -5  -1  12   49.50    5.90
   5   1  12   55.79   10.00
   5  -1 -12   71.79    6.70
   5  -1 -12   62.59    5.90
   5  -1 -12   48.60    9.70
   5   1  12   72.19    6.10
   0  -2 -12  228.08   10.30
   0   2 -12  222.88   11.10
   0  -2  12  209.58   10.80
   0  -2  12  189.88   10.90
   0  -2 -12  224.58   15.50
   0  -2 -12  195.08   10.90
   0   2  12  212.58   14.20
   0   2  12  217.38   11.10
  -2  -2 -12  124.79    8.30
   2   2 -12  160.18   12.30
   2  -2  12  136.69    8.70
   2   2 -12  126.89    8.40
  -2  -2 -12  146.69   12.30
   2  -2  12  121.09    7.90
  -2   2  12  124.79   10.70
   2  -2 -12  135.99    8.20
  -2   2 -12  146.59   12.50
  -2   2 -12  120.49    8.10
   2   2  12  124.99   11.30
   2   2  12  136.09    8.50
   2  -2 -12  125.29    8.20
   2  -2 -12  151.28   12.80
  -2  -2  12  129.89    8.50
   4  -2  12  187.58   10.00
   4   2 -12  180.88   11.00
   4  -2  12  175.78   10.40
  -4  -2 -12  218.68   13.10
   4   2 -12  190.68   18.70
  -4   2  12  179.78   10.00
   4   2  12  180.28   14.90
   4  -2 -12  207.08   14.90
  -4  -2  12  203.28    9.90
  -4   2 -12  174.98   10.50
   4   2  12  185.28   10.30
   4  -2 -12  171.98   10.60
  -4   2 -12  182.88   14.00
   4  -2 -12  171.58   10.10
   6  -2  12  100.09    7.90
   6   2 -12   97.29    8.50
   6   2  12  102.79    7.80
   6  -2 -12   99.49    7.50
   6   2  12  127.09   11.00
   6  -2 -12   95.89    8.50
  -1  -3 -12   48.40    8.60
  -1  -3 -12   41.50    5.80
  -1   3  12   45.00    5.10
   1   3 -12   42.20    5.70
  -1   3  12   31.30    7.80
   1   3 -12   43.70    7.60
   1  -3 -12   43.50    5.20
  -1  -3  12   40.60    5.60
   1  -3 -12   35.90    5.50
   1   3  12   44.60    5.10
  -1   3 -12   44.50    8.80
   1   3  12   42.90    8.50
   3  -3  12   63.79    6.30
  -3  -3 -12   75.89    6.50
  -3  -3 -12   96.79    9.70
   3  -3  12   72.69    6.60
  -3   3  12   80.59   10.40
   3   3 -12   74.19    7.00
  -3  -3  12   78.89    6.10
  -3   3 -12   66.79    6.50
   3  -3 -12   70.59    6.70
   3  -3 -12   71.89    6.30
  -3   3 -12   65.09    6.80
  -3   3 -12   81.99   12.10
   3   3  12   79.39   11.50
   3   3  12   73.99    6.40
   5  -3  12   74.29    6.80
   5   3 -12   69.09    7.00
   5   3 -12   79.09   11.80
   5  -3  12   78.29    6.60
  -5   3 -12   65.49    6.70
   5  -3 -12   53.89    5.90
   5  -3 -12   60.19    6.60
  -5   3 -12   63.59   11.10
   0   4  12 1210.88   44.50
   0  -4  12 1180.08   44.50
   0  -4 -12 1259.67   44.60
   0   4  12 1200.28   49.20
   0   4 -12 1262.67   45.10
   0  -4  12 1183.78   47.30
  -2   4  12   14.80    3.40
   2  -4  12    4.70    3.10
  -2   4  12    4.70    4.90
   2   4 -12    3.70    7.80
   2  -4  12    5.20    3.30
  -2  -4 -12    5.90    3.10
   2   4 -12    4.30    3.80
  -2  -4 -12   -2.60    4.70
   2   4  12    6.70    4.90
   2   4  12    5.20    2.90
   2  -4 -12    4.10    2.90
  -2  -4  12    6.10    3.30
  -2   4 -12    6.00    3.70
  -2   4 -12    6.10    3.50
   2  -4 -12    3.80    2.80
  -2  -4  12    4.40    3.00
   4  -4  12  472.55   20.90
  -4   4  12  445.56   22.30
   4  -4  12  502.95   21.80
   4   4 -12  437.36   24.40
  -4  -4 -12  467.85   20.10
   4   4 -12  469.45   21.00
   4   4  12  430.46   24.10
   4  -4 -12  457.35   20.50
  -4  -4  12  479.65   21.70
   4  -4 -12  478.15   20.30
  -4   4 -12  467.85   22.80
   4   4  12  491.05   20.10
   6  -4  12  120.99    8.80
   6   4 -12   97.79    8.70
   6  -4  12  107.29    8.90
   6  -4 -12  109.39    8.70
   6   4  12  101.69   11.10
   6  -4 -12  113.99    8.10
   6   4  12   98.89    7.70
   1  -5  12   28.50    5.10
   1  -5  12   21.90    4.40
  -1   5  12   21.10    4.40
  -1   5  12   18.80    8.90
  -1  -5 -12   19.10    4.30
   1   5 -12   31.20    7.20
   1   5  12   21.50    4.40
  -1   5 -12   24.50    5.10
   1  -5 -12   22.70    4.70
   1  -5 -12   17.30    7.40
   1  -5 -12   12.00    3.10
  -1   5 -12   13.70    6.30
  -1  -5  12   23.60    4.70
  -3  -5 -12   61.59    6.10
   3  -5  12   77.19    6.80
   3  -5  12   80.19    7.20
  -3  -5 -12   88.69    9.70
   3   5 -12   69.59   10.00
   3   5 -12   53.49    7.10
  -3   5  12   63.09   11.10
   3   5  12   70.69    6.40
  -3   5 -12   62.99   10.10
   3   5  12   74.39   11.80
   3  -5 -12   64.19    6.40
   3  -5 -12   55.89    9.80
  -3   5 -12   66.79    8.80
   5  -5  12   45.50    7.00
   5   5 -12   35.70    6.30
   5  -5  12   41.60    6.70
  -5  -5 -12   53.29    6.20
   5  -5 -12   36.70    5.80
   5   5  12   38.00    5.80
  -5   5 -12   45.20   10.30
  -5   5 -12   48.80    7.50
   5  -5 -12   32.30    5.80
   5   5  12   54.69    9.60
   0  -6 -12  117.19    8.40
   0  -6  12  121.19    8.40
   0   6 -12  115.39    9.00
   0  -6 -12  143.09   12.70
   0  -6  12  133.69    8.70
   0   6 -12  112.79    9.20
   0   6  12  118.19    8.30
   0   6  12  110.89   11.80
  -2   6  12    7.30    5.90
   2   6 -12   23.10    4.80
  -2  -6 -12   16.20    4.20
   2  -6  12    9.90    4.10
   2  -6  12   15.50    4.60
   2   6 -12   12.30   11.20
  -2   6 -12    9.40    4.10
   2  -6 -12   12.50    3.90
  -2   6 -12   19.00    5.30
   2   6  12    8.10    3.80
   2  -6 -12   11.00    3.50
   2   6  12   21.80    7.60
   4   6 -12   22.50    5.10
   4  -6  12   36.20    6.60
   4  -6  12   40.00    6.60
  -4   6  12   16.30    7.30
  -4  -6 -12   38.60    5.90
   4   6  12   36.90    5.40
   4  -6 -12   37.20    6.00
  -4   6 -12   36.10    6.80
   4   6  12   27.10    8.20
   4  -6 -12   31.80    5.70
   1   7 -12   21.00    5.20
  -1  -7 -12   16.30    7.50
  -1  -7 -12   14.10    4.00
  -1   7  12   12.40    7.10
   1  -7  12   14.90    4.70
   1   7 -12    9.80    4.60
   1  -7 -12   12.80    3.30
   1   7  12    7.10    6.20
  -1   7 -12   14.60    4.70
  -1   7 -12   12.90    4.60
   1   7  12    5.60    3.60
   1  -7 -12   11.30    3.80
  -3   7  12   61.09   10.90
   3  -7  12   56.89    6.70
  -3  -7 -12   60.59    6.10
   3   7 -12   49.90    7.50
  -3   7 -12   54.79    8.30
   3   7  12   56.89   10.80
   3  -7 -12   45.20    6.80
   3  -7 -12   56.59    6.00
   3   7  12   64.29    6.30
  -3  -7  12   51.99    6.90
   5   7 -12   36.60    6.30
   5  -7  12   43.80    8.40
  -5  -7 -12   33.70    5.70
  -5   7 -12   34.10    7.70
   5  -7 -12   34.20    7.40
   5   7  12   42.20    6.20
   5  -7 -12   37.70    6.20
   0   8  12 1406.66   59.99
   0  -8 -12 1520.15   53.69
   0   8 -12 1435.36   55.19
   0   8 -12 1371.96   54.39
   0  -8  12 1554.24   63.09
   2   8 -12  313.37   16.60
  -2  -8 -12  319.17   15.50
   2   8 -12  303.87   16.60
   2  -8  12  300.37   16.50
  -2   8  12  324.67   20.80
  -2  -8 -12  335.87   18.70
   2  -8 -12  296.77   16.10
   2   8  12  327.37   15.70
  -2  -8  12  327.87   16.30
   2  -8 -12  304.27   15.90
  -2   8 -12  273.97   16.50
   2   8  12  321.67   20.70
  -2   8 -12  298.87   17.30
   4   8 -12  688.43   30.20
   4  -8  12  733.83   31.10
  -4   8  12  712.83   34.40
   4   8 -12  746.73   31.10
  -4  -8 -12  752.02   29.20
  -4   8 -12  709.83   31.80
   4   8  12  714.03   29.20
   4  -8 -12  723.63   29.90
  -4  -8  12  750.22   28.90
   4   8  12  725.33   35.40
   4  -8 -12  691.53   30.00
  -1   9  12   14.90    8.30
   1   9 -12   17.50    5.50
   1  -9  12   28.50    5.80
   1   9 -12   22.90    6.80
  -1  -9 -12   17.70    4.80
  -1   9 -12   21.20    5.90
   1   9  12   25.70    9.00
   1  -9 -12   24.30    5.30
  -1   9 -12   24.00    6.10
  -3  -9 -12   16.30    4.40
   3  -9  12   15.50    4.90
  -3   9  12   13.40    8.30
   3   9 -12    6.30    4.70
   3   9 -12    8.90    4.70
   3  -9 -12   17.00    4.90
  -3   9 -12    4.90    5.10
   3  -9 -12    6.00    3.80
   3   9  12   15.00    5.00
   3   9  12   17.60    8.90
  -3  -9  12   20.90    5.00
   0 -10  12  112.39    9.40
   0 -10 -12  108.39    8.90
   0  10  12   94.19   15.30
   0  10 -12  129.29   10.40
   0  10 -12  115.99   10.90
   0   0 -13    3.40    2.80
   0   0 -13   -0.10    2.10
   0   0  13   -0.90    2.50
   0   0  13   -2.50    2.30
  -2   0 -13   11.00    6.00
   2   0  13    6.00    3.30
   2   0 -13   -1.10    5.30
   2   0 -13   11.20    3.10
   2   0 -13    2.00    3.30
   2   0  13    0.40    2.60
   4   0 -13   -1.40    5.30
  -4   0 -13   -1.80    5.50
   4   0 -13   -2.30    2.30
   4   0 -13    0.50    2.50
   4   0  13    0.60    2.60
   6   0  13   -1.40    2.90
   6   0 -13    3.60    3.50
   6   0 -13   -3.30    2.80
   1  -1  13   48.40    5.60
   1   1 -13   35.10    5.20
   1  -1  13   49.50    5.40
   1   1 -13   37.90    6.00
  -1  -1 -13   38.70    4.90
  -1  -1 -13   34.80    5.50
  -1   1 -13   43.20    5.70
   1   1  13   39.50    5.80
  -1  -1  13   44.70    5.80
   1   1  13   42.90    4.80
   1  -1 -13   43.60    5.70
   1   1  13   43.90    8.70
   3   1 -13  145.29   13.40
   3  -1  13  127.49    8.50
   3   1 -13  100.19    8.10
   3  -1  13  141.29    8.00
   3   1 -13  113.59    8.50
  -3  -1 -13  120.99   11.90
  -3   1  13  121.09    7.90
  -3   1 -13  140.49   14.90
   3   1  13  104.09   12.10
   3  -1 -13  126.29   12.90
  -3   1 -13  112.59    7.80
   3  -1 -13  118.69    8.30
   3   1  13  117.79    8.20
  -3  -1  13  126.99    7.90
   5   1 -13   17.60    4.70
   5  -1  13   21.50    4.60
   5  -1 -13   11.80    4.20
   5  -1 -13   11.70    4.40
   5   1  13   16.80    4.60
   0  -2  13   80.49    6.80
   0   2  13   84.29    6.90
   0   2  13   92.19   12.10
   0   2 -13   73.69    6.70
   0  -2 -13   94.59    6.40
   0  -2 -13   86.09    7.00
  -2  -2 -13 1110.59   47.50
   2  -2  13 1112.49   42.60
   2   2 -13 1206.28   43.40
   2   2 -13 1078.19   47.50
  -2   2  13 1133.49   45.60
  -2  -2 -13 1165.88   42.40
   2  -2  13 1163.68   41.80
  -2   2 -13 1154.58   42.00
   2   2  13 1145.09   42.40
  -2  -2  13 1124.29   42.20
   2  -2 -13 1156.38   41.90
   2  -2 -13 1108.29   48.40
   4   2 -13   47.70   10.20
   4  -2  13   70.49    6.20
   4  -2  13   71.99    6.50
   4   2 -13   61.49    6.70
  -4  -2 -13   66.69   10.30
   4   2  13   60.19    6.40
  -4   2 -13   56.29    6.40
   4   2  13   62.39   10.60
   4  -2 -13   60.39    6.60
   4  -2 -13   63.69    6.30
   6   2 -13  592.94   26.60
   6  -2  13  562.84   25.20
   6   2  13  621.64   25.00
   6  -2 -13  628.44   25.10
   6  -2 -13  604.64   26.60
   1   3 -13    2.90    5.80
   1  -3  13    2.50    3.00
  -1   3  13   -0.70    4.10
   1   3 -13   -2.90    2.30
  -1   3  13   -2.10    2.40
  -1  -3 -13   -2.40    2.20
   1   3  13    0.70    2.80
   1  -3 -13    0.30    2.60
  -1  -3  13   -0.70    3.00
  -1   3 -13    1.10    2.80
  -1   3 -13   -1.60    5.20
   1  -3 -13    0.50    2.10
   3   3 -13   14.30    7.30
  -3  -3 -13   13.50    6.90
  -3  -3 -13   30.00    5.30
  -3   3  13   28.70    6.40
   3   3 -13   23.70    5.10
   3  -3  13   22.60    6.30
   3  -3  13   31.90    5.00
   3   3  13   30.80    5.30
  -3   3 -13   22.90    6.00
  -3   3 -13   22.90    4.80
   3   3  13   19.40    7.00
  -3   3 -13   16.40    9.30
   3  -3 -13   27.10    5.00
   5   3 -13    0.60    3.00
   5  -3  13    2.20    3.40
   5  -3 -13   -2.10    2.60
   5   3  13   -1.50    3.20
   5   3  13    2.10    4.40
   5  -3 -13   -2.60    2.60
   0   4  13    0.80    3.00
   0   4 -13    0.70    3.00
   0   4  13    0.80    4.90
   0  -4  13    2.90    3.10
   0  -4 -13    3.70    6.20
   0  -4  13    3.20    3.10
   0  -4 -13    2.30    2.60
   2  -4  13    2.70    3.20
   2   4 -13    1.00    5.50
   2   4 -13    0.10    2.60
  -2   4  13    6.20    6.40
  -2  -4 -13    5.10    3.30
   2  -4  13    3.10    3.30
   2   4  13    4.40    5.50
  -2   4 -13    1.80    2.60
  -2   4 -13    1.30    5.80
   2  -4 -13    0.00    2.50
  -2   4 -13    0.10    3.20
   2   4  13    1.00    3.10
   2  -4 -13    0.80    2.40
  -4   4  13   23.50    6.40
   4   4 -13   25.90    5.30
  -4  -4 -13   28.20    5.30
   4  -4  13   31.90    5.50
   4  -4  13   28.30    5.50
  -4   4 -13   32.70    6.30
   4   4  13   20.20    4.90
   4  -4 -13   25.40    4.70
   4  -4 -13   22.20    4.60
   4   4  13   18.10    7.50
   1   5 -13    1.50    2.90
  -1  -5 -13   -2.80    2.20
  -1   5  13   -4.50    4.30
   1  -5  13    3.00    2.90
   1  -5  13    2.80    3.20
  -1  -5 -13   -0.30    5.70
  -1   5  13   -0.10    2.50
   1   5  13   -2.10    5.00
   1  -5 -13    0.70    2.90
   1   5  13    2.50    3.40
   1  -5 -13    1.80    2.80
  -1   5 -13    5.70    3.70
   3   5 -13    5.70    3.60
  -3  -5 -13   13.00    7.00
   3  -5  13    8.10    4.10
  -3  -5 -13   11.70    3.90
  -3   5  13    8.50    6.10
   3   5  13   12.20    4.40
   3   5  13    8.10    6.30
  -3   5 -13   19.60    5.10
   3  -5 -13    8.20    3.70
  -3   5 -13   16.70    4.70
   3  -5 -13    7.20    3.60
   5   5 -13   -3.90    3.10
   5  -5 -13    7.80    4.20
   5   5  13    6.20    6.20
   5  -5 -13    0.10    3.00
  -5   5 -13   -3.50    3.50
   5   5  13    0.50    3.60
   0   6  13   55.09    6.20
   0  -6 -13   62.69    6.60
   0   6  13   73.69   11.90
   0   6 -13   71.19    7.60
  -2  -6 -13  640.74   29.10
   2   6 -13  587.74   25.50
  -2  -6 -13  597.74   24.70
  -2   6  13  569.34   29.40
  -2   6 -13  547.65   25.60
  -2   6 -13  572.34   26.00
   2   6  13  624.54   26.60
   2  -6 -13  585.94   25.00
   2   6  13  559.04   29.50
   2  -6 -13  591.84   23.80
  -4   6  13   59.69    9.90
  -4  -6 -13   79.99    6.90
   4  -6  13   55.79    8.40
   4  -6 -13   67.59    7.10
   4   6  13   65.39   11.10
   4   6  13   82.59    7.20
  -4   6 -13   88.39    8.40
   4  -6 -13   68.69    6.90
  -1   7  13    7.50    6.30
   1   7 -13   13.30    5.00
   1   7 -13    7.70    4.00
  -1  -7 -13   13.50    4.50
   1   7  13    5.10    4.40
   1   7  13    4.90    6.30
  -1   7 -13    9.30    4.40
  -1   7 -13    5.30    4.50
   1  -7 -13    9.60    3.80
  -3  -7 -13   40.90    6.10
   3   7 -13   28.20    6.00
   3  -7  13   37.20    6.70
  -3   7  13   40.30    9.50
   3  -7 -13   31.20    5.30
   3  -7 -13   33.10    5.70
   3   7  13   41.20   10.30
  -3  -7  13   38.40    6.60
   3   7  13   43.80    6.50
  -3   7 -13   39.70    7.20
   0   8 -13    6.40    4.40
   0   8 -13   -1.10    2.90
   0   8  13   -2.40    5.60
   0  -8 -13    2.30    3.40
   0  -8  13    4.30    3.80
   2   8 -13    2.20    3.70
   2   8 -13   -2.40    3.40
   2  -8  13    1.80    3.50
  -2   8  13   -1.00    6.20
  -2  -8 -13   -1.50    3.00
   2  -8 -13    4.70    3.10
   2  -8 -13   -0.60    3.10
  -2   8 -13    7.90    4.50
   2   8  13   -5.50    5.60
  -2   8 -13    3.20    4.00
  -2  -8  13    1.20    3.10
   1   9 -13   51.59    8.00
   1  -9  13   52.39    7.90
   1   9 -13   49.90    8.30
  -1   9  13   31.50   10.50
  -1   9 -13   61.89    9.20
   1   9  13   53.69   11.20
   1  -9 -13   48.70    7.20
  -1  -9  13   66.99    7.50
  -1   9 -13   34.50    7.70
   0   0 -14  825.62   31.40
   0   0 -14  833.82   33.30
   0   0  14  805.52   32.20
   0   0 -14  789.52   38.40
   0   0  14  859.31   31.50
   2   0 -14   46.10    6.40
  -2   0 -14   48.70    6.10
  -2   0 -14   54.09   11.00
   4   0  14  264.67   13.70
   4   0 -14  237.58   13.10
   4   0 -14  245.38   13.70
  -1  -1 -14  321.57   20.30
  -1  -1 -14  301.37   15.20
  -1   1  14  322.17   14.90
   1  -1  14  314.47   14.20
  -1  -1 -14  299.27   13.80
   1   1 -14  262.07   14.00
   1  -1  14  299.67   14.90
  -1  -1  14  303.07   15.00
  -1   1 -14  320.07   20.60
   1   1  14  296.17   13.60
  -1   1 -14  290.87   14.30
  -1  -1  14  304.17   14.70
   1   1  14  321.27   16.30
   1  -1 -14  287.37   14.80
   1   1  14  294.07   18.30
   1  -1 -14  292.57   14.20
   3   1 -14   42.00    6.30
   3   1 -14   34.00    5.70
   3  -1  14   49.90    5.80
   3  -1 -14   41.10    6.20
   3   1  14   32.80    8.00
   3  -1 -14   38.20    5.90
   3   1  14   41.00    6.20
  -3   1 -14   42.20    6.00
  -3   1 -14   40.20    9.80
   5   1 -14  221.38   13.70
   5  -1 -14  248.18   13.00
   5   1  14  254.27   13.30
   5  -1 -14  222.88   13.50
   0   2  14   -0.20    5.00
   0  -2 -14   -2.80    5.40
   0  -2  14   -1.50    3.10
   0   2 -14   -0.40    4.80
   0   2 -14   -0.40    2.50
   0  -2  14    0.90    2.70
   0  -2 -14   -3.20    2.10
   0  -2 -14    3.30    3.70
   0   2  14    2.30    3.30
   2   2 -14  232.48   13.10
  -2  -2 -14  237.98   13.20
   2  -2  14  252.97   13.40
  -2  -2 -14  275.17   18.90
   2  -2  14  264.07   12.70
  -2   2 -14  235.88   12.70
   2   2  14  243.18   16.80
  -2  -2  14  261.07   17.80
  -2   2 -14  240.18   18.10
   2  -2 -14  246.08   13.10
   2  -2 -14  238.78   13.00
  -4  -2 -14   -1.90    6.00
   4  -2  14    0.60    3.10
   4  -2  14   -0.20    3.20
   4   2 -14   -1.30    3.10
  -4   2 -14   -0.40    3.00
   4  -2 -14   -2.00    2.80
   4   2  14    2.00    5.30
  -4   2 -14   12.70    7.00
   4   2  14    2.80    3.50
   4  -2 -14    0.80    3.00
  -1   3  14   34.90    8.10
   1  -3  14   21.70    5.00
   1  -3  14   33.40    5.50
   1   3 -14   26.40    5.10
  -1  -3 -14   34.20    5.70
  -1  -3 -14   21.10    8.60
   1  -3 -14   24.90    4.60
   1  -3 -14   30.80    5.70
   1   3  14   39.10    9.00
   1   3  14   43.50    6.30
  -1   3 -14   43.70    6.80
  -1  -3  14   32.90    5.50
   3   3 -14   39.80    6.70
   3  -3  14   42.90    6.80
  -3  -3 -14   48.70    7.10
  -3   3  14   38.30    8.50
   3  -3  14   53.89    6.60
   3   3  14   56.39   10.30
   3  -3 -14   40.40    6.00
   3  -3 -14   52.99    5.90
  -3   3 -14   38.90    6.20
  -3   3 -14   37.90    6.90
   3   3  14   41.80    6.90
   5  -3  14   41.70    7.30
   5   3 -14   44.30    7.20
   5  -3  14   60.09    7.70
   5  -3 -14   39.30    6.50
   5  -3 -14   59.89    6.50
   5   3  14   58.39   10.70
  -5   3 -14   48.90    7.20
  -5   3 -14   48.90   11.10
   5   3  14   64.99    8.30
   0  -4  14 1880.41   70.09
   0  -4 -14 1684.03   62.69
   0   4 -14 1739.13   63.09
   0   4  14 1852.71   63.59
   0   4  14 1585.04   67.19
   2   4 -14  636.64   28.90
   2  -4  14  715.03   29.00
  -2  -4 -14  782.42   34.60
  -2   4  14  698.93   32.90
  -2  -4 -14  758.42   29.40
   2  -4 -14  715.73   29.10
   2   4  14  711.13   34.00
   2   4  14  808.32   29.90
  -2   4 -14  681.63   29.20
   2  -4 -14  688.83   30.90
  -2   4 -14  709.33   29.90
  -4  -4 -14  790.42   30.70
   4   4 -14  705.23   31.20
  -4   4  14  734.73   32.80
   4  -4 -14  764.02   30.70
   4   4  14  742.93   30.60
   4  -4 -14  759.52   30.80
   4   4  14  759.32   35.40
  -4   4 -14  788.02   31.70
   1   5 -14   13.80    4.20
  -1   5  14   13.40    6.90
  -1  -5 -14    8.20    6.70
   1   5  14   11.70    3.50
   1   5  14    7.70    5.70
  -1   5 -14    7.20    4.10
   1  -5 -14   12.30    3.50
   1  -5 -14    7.50    3.90
  -3   5  14   10.10    6.60
  -3  -5 -14    9.10    4.40
  -3  -5 -14   12.60    7.70
   3   5 -14   14.50    4.60
  -3   5 -14   17.60    5.30
   3  -5 -14    9.10    4.30
   3   5  14   11.50    4.80
   3   5  14    4.80    6.50
   3  -5 -14    8.60    4.10
  -3   5 -14    4.60    3.90
   0  -6 -14   71.19    6.90
   0   6 -14   62.09    8.50
   0   6  14   69.39   12.00
   2   6 -14  338.77   18.20
  -2   6  14  377.86   22.20
   2  -6 -14  370.26   17.90
   2   6  14  395.46   19.10
  -2   6 -14  363.06   19.00
   2   6  14  381.86   22.80
  -2   6 -14  318.77   18.20
   2  -6 -14  391.26   17.00
  -4  -6 -14   30.80    5.90
   4   6 -14   25.60    5.70
  -4   6  14   19.50    7.70
   4   6  14   32.70    6.30
   4  -6 -14   40.00    6.30
   4  -6 -14   27.10    5.60
   4   6  14   30.30    9.20
  -4   6 -14   33.40    7.10
  -1  -7 -14  246.98   13.40
  -1   7  14  217.18   17.30
   1   7 -14  222.68   14.10
   1   7 -14  209.28   13.80
  -1   7 -14  215.48   14.10
  -1   7 -14  217.78   13.80
   1   7  14  262.47   18.50
   1  -7 -14  239.58   13.20
   3   7 -14   22.60    5.80
  -3  -7 -14    9.90    9.30
   3  -7  14   26.40    6.20
  -3   7  14   24.60    9.20
   3  -7 -14   23.20    4.80
  -3   7 -14   26.00    6.80
   3   7  14   26.00    8.40
  -3  -7  14   30.70    5.70
   3  -7 -14   25.90    5.60
   0  -8  14  382.26   19.20
   0  -8 -14  370.26   18.30
   0   8  14  414.66   24.30
   0   8 -14  323.17   18.50
   0   8 -14  361.36   19.70
  -2  -8 -14   18.50    4.80
   2   8 -14    7.60    5.00
   2  -8  14   23.50    5.40
   2   8 -14   22.70    6.30
  -2   8  14    5.10    7.30
   2  -8 -14   18.90    4.60
  -2   8 -14   13.80    5.70
   2  -8 -14   18.90    5.30
  -2   8 -14   17.40    6.50
   2   8  14    7.80    7.70
   0   0 -15    3.50    3.00
   0   0 -15   -1.50    3.00
  -2   0 -15    0.90    2.80
   2   0  15   -0.90    2.90
   2   0  15   -0.30    2.80
   2   0 -15    2.10    3.10
   2   0 -15    0.70    3.40
   4   0  15    2.50    3.50
  -4   0 -15   -0.50    7.00
   4   0 -15    2.10    3.50
   4   0 -15   -1.60    3.10
  -1  -1 -15  116.09    9.30
  -1  -1 -15  115.89    7.80
   1   1 -15  118.79    8.50
   1  -1 -15  109.59    9.10
  -1  -1  15  131.49    8.80
   1   1  15  129.79   12.40
   1   1  15  121.49   10.60
   1  -1 -15  116.09    8.90
  -1   1 -15  144.79    9.00
   3  -1  15   68.29    7.50
   3   1 -15   67.89    7.30
  -3  -1 -15   65.49   14.00
   3  -1 -15   68.09    7.10
   3  -1 -15   80.19    7.30
   3   1  15   93.49   13.40
   0   2  15  113.79   11.70
   0  -2 -15  116.89    7.80
   0  -2 -15  104.79    8.70
   0   2 -15  130.99    9.10
   2  -2  15  289.77   14.00
   2   2 -15  257.57   14.00
  -2   2  15  252.07   16.80
  -2   2 -15  251.07   13.80
   2   2  15  281.07   14.40
   2  -2 -15  263.47   14.20
   2  -2 -15  276.57   13.80
   2   2  15  260.37   17.80
  -4  -2 -15  207.28   17.50
   4   2 -15  188.48   12.60
  -4   2 -15  224.58   12.60
   4  -2 -15  187.98   11.90
   4   2  15  207.08   12.50
   4   2  15  224.88   16.10
   4  -2 -15  203.28   12.30
  -1  -3 -15   78.19    7.50
   1  -3  15   60.59    8.60
  -1   3  15   86.39   12.00
   1   3 -15   72.89    7.30
  -1   3 -15   63.99    7.30
   1  -3 -15   75.19    7.20
   1  -3 -15   80.59    6.60
   1   3  15   81.29   12.70
   3  -3  15   13.10    4.40
  -3   3  15    7.40    5.90
  -3  -3 -15   11.80    9.40
   3   3 -15   17.10    5.00
  -3  -3 -15   18.70    5.50
   3  -3 -15   15.10    4.50
  -3   3 -15   14.20    4.80
   3  -3 -15   21.20    5.10
   3   3  15   22.40    8.70
   3   3  15   10.50    4.90
  -3   3 -15   10.60    4.90
   0   4 -15    5.70    4.20
   0   4  15    1.10    5.50
   0  -4 -15   15.10    5.00
  -2  -4 -15   24.90    5.70
   2   4 -15   11.10    4.50
  -2   4  15   21.20    7.80
  -2   4 -15   15.50    4.80
   2   4  15   26.60    8.00
   2  -4 -15   16.60    4.70
   2  -4 -15   20.50    4.50
  -2   4 -15   18.90    5.50
   4   4 -15    0.30    3.40
  -4   4  15    1.70    5.30
  -4  -4 -15    2.30    7.60
   4  -4 -15    8.10    4.30
   4   4  15    5.40    4.40
   4  -4 -15    5.00    3.80
  -4   4 -15    1.20    3.90
   4   4  15    0.80    6.00
  -1  -5 -15   33.30    6.10
   1   5 -15   39.80    6.60
  -1   5  15   34.40    9.20
   1  -5 -15   41.10    6.50
   1   5  15   46.60   10.30
   1  -5 -15   45.30    5.90
  -1   5 -15   32.50    6.20
  -3  -5 -15   50.29   11.20
  -3   5  15   57.99   10.40
   3   5 -15   40.30    6.80
   3   5  15   49.50   11.00
  -3   5 -15   71.19    8.00
  -3   5 -15   43.40    7.40
   3  -5 -15   47.20    7.40
   3  -5 -15   49.00    6.70
   0   6  15  197.38   16.00
   0   6 -15  204.38   12.90
   0  -6 -15  192.18   12.10
   2   6 -15  119.49   10.40
  -2  -6 -15  139.49    9.90
  -2   6  15  152.78   13.90
  -2   6 -15  121.39   10.60
  -2   6 -15  134.49   10.80
   2  -6 -15  151.28    9.30
   2  -6 -15  130.49    9.90
   2   6  15  147.69   14.00
   1   7 -15  101.69    9.30
   1   7 -15   94.39    9.20
  -1  -7 -15   83.29    8.20
  -1   7  15   89.79   13.60
  -1   7 -15   98.69    9.20
   1  -7 -15   89.19    8.10
   1   7  15   93.79   13.70
  -1   7 -15   79.59    8.60
   0   0 -16   96.79    7.70
  -2   0 -16  450.45   19.50
   2   0 -16  449.95   20.50
   2   0 -16  424.06   20.60
   2   0  16  460.05   20.20
   4   0 -16  381.16   18.50
  -4   0 -16  380.46   18.30
   4   0 -16  362.86   18.90
  -1  -1 -16   43.30    6.00
   1  -1  16   57.39    7.20
   1   1 -16   55.69    6.30
  -1  -1 -16   60.39    8.50
   1  -1 -16   52.29    6.70
   1  -1 -16   59.09    8.00
  -1   1 -16   58.89    6.60
   3   1 -16    8.50    4.40
   3  -1  16   15.70    5.10
   3  -1 -16    8.40    4.30
   3  -1 -16    8.10    4.20
   0   2  16  274.47   18.40
   0   2 -16  270.67   14.60
   0  -2 -16  287.97   15.10
   0  -2 -16  272.97   13.40
   2  -2  16    5.10    5.20
   2   2 -16   14.00    4.30
  -2  -2 -16    6.60    4.70
   2  -2 -16   13.20    4.20
  -2   2 -16    9.20    4.10
   2   2  16   13.90    7.60
   2  -2 -16   18.40    5.20
  -1   3  16   90.79   12.70
  -1  -3 -16   99.69    8.40
   1   3 -16   76.99    7.90
  -1   3 -16   76.89    8.30
   1  -3 -16   89.49    7.50
   1  -3 -16   97.89    8.60
   1   3  16  118.89   11.70
   3   3 -16   41.20    6.40
   3   3  16   35.30    9.80
   3  -3 -16   38.30    6.50
   3  -3 -16   43.90    6.50
  -3   3 -16   40.80    6.70
  -3   3 -16   48.30    8.10
   0  -4 -16   49.99    7.30
   0   4  16   55.59   10.60
  -2  -4 -16   27.60    6.10
  -2   4  16   30.60    8.40
   2   4 -16   32.10    5.70
  -2   4 -16   23.20    6.70
   2  -4 -16   32.70    5.50
  -2   4 -16   34.40    6.50
   2   4  16   43.20    9.80
   2  -4 -16   22.60    5.50
   1   5 -16   75.39    8.10
  -1  -5 -16   97.29    8.30
  -1   5  16   89.99   13.80
   1  -5 -16   89.99    7.10
   1  -5 -16   90.19    8.20
   1   5  16   75.29   12.50
  -1   5 -16   66.69    9.20
   0  -6 -16   33.30    6.00
   0   6  16   28.10    9.40
   0   6 -16   35.20    7.60
   0   0 -17    2.70    3.40
   2   0 -17    1.30    4.10
  -2   0 -17    8.70    4.10
   2   0  17   10.70    4.30
   2   0 -17   -1.90    3.40
  -1  -1 -17   43.30    6.90
   1   1 -17   43.70    6.90
   1  -1 -17   41.80    6.20
   1  -1 -17   38.10    7.40
  -1   1 -17   41.60    6.40
   0  -2 -17  638.94   26.20
   0  -2 -17  662.53   28.30
   0   2  17  677.13   32.60
   0   2 -17  625.64   27.30
   2   2 -17   79.59    8.20
  -2   2 -17   95.89    7.90
   2   2  17  113.59   12.60
   2  -2 -17   83.39    8.00
   2  -2 -17   98.59    8.60
  -1   3  17   10.80    7.50
  -1  -3 -17   45.90    7.00
   1   3 -17   24.80    5.90
   1   3  17   21.10    8.60
  -1   3 -17   26.80    6.10
   1  -3 -17   37.60    6.60
   1  -3 -17   24.50    5.10
   0   4  17   17.50    8.90
   0  -4 -17   21.70    5.80
   0   4 -17   18.00    5.40
   0   0   0    0.00    0.00

_computing_structure_solution     'SHELXT 2018/2 (Sheldrick, 2018)'
;
_shelx_hkl_checksum   50636
